# Supplementary material for: Enrichment of histone tail methylated lysine residues via cavitand-decorated magnetic nanoparticles for ultra-sensitive proteomics
Source: Royal Society of Chemistry journal article supplement (doi:10.1039/d4sc02076f), 2024-01-01
Supplement: d4sc02076f1.xlsx [file d4sc02076f1.xlsx]

## Sheet: Supplementary Table
Accession	Description	Gene symbol	Peptide Modified Sequence	Me_NP1_C3_ELU	Me_NP1_C3_SUP	Me_NP2_C3_ELU	Me_NP2_C3_SUP	Me_NP3_C3_ELU	Me_NP3_C3_SUP	Me_NP4_C3_ELU	Me_NP4_C3_SUP	Me_NP5_C3_ELU	Me_NP5_C3_SUP	NP4_C3_ELU	NP5_C3_ELU	PO_NP1_C3_ELU	PO_NP1_C3_SUP	PO_NP2_C3_ELU	PO_NP2_C3_SUP	PO_NP3_C3_ELU	PO_NP3_C3_SUP	PO_NP4_C3_ELU	PO_NP4_C3_SUP	PO_NP5_C3_ELU	PO_NP5_C3_SUP	Me_NP1_C1_ELU	Me_NP1_C1_SUP	Me_NP1_C2_ELU	Me_NP1_C2_SUP	Me_NP2_C1_ELU	Me_NP2_C1_SUP	Me_NP2_C2_ELU	Me_NP2_C2_SUP	Me_NP3_C1_ELU	Me_NP3_C1_SUP	Me_NP3_C2_ELU	Me_NP3_C2_SUP	Me_NP4_C1_ELU	Me_NP4_C1_SUP	Me_NP4_C2_ELU	Me_NP4_C2_SUP	Me_NP5_C1_ELU	Me_NP5_C1_SUP	Me_NP5_C2_ELU	Me_NP5_C2_SUP	NP1_C1_ELU	NP1_C1_SUP	NP1_C2_ELU	NP1_C2_SUP
Q9BQC6	Large ribosomal subunit protein mL63 (Mitochondrial ribosomal protein 63) (Mitochondrial ribosomal protein L57) (Ribosomal protein 63, mitochondrial) (hMRP63)	RT63	FPPHR[+14]FIADQLDHLNVTK[+28]	0	829909	0	613442	1073521	587951	0	0	0	0	72105	0	0	0	0	6245346	0	7963797	0	0	0	3819069	0	75610	0	43355	0	241282	287520	0	0	410180	0	41663	0	369201	0	122920	0	235326	0	33691	0	0	0	2488437
Q9BYW2	Histone-lysine N-methyltransferase SETD2 (EC 2.1.1.359) (HIF-1) (Huntingtin yeast partner B) (Huntingtin-interacting protein 1) (HIP-1) (Huntingtin-interacting protein B) (Lysine N-methyltransferase 3A) (Protein-lysine N-methyltransferase SETD2) (EC 2.1.1.-) (SET domain-containing protein 2) (hSET2) (p231HBP)	SETD2	FK[+28]NSFCCTELNEEIK[+28]	0	0	0	0	0	0	237591	0	129183	1271518	14411029	16337909	1744853	1243298	0	339073	0	471331	3145796	3725609	583283	682018	781846	680704	613488	41942	621521	1334757	0	112701	0	706799	0	66077	1163829	930362	0	142836	0	256104	0	51819	1269380	0	165732	166471
O75475	PC4 and SFRS1-interacting protein (CLL-associated antigen KW-7) (Dense fine speckles 70 kDa protein) (DFS 70) (Lens epithelium-derived growth factor) (Transcriptional coactivator p75/p52)	PSIP1	KDEEGQK[+14]EEDKPR	6411	0	0	5052103	120927	5587129	122749	5946626	0	10344	972629	0	145309	0	6672	748059	449111	0	139448	1486566	0	449727	206295	30971	8319	427690	217631	1993515	159833	1011450	207064	2101026	62233	1484666	93810	4349214	50510	1388499	271957	0	5400	1633801	584130	4547520	186868	208506
O75475	PC4 and SFRS1-interacting protein (CLL-associated antigen KW-7) (Dense fine speckles 70 kDa protein) (DFS 70) (Lens epithelium-derived growth factor) (Transcriptional coactivator p75/p52)	PSIP1	KDEEGQK[+14]EEDKPR	0	0	0	0	361404	0	430331	0	0	0	2798599	0	436103	0	0	2446995	1104090	0	408728	4304109	0	1450059	588275	157522	149970	0	678848	0	599096	0	519549	0	124871	0	390635	0	254588	0	751611	259325	94398	0	1808506	0	613684	0
O75475	PC4 and SFRS1-interacting protein (CLL-associated antigen KW-7) (Dense fine speckles 70 kDa protein) (DFS 70) (Lens epithelium-derived growth factor) (Transcriptional coactivator p75/p52)	PSIP1	KDEEGQKEEDK[+14]PR	6395	0	0	0	120427	0	0	13137	0	190593	973031	694614	144058	13989	447701	747977	450141	622646	138655	1485932	104475	0	206317	30988	8317	463793	217618	1992580	159680	1011375	207075	2100450	62252	1249257	93791	4347781	50509	1307768	271905	0	5400	1474478	572696	4559897	199711	208498
O75475	PC4 and SFRS1-interacting protein (CLL-associated antigen KW-7) (Dense fine speckles 70 kDa protein) (DFS 70) (Lens epithelium-derived growth factor) (Transcriptional coactivator p75/p52)	PSIP1	KDEEGQKEEDK[+14]PR	0	0	0	0	361967	0	0	0	0	646319	2799546	2121960	438237	0	904606	2458352	1106128	2182361	409129	4311040	353115	0	583108	157536	149974	0	678841	0	599149	0	519573	0	124872	0	390574	0	254692	0	751592	259331	94399	0	1751060	0	529317	0
O75475	PC4 and SFRS1-interacting protein (CLL-associated antigen KW-7) (Dense fine speckles 70 kDa protein) (DFS 70) (Lens epithelium-derived growth factor) (Transcriptional coactivator p75/p52)	PSIP1	KDEEGQKEEDKPR[+14]	430421	0	303466	0	361044	0	429924	0	352539	142080	2809131	2124191	0	3536986	1157991	2471172	1105175	2242687	404940	4307442	358548	1451793	643883	157617	150407	0	678724	141701	598459	0	519370	0	124866	0	392207	0	254645	0	606919	259278	94399	0	1757133	0	578939	0
O75475	PC4 and SFRS1-interacting protein (CLL-associated antigen KW-7) (Dense fine speckles 70 kDa protein) (DFS 70) (Lens epithelium-derived growth factor) (Transcriptional coactivator p75/p52)	PSIP1	TGVTSTSDSEEEGDDQEGEKK[+28]	713400	145471	0	318946	0	248409	0	488708	25229	108038	675266	280237	913643	0	0	0	0	102943	0	0	0	57753
O60292	Signal-induced proliferation-associated 1-like protein 3 (SIPA1-like protein 3) (SPA-1-like protein 3)	SI1L3	TSVTVK[+14]VVIIPPFEDGTPR[+14]R	0	207929	0	0	0	349193	0	0	0	0	0	0	0	0	0	0	0	802403	0	234200	0	0	0	0	0	0	0	0	0	0	0	0	0	0	0	0	0	0	0	0	0	0	0	1926942	0	0
Q6IQ49	Splicing regulator SDE2 (Replication stress response regulator SDE2)	SDE2	AESK[+14]EPIEEEPTGAGLNK[+14]	3958807	9751947	20273888	0	22734038	7833176	9782713	5529757	14060981	0	8218075	2665017	0	0	2605119	0	0	0	1054379	41922268	581486	0	0	0	0	101912	476880	0	0	77021	284813	0	0	0	2244230	0	0	26155	4473296	0	0	0	950350	0	1124029	0
Q6IQ49	Splicing regulator SDE2 (Replication stress response regulator SDE2)	SDE2	AESK[+14]EPIEEEPTGAGLNK[+14]	356633	1249693	5172555	0	724367	1289744	908075	768678	2037225	0	9941048	3681817	0	0	4533923	0	0	0	1703595	29903848	1444610	0	0	0	0	0	0	0	72641	0	0	202630	0	0	0	121537	0	0	450520	0	1720304	0	941309	0	0	0
Q9NPE3	H/ACA ribonucleoprotein complex subunit 3 (Nucleolar protein 10) (Nucleolar protein family A member 3) (snoRNP protein NOP10)	NOP10	MFLQYYLNEQGDR[+14]	4672539	436330	4140884	0	0	0	407189	0	1840701	295780	4559157	11715743	691079	0	1784847	0	5111130	3925495	4380913	35685300	0	0	540911	0	0	0	0	0	0	0	550614	0	342596		396233	587808	0	0	269644	0	0	83678	9193619	399111	4551480	609735
Q32P51	Heterogeneous nuclear ribonucleoprotein A1-like 2 (hnRNP A1-like 2) (hnRNP core protein A1-like 2)	RA1L2	GFAFVTFDDHDSVDK[+14]	0	0	7065435	0	0	0	0	0	0	0	5152353	0	0	0	21525976	270576	3040330	0	5055427	180691	900730	0	0	267618	0	0	0	0	0	0	0	37339	0	0	448811	478497	276427	0	620066	113823	0	0	2308329	0	753432	0
Q32P51	Heterogeneous nuclear ribonucleoprotein A1-like 2 (hnRNP A1-like 2) (hnRNP core protein A1-like 2)	RA1L2	GFAFVTFDDHDSVDK[+14]	0	0	934188	0	16699	0	13477	0	0	113783	0	0	0	0	0	0	475074	0	0	0	60847	64728	0	0	0	38079	0	38347	126210	0	0	37856	205835	41744	0	0	0	0	166169	0	170769	0	1839323	129846	889485	431389
Q5TEC6	Histone H3-7	H3PS2	K[+28]SAPATGGVK	10133	71874	510482	82314	69237	44970	99174	175179	300603	6093173	6412356096	68989	80760	716625	473351	145450	55090	166231	14619254	15757261	12076858	61259	2621134336	2533972480	1513927296	3391065088	2941268480	3039100160	1497966208	3283012608	1205428864	3114025728	1954453376	3195758848	1528529664	3508311808	1105079040	3528718848	2025090432	2862226688	878772288	1729545344	1200224640	30517514240	3248472832	11929141248
Q5TEC6	Histone H3-7	H3PS2	K[+42]SAPATGGVK	1647922	417324	11267538	35259192	8023924	35045140	10869724	43743352	13236760	42248780	926697600	73873	12049047	3820984320	4309412	2511250	13394494	10887096	1277187968	2131316	189715	2134777088	148392864	733681472	515716800	2154445056	1279306496	897748672	536384192	2228788736	92831040	978882432	924724032	1690999680	112889720	1032033920	252304960	2222041344	116442712	855703488	364367776	871576384	509357664	14520635392	1299011712	6254875648
Q5TEC6	Histone H3-7	H3PS2	K[+14]SAPATGGVK	5384625	1393738	507527872	918009	5841230	2335605	19210184	13504294	5271951	4469918	943794688	0	288924	15442711	4008733	16712804	33655	3969740	2415841	6319852	15291	7136399	381198336	685313984	297954880	849076288	413771904	805475008	280944384	883964672	194277296	856137856	388643104	796491840	210538288	980474368	227350144	879215296	258538816	756169280	199456624	463086976	211770144	8385864192	469746304	2889005056
Q5TEC6	Histone H3-7	H3PS2	KSAPATGGVK[+28]	43034	74641	5139580	140080	4368699	90434	260517	21404	3699551488	114974	50510	4872136704	0	0	0	0	12455228416	0	0	349530	92468	269132	2621134336	2533972480	1513927296	3391065088	2941268480	3039100160	1497966208	3283012608	1205428864	3114025728	1285548288	3195758848	810576192	3508311808	1105079040	3528718848	2025090432	2862226688	878772288	1729545344	1200224640	26929014784	3248472832	11929141248
Q5TEC6	Histone H3-7	H3PS2	KSAPATGGVK[+28]	35340	889101	57464	1889258	61069	1627340	650953	303488	8945900	1706996	370205	13789041	780942	1558097	145269	638755	15066493	552238	168083	273627	631953	2489136	3420683	20335830	15990575	22809418	4376355	23304210	18707570	23183642	2227867	22753306	5912027	20627484	1158610	28674602	12805577	24546622	5419634	21498920	7493592	13547542	5495554	11941135	18151252	28953196
Q5TEC6	Histone H3-7	H3PS2	KSAPATGGVK[+14]	5388532	142183	8053530	144425	74984	123673	2198210	44069	2115684	194293584	85911	380875	747397376	5487614	716659392	74421	387779	14111675	5915290	6319852	369040	445096	381198336	685313984	241518880	849076288	413771904	767068672	280944384	883964672	194277296	568901440	388643104	796491840	210538288	980474368	227350144	879215296	258538816	153600208	199456624	463086976	169791408	6679679488	469746304	2165072896
Q5TEC6	Histone H3-7	H3PS2	KSAPATGGVK[+14]	0	26308	0	633892	0	0	1536716	786541	0	40105	0	72262	1918274	0	1779671	0	325332	36559	5098328	0	131112	132416	972790	4454559	540888	4354525	470133	2907570	2481047	4730209	402314	2750025	1862978	4543572	561501	6134348	2266738	4959629	351826	2602368	895842	2428489	909746	33450270	3013330	8264573
Q5TEC6	Histone H3-7	H3PS2	K[+28]SAPATGGVK[+28]	181672080	581701	20297586	1126779	42534640	122376	1521955	641343	76603872	1492310	158677648	335009	643245440	3257330	5797521	3843682	675846336	933435	491769	517575840	417857952	356951	78828752	117866096	67185664	432578688	107987056	152337344	73798896	320580864	36611568	163557520	184474368	234277808	40875188	164486384	56746256	231811232	90744856	135107664	71811288	229994640	70930000	3055262208	335519552	1301403648
Q5TEC6	Histone H3-7	H3PS2	K[+28]SAPATGGVK[+14]	4995649	129277	30699	112557	295288	141939	1269159296	605558	1287640704	4144854528	932628672	786517376	64438	157306	57623	2937067008	345573	27132	8963371	4006365952	31446	75639	148392864	733681472	515716800	2154445056	1279306496	897748672	536384192	2228788736	92831040	978882432	924724032	1690999680	112889720	1032033920	252304960	2222041344	116442712	855703488	364367776	871576384	509357664	14520635392	1299011712	6254875648
Q5TEC6	Histone H3-7	H3PS2	K[+42]SAPATGGVK[+28]	13482589	62436284	15563749	0	15785204	0	16909784	55005752	19609232	88578816	0	0	38726748	0	50692996	123907016	68578112	124723224	27242420	127051072	24795002	0	16268631	9995145	5251699	46366792	25114110	15769305	6069790	29291480	2223362	14827455	9804483	43815636	815158	16730361	4260584	48387040	7338012	575221	367035	18652450	6882616	266289040	16904322	119767840
Q5TEC6	Histone H3-7	H3PS2	K[+42]SAPATGGVK[+14]	181851120	390289632	222770544	453606176	42191344	317396608	0	100097	140797984	467697280	12429584	241192960	0	572773760	772056960	352918176	685064192	444393696	232693408	0	0	0	77502520	118338712	68293408	446110624	105390872	149530432	74491296	322325536	35393872	166499760	183344416	230973552	41906504	164778160	56838752	232417760	89672392	135150400	71960384	228403248	72073128	2997378048	338010048	1309046912
Q5TEC6	Histone H3-7	H3PS2	K[+14]SAPATGGVK[+28]	870891200	906146304	1034744512	1096857856	981598464	992161152	1270155776	1139134080	1286739200	4147999488	1843854336	1591027840	3587583232	3797570048	1810995840	2932942592	4806260224	3260764160	1288633984	2806834176	1605485568	2133197440	150104128	397719584	519176192	2161470976	1294479616	894647488	529847008	2213863424	92193752	507560160	934978944	605456640	111273968	571690432	323288896	2218268672	114864992	451225184	360937088	321517216	509933888	14584279040	1310958592	6327246848
Q5TEC6	Histone H3-7	H3PS2	K[+14]SAPATGGVK[+14]	2298650368	4855815680	0	49768	0	39603	0	6490071040	3704126464	8701023232	0	0	7529805312	16429221888	52509	11412555776	12468908032	13132226560	7193037824	14513525760	0	105796	3087553280	2542663680	1484776576	3378660864	2903006720	3026352640	1509015424	3301628160	1204877312	3111782656	1961947904	3202819072	1474392448	3315737088	1099794688	3543958528	2059600512	2875054336	867758272	1712493056	1209791616	30508152832	3252126976	11901887488
Q5TEC6	Histone H3-7	H3PS2	SAPATGGVK[+28]	595490	654589	600653	3809101	508722	855964	86577	2620497	629695	1171261	764739	631916	95055304	2093947	62966	880851840	147815	1736396	0	651503808	97905	860253	33116794	531643808	2429652	255638896	18986962	590246592	4108351	13716918	31319444	602064448	27203886	274207392	19200430	738057472	7223472	13756543	24431514	612211904	37809084	12895968	72633312	1281091840	17592544	22280004
Q5TEC6	Histone H3-7	H3PS2	SAPATGGVK[+14]	671608	0	2921985	298760	3126955	16532687	3735740	26034620	1998611	9944084	3020041	5049845	578950	8380878	9128476	16536355	214984	19993510	74023	31492556	121330	4076319	13530657	1329286656	18003052	48016248	10781170	1347018112	10273566	38150096	314268	1357883392	14796499	22039952	9148408	1679009152	11341654	27487714	7800363	1447514624	87142576	53564500	10964929	2236758784	65124920	72440592
Q5TEC6	Histone H3-7	H3PS2	K[+28]SAPATGGVKKPHR	0	92879	0	380912	217444	620920	0	199523	0	34165	0	0	0	0	795013	29382110	4573166	5415611	0	605517	366193	0	3551557	330531	0	198748	764776	185210	187613	0	1447026	114684	0	0	2185684	218178	9644	0	2512857	247256	0	0	60830	16661155	21042	155697
Q5TEC6	Histone H3-7	H3PS2	K[+28]SAPATGGVKKPHR	0	0	0	0	0	0	0	0	0	0	0	0	0	0	2120595	0	0	0	0	792549	2471435	0	0	1413360	0	0	0	1030784	0	0	0	0	202216	0	0	1151471	0	0	0	1043857	77022	144479	144626	39584604	54383	0
Q5TEC6	Histone H3-7	H3PS2	K[+28]SAPATGGVKKPHR	1011528	239575	1840988	963754	2737311	2579802	3260213	1200184	2220963	35190	1181602	5101039	0	652107	1698065	54735100	2388132	4570679	0	5033496	2364980	0	6778090	1334160	257322	663572	5287557	795172	2366166	177011	2066245	366178	99408	225626	5844995	760718	39453	92121	4675048	941328	110261	111922	75122	25246956	81008	1358944
Q5TEC6	Histone H3-7	H3PS2	KSAPATGGVK[+28]KPHR	48837	1763153	0	52632	558597	7352201	12876510	671246	13573442	6242722	58612	11764948	2422244	54045880	1452479	54679412	11460172	5889640	6933489	2660809	2855926	192650	19511554	1545433	962553	423613	5741062	1263780	485562	311563	6992266	1470619	509032	207066	993364	1313204	1963968	681307	6658137	1069326	242299	1273497	4873274	36418712	609006	126159
Q5TEC6	Histone H3-7	H3PS2	KSAPATGGVK[+42]KPHR	0	0	0	0	0	19406	883879	0	0	0	0	1685642	251779	0	0	0	0	0	0	0	1162709	0	24415	1088511	31101	15856	10136	759733	277781	0	0	610104	64338	85288	161249	557707	325310	30757	2124413	760017	51399	89493	23863	91000768	210147	0
Q5TEC6	Histone H3-7	H3PS2	KSAPATGGVK[+42]KPHR	0	0	0	0	0	0	0	0	0	0	0	0	1249014	0	0	0	0	0	0	0	7251707	0	0	4368814	301978	0	0	4257660	0	62875	0	3181959	0	320532	0	2804232	0	70233	0	3219168	267516	924558	158811	149157040	345423	0
Q5TEC6	Histone H3-7	H3PS2	KSAPATGGVKK[+42]PHR	0	0	405763	0	732740	0	131283	0	1691993	0	0	265836	0	0	261408	0	3280658	0	0	0	1128396	253251	5882	463521	361249	15890	26296	771714	729809	15056	0	629074	63930	93063	279639	558421	326921	5084	1064499	688829	723593	7607	0	88792288	0	0
Q5TEC6	Histone H3-7	H3PS2	K[+28]SAPATGGVK[+28]KPHR	0	0	0	0	0	0	0	40333	2919675	1565089	2606174	2558601	0	0	0	203349	0	432336	0	1001112	687656	0	799700	2853809	195495	14373	595158	2420631	702491	349068	702780	1614694	667442	202241	472943	1658812	737365	280775	387983	2155601	691592	0	1514683	137803968	10533730	99284
Q5TEC6	Histone H3-7	H3PS2	K[+28]SAPATGGVK[+28]KPHR	0	25960	56901	558708	47733	0	766407	950823	0	1958014	0	0	147409	0	1056737	349449	1007390	999675	0	1257905	2624318	40891	3656671	8784334	107983	44610	1893127	7333265	40411	3246158	1412648	7298042	566100	2750048	1742068	5774060	64463	3220246	4731494	4832327	2826268	641279	873479	170372496	389712	5278606
Q5TEC6	Histone H3-7	H3PS2	K[+14]SAPATGGVK[+28]KPHR	51518	0	0	0	0	0	0	0	0	0	1182682	1667706	3392033	33132738	2597603	0	0	21664304	934308	9497284	865586	282684	17753	1089335	1191333	32160	12399	759733	278815	40733	0	610104	64316	126878	279663	558303	398824	30537	1062299	687349	720065	88389	49	90204280	208258	0
Q5TEC6	Histone H3-7	H3PS2	K[+14]SAPATGGVK[+28]KPHR	0	0	0	0	0	0	0	0	0	0	853641	0	0	25584860	0	0	0	17518206	0	10378394	0	23534	0	4402764	0	0	0	4257660	0	0	0	3181959	0	387247	0	2816877	0	70129	0	2855858	0	900626	34465	153931328	345176	0
Q5TEC6	Histone H3-7	H3PS2	K[+14]SAPATGGVK[+42]KPHR	547490	87025	94788	0	121253	2578401	0	0	0	84175	564223	0	145483	350899	0	77029	0	5466292	250850	0	451654	2849411	3266973	8776658	108031	2249554	749654	7333265	250021	341541	1026247	7298042	568228	3093156	1027501	5773577	1880802	2928352	3976672	4999021	2609952	515533	1480278	178448736	6441548	5334820
Q5TEC6	Histone H3-7	H3PS2	K[+14]SAPATGGVKK[+28]PHR	0	0	2323231	0	1229727	0	0	0	0	1717805	2222479	0	0	25520558	11537199	13872202	3197155	17268138	0	0	6577947	0	0	4395618	293711	0	19383	4257660	167366	62944	0	3181959	213549	347682	0	2809314	0	70162	0	2857656	269655	900798	167868	157461968	346726	0
Q5TEC6	Histone H3-7	H3PS2	KSAPATGGVK[+28]K[+14]PHR	598495	50066	2336216	0	1226030	0	0	0	1307882	1827068	2193165	0	1249192	25464932	9083226	0	0	113182	0	26351872	6572819	2603489	0	4418231	318778	208588	19232	4257660	167154	63019	0	3181959	518692	346452	0	2794817	7800	70178	0	3026218	273209	920331	187613	151386672	349075	0
Q5TEC6	Histone H3-7	H3PS2	K[+28]SAPATGGVKK[+14]PHR[+14]	4756104	11864518	9140898	8877563	20890760	8370946	1366217	9763096	2015990	1829449	2616708	1697475	5411906	25466080	8461430	61967528	2725271	4600075	3744408	15516935	2779123	3012387	956913	1710072	1618555	387341	748113	2184668	702092	358869	702933	1554911	672620	202311	2901342	1704094	737237	281030	509886	2170398	0	264047	1526181	139878816	4938811	193361
Q5TEC6	Histone H3-7	H3PS2	K[+14]SAPATGGVK[+14]K[+28]PHR	316884	11804337	9426707	8991224	2261550	11958893	1363903	9673625	2010336	1424039	2617586	1706072	5374016	25534316	8527028	61918932	2867602	4530641	3701914	4203437	2781057	254038	957969	2866544	1614074	387757	749181	2340828	697332	357946	703579	1565076	661406	200556	327818	1658839	737485	279383	508626	2170247	0	262026	1532329	139830864	594714	191900
Q5TEC6	Histone H3-7	H3PS2	K[+14]SAPATGGVK[+14]K[+14]PHR	320356	0	386342	0	687743	0	1776186	121671	1680358	2000728	1143413	244177	3401870	33047722	2612941	21513702	3293047	21726028	1294482	6648918	1128383	3803744	12652	463546	1160946	0	3942	771714	197288	15060	0	629074	63766	93299	279820	557911	325466	491258	2124335	687921	722902	0	0	89083768	281304	4653842
Q5TEC6	Histone H3-7	H3PS2	SAPATGGVK[+28]KPHR	0	0	175517	0	0	0	0	0	0	718317	0	217149	1087861	0	725109	1499751	0	0	242674	2836128	0	133408	303730	4610908	741810	0	251347	4250653	140643	1257529	271051	4116122	615176	1051112	99270	210048	283694	0	0	3375155	1814743	377967	1667606	107311704	10229966	0
Q5TEC6	Histone H3-7	H3PS2	SAPATGGVK[+28]KPHR	84443	1069071	83310	285644	34778	2215791	0	1233244	0	419535	83024	74360	203678	1273016	183565	0	222356	62444	68050	3365476	0	94527	146644	13446860	561563	16630649	42802	12378849	106390	731246	51615	8406131	524012	1115183	0	93143264	247957	25995690	2787022	10637588	9186229	1511129	1062621	246591280	8828020	3719707
Q5TEC6	Histone H3-7	H3PS2	SAPATGGVKK[+28]PHR	0	0	0	0	435966	0	0	0	0	0	162287	0	1088043	0	953423	0	0	0	186964	2886043	1906963	397766	331384	4950946	741918	874146	251636	4250653	119224	1241637	271105	4116122	615265	1548286	0	163746	265673	0	0	3825469	269929	377979	1668218	109010536	10233136	0
Q5TEC6	Histone H3-7	H3PS2	SAPATGGVKK[+28]PHR	77447	27288	289777	579946	405674	1749919	1409294	519021	256781	242480	0	67502	203700	282758	246075	148869	0	27706852	99596	3578844	7671326	133535	148178	14119895	555339	531165	42684	12378849	165027	496583	52957	8406131	522065	1109284	3563569	94209888	199763	26182360	2637140	4700110	23344708	1511062	1062384	244503024	8833836	189981
Q5TEC6	Histone H3-7	H3PS2	SAPATGGVKK[+14]PHR[+14]	1577564	2873	62490980	1594739	1285650	86031	174486	1667709	88364	3257814	6795089	13058523	0	35220172	16785352	24485482	12643823	27507426	9591331	7462892	0	9722869	142841	12925386	628354	13040536	1507670	12378849	706782	11178772	3822523	8406131	550224	11742816	3508643	346590	3831956	13159585	271112	14005639	9250162	1511487	1062548	242695504	8810482	25636342
Q93077	Histone H2A type 1-C (H2A-clustered histone 6) (Histone H2A/l)	H2A1C	VTIAQGGVLPNIQAVLLPK[+14]K	0	0	0	0	33971308	0	0	0	0	26336310	0	138651376	105156152	29417044	29862926	0	159629520	0	0	0	41353112	0	7362853	2760158	7511480	2331029	662371	13491653	11732688	0	6618845	6047942	27572518	936490	4186756	8925174	12656608	0	6751260	1193198	15257412	1013427	30908248	91772872	12045954	1275294
Q93077	Histone H2A type 1-C (H2A-clustered histone 6) (Histone H2A/l)	H2A1C	VTIAQGGVLPNIQAVLLPK[+14]K	0	0	0	0	18420340	0	0	0	0	35866000	0	108430048	58861336	13843239	16850344	37777	62829832	0	0	0	11532405	0	6622705	1882042	10000177	0	0	8256219	15146871	0	7960776	5496246	27929802	969838	6901507	6650418	14469744	0	7447556	1940675	13587196	3631118	25220564	196124208	9184988	0
Q93077	Histone H2A type 1-C (H2A-clustered histone 6) (Histone H2A/l)	H2A1C	VTIAQGGVLPNIQAVLLPKK[+28]	391619	576791	2879547	0	2149163	67950	3363778	792097	2019146	5812894	1844214	5906470	0	1942107	1924266	8213402	11609917	3516274	0	16980018	0	524260		951659	2843401		0	469226	4312213		1771734	0	0	741672	551663	0	8313831	0	3065171	0	0	0	344569	0	720861	591488
Q93077	Histone H2A type 1-C (H2A-clustered histone 6) (Histone H2A/l)	H2A1C	VTIAQGGVLPNIQAVLLPKK[+14]	0	8113829	9740037	0	0	2102874	0	0	0	26186822	0	0	105156152	0	27726598	0	0	10899217	0	76890184	0	0	7363518	2732726	7511867	2331029	662437	13447692	11732688	0	5421855	6048222	27562720	938464	4308528	8923609	12656608	0	6751260	1192727	15257412	1023476	27815424	86686168	12049950	1275294
Q93077	Histone H2A type 1-C (H2A-clustered histone 6) (Histone H2A/l)	H2A1C	VTIAQGGVLPNIQAVLLPKK[+14]	0	7654371	5094854	0	0	1456778	0	0	0	35416452	0	0	58861336	0	15720377	37463	0	6649838	0	48620212	0	0	6623263	1881882	10000751	0	0	8229317	15146871	0	6687347	5473849	27923184	971882	7240283	6647184	14469744	0	7447556	1840152	13587196	3635417	22526130	203208784	9441976	0
Q9P2N6	KAT8 regulatory NSL complex subunit 3 (NSL complex protein NSL3) (Non-specific lethal 3 homolog) (Serum inhibited-related protein) (Testis development protein PRTD)	KANL3	ALQSDR[+14]LAR	352659	0	629484	0	362464	7580	0	0	423516	494981	101302	1124573	88328	112320	611192	13701	0	382259	636216	1927222	519959	14678	811418	2352219	46068	1069766	517404	4035487	1364026	506983	414583	2986167	34293	429576	746276	3342155	303400	126106	215520	3771287	5340556	387064	2099742	77098400	488433	1129894
Q9P2N6	KAT8 regulatory NSL complex subunit 3 (NSL complex protein NSL3) (Non-specific lethal 3 homolog) (Serum inhibited-related protein) (Testis development protein PRTD)	KANL3	ALQSDR[+14]LAR	0	0	0	0	0	0	0	0	0	0	0	0	0	0	7379	52	0	0	0	0	0	0	0	285268	0	0	0	425189	86164	0	0	74230	0	0	0	375309	0	112026	0	396535	1075109	0	848191	18572074	251630	0
Q9P2N6	KAT8 regulatory NSL complex subunit 3 (NSL complex protein NSL3) (Non-specific lethal 3 homolog) (Serum inhibited-related protein) (Testis development protein PRTD)	KANL3	ALQSDRLAR[+14]	365847	0	968545	184885	438819	73778	203408	53774	424373	149988	131881	1104038	0	0	1521561	614026	768934	309466	1043640	0	3402633	931294	2457447	2352219	46068	1069390	249355	4035487	2281063	506983	414669	2983606	34293	429500	746270	3346569	303400	126106	244470	3771287	5340752	318326	1949580	77098400	488433	1127505
A2RUB1	Meiosis-specific coiled-coil domain-containing protein MEIOC (Meiosis-specific with coiled-coil domain protein)	MEIOC	K[+14]LANGTPETPTVEADTYTK	2989278	0	0	0	165752	0	1108193	0	968671	2689988	0	19228676	0	0	6106667	18320176	0	12893150	0	22764098	1571230	0	0	0	0	0	0	0	0	0	250844	0	0	0	0	0	0	0	1545276	0	0	0	0	77615	991276	0
Q7L7L0	Histone H2A type 3 (H2A-clustered histone 25)	H2A3	VTIAQGGVLPNIQAVLLPK[+14]K	0	0	0	0	33971308	0	0	0	0	26336310	0	138651376	105156152	29417044	29862926	0	159629520	0	0	0	41353112	0	7362853	2760158	7511480	2331029	662371	13491653	11732688	0	6618845	6047942	27572518	936490	4186756	8925174	12656608	0	6751260	1193198	15257412	1013427	30908248	91772872	12045954	1275294
Q7L7L0	Histone H2A type 3 (H2A-clustered histone 25)	H2A3	VTIAQGGVLPNIQAVLLPK[+14]K	0	0	0	0	18420340	0	0	0	0	35866000	0	108430048	58861336	13843239	16850344	37777	62829832	0	0	0	11532405	0	6622705	1882042	10000177	0	0	8256219	15146871	0	7960776	5496246	27929802	969838	6901507	6650418	14469744	0	7447556	1940675	13587196	3631118	25220564	196124208	9184988	0
Q7L7L0	Histone H2A type 3 (H2A-clustered histone 25)	H2A3	VTIAQGGVLPNIQAVLLPKK[+28]	391619	576791	2879547	0	2149163	67950	3363778	792097	2019146	5812894	1844214	5906470	0	1942107	1924266	8213402	11609917	3516274	0	16980018	0	524260		951659	2843401		0	469226	4312213		1771734	0	0	741672	551663	0	8313831	0	3065171	0	0	0	344569	0	720861	591488
Q7L7L0	Histone H2A type 3 (H2A-clustered histone 25)	H2A3	VTIAQGGVLPNIQAVLLPKK[+14]	0	8113829	9740037	0	0	2102874	0	0	0	26186822	0	0	105156152	0	27726598	0	0	10899217	0	76890184	0	0	7363518	2732726	7511867	2331029	662437	13447692	11732688	0	5421855	6048222	27562720	938464	4308528	8923609	12656608	0	6751260	1192727	15257412	1023476	27815424	86686168	12049950	1275294
Q7L7L0	Histone H2A type 3 (H2A-clustered histone 25)	H2A3	VTIAQGGVLPNIQAVLLPKK[+14]	0	7654371	5094854	0	0	1456778	0	0	0	35416452	0	0	58861336	0	15720377	37463	0	6649838	0	48620212	0	0	6623263	1881882	10000751	0	0	8229317	15146871	0	6687347	5473849	27923184	971882	7240283	6647184	14469744	0	7447556	1840152	13587196	3635417	22526130	203208784	9441976	0
P16402	Histone H1.3 (Histone H1c) (Histone H1s-2)	H13	K[+14]ASGPPVSELITK	0	4222363648	0	3493212672	0	583044	0	1020551	13276550144	1942835	0	0	1733035	41215754240	15046349824	36615323648	14358501376	7520362	7302944768	4131379	6223761920	2624125	2639688192	587201536	3019675136	721506752	2157644032	415059744	1670612096	697070144	2745829632	343681888	523657632	704039232	3390003712	467504000	2372353536	727248064	2753300736	454617056	1129606272	360107232	4739689984	13436000256	3978729728	10869523456
P16402	Histone H1.3 (Histone H1c) (Histone H1s-2)	H13	K[+14]ASGPPVSELITK	0	1148157312	0	852259520	0	91695	0	0	565350976	96053	0	0	0	10060332032	2167005952	7843282432	1856426752	318195	1074190080	1008534	709368512	431937	274207392	346215360	601792512	286768576	194500736	301845888	601544512	323258336	105709408	261930176	14415295	245050544	141569216	331924960	728187520	314994624	323618016	315817536	41517404	223949520	1053234880	8111057408	1013554176	4564786176
P16402	Histone H1.3 (Histone H1c) (Histone H1s-2)	H13	SGVSLAALK[+14]K	0	1296509	264595	1369972	0	259176	652573	0	1445536	177920	230782	524102	316355	0	487342	471634	321878	980083	8134722	0	11768118	0	1188746	1542072	5297264	3810885	337290	3798679	2553377	37853	0	2761999	5649602	2065099	232110	949112	3556072	2341839	0	5046307	5818536	0	266808	458517472	35309504	74461792
P16402	Histone H1.3 (Histone H1c) (Histone H1s-2)	H13	SGVSLAALKK[+14]	0	1296509	189214	1373349	0	853536	0	0	0	1174379	0	512521	0	4979603	495304	473342	336520	0	7967486	0	2613452	0	1188720	1536781	5291547	0	337418	3798773	2568817	2345271	0	2763352	5640744	2064575	153551	966262	3564453	2414664	0	5046394	5817011	0	267062	458704000	35213264	74301552
P16402	Histone H1.3 (Histone H1c) (Histone H1s-2)	H13	K[+28]ALAAAGYDVEK	1032088	0	38899	1914683	0	0	888815	2725784	3604714	0	42731	720392	0	0	302011	3436247	0	369844	0	4431879	12633208	4972470	5482722	3482388	0	4889575	4759770	4399105	1347513	3918765	5250984	1523687	0	7788763	3998973	8692715	443036	2281750	303395	5247831	1604153	5717960	211231	11114346	3718462	1874999
P16402	Histone H1.3 (Histone H1c) (Histone H1s-2)	H13	K[+14]ALAAAGYDVEK	0	14613	0	1681670	0	0	0	0	0	7548	194671808	200317440	0	0	87579288	0	79338008	109022112	40718284	137038896	0	0	46133096	7503907	5031105	4337488	30360950	7535831	10204935	3387169	53279572	5132489	5314056	4463263	36728716	9606653	397412	4380790	23442034	9217290	1035607	2497494	61309944	1115716	7396339	13777622
P16402	Histone H1.3 (Histone H1c) (Histone H1s-2)	H13	K[+14]ALAAAGYDVEK	0	0	0	1249724	0	39344	0	30946	0	0	21572516	28427996	0	0	6053620	443334	6255252	13064931	3250128	26169696	0	0	2156492	2478740	0	835760	1239057	2192004	737915	907274	1447976	1801276	0	620064	0	3670860	0	890625	0	2763780	283705	580208	4877442	170150	0	3826771
P52945	Pancreas/duodenum homeobox protein 1 (PDX-1) (Glucose-sensitive factor) (GSF) (Insulin promoter factor 1) (IPF-1) (Insulin upstream factor 1) (IUF-1) (Islet/duodenum homeobox-1) (IDX-1) (Somatostatin-transactivating factor 1) (STF-1)	PDX1	LPPGLSASPQPSSVAPR[+28]	12736075	2877200	17792066	8770964	18848512	0	17467242	8717298	15571637	0	34901176	30429160	6328317	12410844	17094030	23372738	15631320	0	5556702	34065164	3800599	0	5821938	3311310	16048702	155289	4807062	3438823	11634464	3456410	10825847	2507213	1976340	1938820	4849228	4257985	21932620	700280	11634264	3665993	3641237	880261	23308054	25095372	5210058	13890568
O95613	Pericentrin (Kendrin) (Pericentrin-B)	PCNT	R[+14]EDLEQLQQK[+28]	285777824	232791456	494916224	0	0	0	364452448	60925	306880864	324979840	0	733914688	0	89903	0	0	0	143968	0	98210	0	0	224918960	9977553	50500756	22914714	115881160	8070584	60190684	14976329	157450720	3853484	228878	19017162	532495	26666522	62397816	17711204	563057	11134204	1353830	20633966	85334296	1173397	176097584	82467
O95785	Protein Wiz (Widely-interspaced zinc finger-containing protein) (Zinc finger protein 803)	WIZ	SPQLSLSPRPASPK[+28]	0	0	0	0	0	577039	272955	0	0	0	3537163	0	2578433	0	1475771	0	4268521	0	1622035	0	572447	0	321558	0	0	157646	7609696	535627	0	78595	1523478	20358	16261897	0	609093	477950	221251	0	5224091	0	2451601	0	10121059	0	7395392	681087
P35579	Myosin-9 (Cellular myosin heavy chain, type A) (Myosin heavy chain 9) (Myosin heavy chain, non-muscle IIa) (Non-muscle myosin heavy chain A) (NMMHC-A) (Non-muscle myosin heavy chain IIa) (NMMHC II-a) (NMMHC-IIA)	MYH9	LQVELDNVTGLLSQSDSK[+14]	0	0	3005126	328567	1157510	708045	975054	863396	195737	0	6151081	724170	454840	1644305	402586	1458793	3366706	5980758	508861	174241	555039	0	991742	1554293	3708488	0	938055	132167	2849891	0	567691	461242	0	0	131455	71377	1905751		688646	953909	0	0	7352489	1225935	1127597	1085326
P19338	Nucleolin (Protein C23)	NUCL	NLPYKVTQDELKEVFEDAAEIR[+28]	11435804	0	13329126	0	550638	0	20925220	0	13477641	846532	4274500	15227843	0	8556374	2564687	3858287	0	0	0	2023076	0	0	759590	0	0	0	0	0	0	972976	2339750	136024	0	0	1342625	470568		0	0	380809	0		7505357	0	748277	0
P19338	Nucleolin (Protein C23)	NUCL	VTQDELKEVFEDAAEIR[+28]	29162922	17266084	50817716	6196677	15806989	5740147	40258176	5551918	20229924	55382200	89706256	47010492	0	45043480	1117081	1069890	30888684	0	0	39854780	0	0	5145258	0	2507951	227380	6151917	1233047	2692642	0	11801707	24168	1153838	780806	7193305	0	2357462	0	15023034	0	580975	701984	16452220	0	5708373	141403
P19338	Nucleolin (Protein C23)	NUCL	VTQDELKEVFEDAAEIR[+28]	15864969	8202975	29742774	2624833	8340909	3962847	20072972	3058248	11274614	36255004	60892228	26747740	0	22070228	1653908	0	20966110	0	0	19227856	0	0	2377935	0	0	0	2317332	0	1226548	0	6888171	39407	1039134	0	2794839	56189	1186582	0	8948512	16941	0	0	5810378	0	1887379	0
P19338	Nucleolin (Protein C23)	NUCL	TLFVKGLSEDTTEETLKESFDGSVR[+14]	2218523	0	5310416	181667	0	0	2787627	0	1717693	0	2932200	10429640	1714778	0	328274	0	1631834	596040	0	0	0	0	0	619851	185309	52142	0	0	0	0	0	0	0	0	0	492030	0	0	0	209865	528592	0	8342631	529862	468117	0
P19338	Nucleolin (Protein C23)	NUCL	GLSEDTTEETLKESFDGSVR[+14]	0	3200692	30132662	147553	15618303	960535	0	207889	229247	0	54986688	74981376	0	19564068	48198344	0	33346440	78565	11466481	0	11594821	0	0	0	0	0	0	0	0	0	0	0	0	0	0	0	0	0	0	0	0	0	0	0	0	0
P19338	Nucleolin (Protein C23)	NUCL	GLSEDTTEETLKESFDGSVR[+14]	0	5276863	32833726	568273	12031893	2010331	0	55568	0	0	77414856	91242872	0	25009042	51486360	0	31897208	0	14929942	37765	12965272	0	1019625	1904429	0	128559	8181264	1488408	456539	0	11181484	581855	0	0	7828389	1035974	0	0	13068019	790798	262845	0	26191264	828522	1904540	0
P10412	Histone H1.4 (Histone H1b) (Histone H1s-4)	H14	K[+14]ASGPPVSELITK	0	4222363648	0	3493212672	0	583044	0	1020551	13276550144	1942835	0	0	1733035	41215754240	15046349824	36615323648	14358501376	7520362	7302944768	4131379	6223761920	2624125	2639688192	587201536	3019675136	721506752	2157644032	415059744	1670612096	697070144	2745829632	343681888	523657632	704039232	3390003712	467504000	2372353536	727248064	2753300736	454617056	1129606272	360107232	4739689984	13436000256	3978729728	10869523456
P10412	Histone H1.4 (Histone H1b) (Histone H1s-4)	H14	K[+14]ASGPPVSELITK	0	1148157312	0	852259520	0	91695	0	0	565350976	96053	0	0	0	10060332032	2167005952	7843282432	1856426752	318195	1074190080	1008534	709368512	431937	274207392	346215360	601792512	286768576	194500736	301845888	601544512	323258336	105709408	261930176	14415295	245050544	141569216	331924960	728187520	314994624	323618016	315817536	41517404	223949520	1053234880	8111057408	1013554176	4564786176
P10412	Histone H1.4 (Histone H1b) (Histone H1s-4)	H14	SGVSLAALK[+14]K	0	1296509	264595	1369972	0	259176	652573	0	1445536	177920	230782	524102	316355	0	487342	471634	321878	980083	8134722	0	11768118	0	1188746	1542072	5297264	3810885	337290	3798679	2553377	37853	0	2761999	5649602	2065099	232110	949112	3556072	2341839	0	5046307	5818536	0	266808	458517472	35309504	74461792
P10412	Histone H1.4 (Histone H1b) (Histone H1s-4)	H14	SGVSLAALKK[+14]	0	1296509	189214	1373349	0	853536	0	0	0	1174379	0	512521	0	4979603	495304	473342	336520	0	7967486	0	2613452	0	1188720	1536781	5291547	0	337418	3798773	2568817	2345271	0	2763352	5640744	2064575	153551	966262	3564453	2414664	0	5046394	5817011	0	267062	458704000	35213264	74301552
P10412	Histone H1.4 (Histone H1b) (Histone H1s-4)	H14	K[+28]ALAAAGYDVEK	1032088	0	38899	1914683	0	0	888815	2725784	3604714	0	42731	720392	0	0	302011	3436247	0	369844	0	4431879	12633208	4972470	5482722	3482388	0	4889575	4759770	4399105	1347513	3918765	5250984	1523687	0	7788763	3998973	8692715	443036	2281750	303395	5247831	1604153	5717960	211231	11114346	3718462	1874999
P10412	Histone H1.4 (Histone H1b) (Histone H1s-4)	H14	K[+14]ALAAAGYDVEK	0	14613	0	1681670	0	0	0	0	0	7548	194671808	200317440	0	0	87579288	0	79338008	109022112	40718284	137038896	0	0	46133096	7503907	5031105	4337488	30360950	7535831	10204935	3387169	53279572	5132489	5314056	4463263	36728716	9606653	397412	4380790	23442034	9217290	1035607	2497494	61309944	1115716	7396339	13777622
P10412	Histone H1.4 (Histone H1b) (Histone H1s-4)	H14	K[+14]ALAAAGYDVEK	0	0	0	1249724	0	39344	0	30946	0	0	21572516	28427996	0	0	6053620	443334	6255252	13064931	3250128	26169696	0	0	2156492	2478740	0	835760	1239057	2192004	737915	907274	1447976	1801276	0	620064	0	3670860	0	890625	0	2763780	283705	580208	4877442	170150	0	3826771
P10412	Histone H1.4 (Histone H1b) (Histone H1s-4)	H14	ATGAATPKK[+42]SAK	0	0	11103	0	0	0	72034	0	12796	0	0	780014	882979	365704	1369633	0	905153	0	102661	14904	0	31303	182331	0	1058794	0	117992	0	337440	0	0	0	616518	0	37813	0	1270544	0	157673	0	233545	0	456147	18602976	1399469	573887
P10412	Histone H1.4 (Histone H1b) (Histone H1s-4)	H14	ATGAATPK[+14]K[+28]SAK	0	0	10997	0	0	0	65321	0	12916	0	53387	767741	884805	0	1241727	0	496853	0	112562	0	0	0	183983	0	1061569	0	118060	0	337335	0	0	0	616243	0	37812	0	938812	0	0	0	235715	0	456018	18460372	1402221	418428
P10412	Histone H1.4 (Histone H1b) (Histone H1s-4)	H14	ATGAATPK[+14]KSAK[+28]	0	0	197868	0	0	0	68942	0	71163	0	55756	772497	1655028	0	1368774	0	905153	0	0	0	178195	31059	183194	0	1059664	0	117992	0	337387	0	0	0	616446	0	37811	0	1270544	0	157453	0	233402	0	456098	18441742	1399469	574352
P34932	Heat shock 70 kDa protein 4 (HSP70RY) (Heat shock 70-related protein APG-2)	HSP74	QIQQYMKIISSFK[+14]	0	340173	1323558	934960	367851	3800	1120950	292893	287923	289953	0	0	138034080	41550132	54916596	0	100749128	48371444	31193844	635768128	52014204	89440168	10498868	13478022	17723784	7299868	6544361	11379889	13372462	3631744	6524016	9409724	26107992	7156658	4960192	10560317	15514731	77887792	5851451	11145240	21705528	42659092	351933280	17568002	115264416	91819888
Q5SSJ5	Heterochromatin protein 1-binding protein 3 (Protein HP1-BP74)	HP1B3	SSAVDPEPQVK[+14]LEDVLPLAFTR	5095251	3524478	0	445928	0	0	0	592473	0	2411995	2001821	0	0	23009218	0	0	0	0	0	27344796	0	2268872	0	0	493289	0	0	0	0		0	0	0	0	0	0	0	0	635297	182724	0	0	0	0	0	0
Q5SSJ5	Heterochromatin protein 1-binding protein 3 (Protein HP1-BP74)	HP1B3	SSAVDPEPQVKLEDVLPLAFTR[+14]	5290858	3521757	0	0	0	0	0	929755	0	2403656	2013960	0	0	22675154	0	17668704	0	20941890	0	0	0	2267336	0	0	493213	0	0	0	0		0	0	0	0	0	0	0	0	635625	182684	0	0	0	0	0	0
P43116	Prostaglandin E2 receptor EP2 subtype (PGE receptor EP2 subtype) (PGE2 receptor EP2 subtype) (Prostanoid EP2 receptor)	PE2R2	EK[+42]WDLQALR	4558537	1224662	10934036	511216	2579061	297937	1033850	0	3438594	2257908	2632294	5260883	3242557	30705936	12555323	52108276	13497109	34072300	6534715	50247796	25557472	32964730	1777460	3432196	1452936	0	2508941	3009488	2811996	494745	566806	2544671	2042980	447973	2310681	1835044	4412355	123222	0	2653797	906373	0	484238	515866944	0	1732444
Q13237	cGMP-dependent protein kinase 2 (cGK 2) (cGK2) (EC 2.7.11.12) (cGMP-dependent protein kinase II) (cGKII)	KGP2	DAEIQER[+28]EYHLKELR[+28]	0	3783362	5664920	3355309	0	4568651	1591704	4964360	0	6597746	0	5579222	4192175	11950078	1610433	16417354	0	0	0	11242876	0	7605252	862647	1127215	0	603502	2248047	0	183420	18143	2055023	0	0	134941	324554	72081	191600	0	1268618	222217	0	292714	1986055	521895	854127	0
P09874	Poly [ADP-ribose] polymerase 1 (PARP-1) (EC 2.4.2.30) (ADP-ribosyltransferase diphtheria toxin-like 1) (ARTD1) (DNA ADP-ribosyltransferase PARP1) (EC 2.4.2.-) (NAD(+) ADP-ribosyltransferase 1) (ADPRT 1) (Poly[ADP-ribose] synthase 1) (Protein poly-ADP-ribosyltransferase PARP1) (EC 2.4.2.-) [Cleaved into: Poly [ADP-ribose] polymerase 1, processed C-terminus (Poly [ADP-ribose] polymerase 1, 89-kDa f…	PARP1	VVSEDFLQDVSASTK[+14]	139254880	0	215299712	0	165627360	145076480	175194480	109772312	141833056	168468976	282539584	273931552	39348108	0	169014416	0	39568224	429521632	60505920	224141712	25512310	0	34485196	17709740	12540540	9015434	43441376	15585557	7211775	6641516	40955652	6551820	16101403	9049995	25283462	25421120	6965351	7123055	84536664	6419868	6587600	7472741	560848000	1723396	93816832	7656089
Q9H0M4	Zinc finger CW-type PWWP domain protein 1	ZCPW1	KEGQGNSDSDQPGPK[+42]	649835	1503606528	7928785	1588371712	196205312	30625	152228688	2191568384	525001	2034735616	1570750	1302311	2825326	1924045312	266720	133265	354132	1377000960	6431298	2740371	589580	1043329	115909	321076000	26045206	573583872	108209	365292512	23860198	721962048	1831867	411818272	3074627	584107584	49906680	470070848	35463268	806327488	108842	395152352	142118	322671072	698880	5752811520	355714	2164349696
Q9H0E3	Histone deacetylase complex subunit SAP130 (130 kDa Sin3-associated polypeptide) (Sin3-associated polypeptide p130)	SP130	KPATDGAK[+14]PK	17866	6618951	0	9143383	696511	5255350	0	26323882	0	0	0	113038	25934	6046707	0	4129651	0	0	0	3574457	0	0	214129	1164834	833884	680250	115196	948345	801210	7480425	203290	220485	258093	659274	159198	44780	482925	20040808	156918	1114467	303610	14279643	192462	2612720	234896	60814748
P09651	Heterogeneous nuclear ribonucleoprotein A1 (hnRNP A1) (Helix-destabilizing protein) (Single-strand RNA-binding protein) (hnRNP core protein A1) [Cleaved into: Heterogeneous nuclear ribonucleoprotein A1, N-terminally processed]	ROA1	GFAFVTFDDHDSVDK[+14]	0	0	7065435	0	0	0	0	0	0	0	5152353	0	0	0	21525976	270576	3040330	0	5055427	180691	900730	0	0	267618	0	0	0	0	0	0	0	37339	0	0	448811	478497	276427	0	620066	113823	0	0	2308329	0	753432	0
P09651	Heterogeneous nuclear ribonucleoprotein A1 (hnRNP A1) (Helix-destabilizing protein) (Single-strand RNA-binding protein) (hnRNP core protein A1) [Cleaved into: Heterogeneous nuclear ribonucleoprotein A1, N-terminally processed]	ROA1	GFAFVTFDDHDSVDK[+14]	0	0	934188	0	16699	0	13477	0	0	113783	0	0	0	0	0	0	475074	0	0	0	60847	64728	0	0	0	38079	0	38347	126210	0	0	37856	205835	41744	0	0	0	0	166169	0	170769	0	1839323	129846	889485	431389
P16401	Histone H1.5 (Histone H1a) (Histone H1b) (Histone H1s-3)	H15	K[+14]ALAAGGYDVEK	197694480	0	280779968	111617	0	0	26923	2752	0	1534800640	438205	409440	502471552	3371326976	125131	3298040320	0	6824938496	236136448	8919398400	262511424	4528889856	402358144	294444224	51040532	80184824	408363424	251302528	47459612	75774632	340836384	180720896	104521568	65801592	373606368	291361600	42704900	64059208	254390592	290726368	114137048	60428056	495750432	61322592	82248416	164544912
P16401	Histone H1.5 (Histone H1a) (Histone H1b) (Histone H1s-3)	H15	K[+14]ALAAGGYDVEK	16289394	329902	24797948	0	0	0	0	0	0	202610096	0	0	34915004	370610880	0	378879392	0	1038738752	20316642	1534655232	25302738	907422016	32344778	85912704	6068979	15884674	31450624	79061592	6204078	14823393	29119882	55960464	43643032	11802517	29660688	83131352	4976153	12208440	62468208	77599176	16071070	13340689	51430860	13276456	40155996	25943916
Q6FI13	Histone H2A type 2-A (H2A-clustered histone 18) (H2A-clustered histone 19) (Histone H2A.2) (Histone H2A/o)	H2A2A	VTIAQGGVLPNIQAVLLPK[+14]K	0	0	0	0	33971308	0	0	0	0	26336310	0	138651376	105156152	29417044	29862926	0	159629520	0	0	0	41353112	0	7362853	2760158	7511480	2331029	662371	13491653	11732688	0	6618845	6047942	27572518	936490	4186756	8925174	12656608	0	6751260	1193198	15257412	1013427	30908248	91772872	12045954	1275294
Q6FI13	Histone H2A type 2-A (H2A-clustered histone 18) (H2A-clustered histone 19) (Histone H2A.2) (Histone H2A/o)	H2A2A	VTIAQGGVLPNIQAVLLPK[+14]K	0	0	0	0	18420340	0	0	0	0	35866000	0	108430048	58861336	13843239	16850344	37777	62829832	0	0	0	11532405	0	6622705	1882042	10000177	0	0	8256219	15146871	0	7960776	5496246	27929802	969838	6901507	6650418	14469744	0	7447556	1940675	13587196	3631118	25220564	196124208	9184988	0
Q6FI13	Histone H2A type 2-A (H2A-clustered histone 18) (H2A-clustered histone 19) (Histone H2A.2) (Histone H2A/o)	H2A2A	VTIAQGGVLPNIQAVLLPKK[+28]	391619	576791	2879547	0	2149163	67950	3363778	792097	2019146	5812894	1844214	5906470	0	1942107	1924266	8213402	11609917	3516274	0	16980018	0	524260		951659	2843401		0	469226	4312213		1771734	0	0	741672	551663	0	8313831	0	3065171	0	0	0	344569	0	720861	591488
Q6FI13	Histone H2A type 2-A (H2A-clustered histone 18) (H2A-clustered histone 19) (Histone H2A.2) (Histone H2A/o)	H2A2A	VTIAQGGVLPNIQAVLLPKK[+14]	0	8113829	9740037	0	0	2102874	0	0	0	26186822	0	0	105156152	0	27726598	0	0	10899217	0	76890184	0	0	7363518	2732726	7511867	2331029	662437	13447692	11732688	0	5421855	6048222	27562720	938464	4308528	8923609	12656608	0	6751260	1192727	15257412	1023476	27815424	86686168	12049950	1275294
Q6FI13	Histone H2A type 2-A (H2A-clustered histone 18) (H2A-clustered histone 19) (Histone H2A.2) (Histone H2A/o)	H2A2A	VTIAQGGVLPNIQAVLLPKK[+14]	0	7654371	5094854	0	0	1456778	0	0	0	35416452	0	0	58861336	0	15720377	37463	0	6649838	0	48620212	0	0	6623263	1881882	10000751	0	0	8229317	15146871	0	6687347	5473849	27923184	971882	7240283	6647184	14469744	0	7447556	1840152	13587196	3635417	22526130	203208784	9441976	0
Q99878	Histone H2A type 1-J (Histone H2A/e)	H2A1J	VTIAQGGVLPNIQAVLLPK[+14]K	0	0	0	0	33971308	0	0	0	0	26336310	0	138651376	105156152	29417044	29862926	0	159629520	0	0	0	41353112	0	7362853	2760158	7511480	2331029	662371	13491653	11732688	0	6618845	6047942	27572518	936490	4186756	8925174	12656608	0	6751260	1193198	15257412	1013427	30908248	91772872	12045954	1275294
Q99878	Histone H2A type 1-J (Histone H2A/e)	H2A1J	VTIAQGGVLPNIQAVLLPK[+14]K	0	0	0	0	18420340	0	0	0	0	35866000	0	108430048	58861336	13843239	16850344	37777	62829832	0	0	0	11532405	0	6622705	1882042	10000177	0	0	8256219	15146871	0	7960776	5496246	27929802	969838	6901507	6650418	14469744	0	7447556	1940675	13587196	3631118	25220564	196124208	9184988	0
Q99878	Histone H2A type 1-J (Histone H2A/e)	H2A1J	VTIAQGGVLPNIQAVLLPKK[+28]	391619	576791	2879547	0	2149163	67950	3363778	792097	2019146	5812894	1844214	5906470	0	1942107	1924266	8213402	11609917	3516274	0	16980018	0	524260		951659	2843401		0	469226	4312213		1771734	0	0	741672	551663	0	8313831	0	3065171	0	0	0	344569	0	720861	591488
Q99878	Histone H2A type 1-J (Histone H2A/e)	H2A1J	VTIAQGGVLPNIQAVLLPKK[+14]	0	8113829	9740037	0	0	2102874	0	0	0	26186822	0	0	105156152	0	27726598	0	0	10899217	0	76890184	0	0	7363518	2732726	7511867	2331029	662437	13447692	11732688	0	5421855	6048222	27562720	938464	4308528	8923609	12656608	0	6751260	1192727	15257412	1023476	27815424	86686168	12049950	1275294
Q99878	Histone H2A type 1-J (Histone H2A/e)	H2A1J	VTIAQGGVLPNIQAVLLPKK[+14]	0	7654371	5094854	0	0	1456778	0	0	0	35416452	0	0	58861336	0	15720377	37463	0	6649838	0	48620212	0	0	6623263	1881882	10000751	0	0	8229317	15146871	0	6687347	5473849	27923184	971882	7240283	6647184	14469744	0	7447556	1840152	13587196	3635417	22526130	203208784	9441976	0
A6NNT2	Uncharacterized protein C16orf96	CP096	VGK[+42]DGAPKEAQPK	0	2637626	3814473	0	0	2038811	0	3170085	4976938	5313181	7990135	6382797	0	0	1925857	0	15729987	0	3692119	0	3278509	0	455653	0	226674	988623	2515990	0	900373	1558252	2249460	0	803871	1096732	1238486	0	326923	1255611	632893	0	439122	527220	5292758	25936604	1646088	9766861
Q6ZS10	C-type lectin domain family 17, member A (Prolectin)	CL17A	GGTWNDLSCYK[+28]	4111128	671303	0	0	2880721	24509	3330492	0	4756058	4136490	2099054	4151429	2131487	0	2574544	0	4304972	49977	14693170	0	12907309	1722472	3572567	77741	0	101169	3355289	182487	63617	56694	3055388	0	2865595	0	3250998	0	358647	121586	439233	169288	2343272	110535	13642588	0	2514912	0
Q9P1W3	Calcium permeable stress-gated cation channel 1 (Transmembrane protein 63C)	CSC1	DIEDPELIIK[+28]	7361982464	115941384	10573619200	561623616	8479199744	835968384	7745973248	5952994	7611341312	14699731968	6565857792	7026437120	0	60196962304	6208338432	55069843456	6074926080	54760534016	2390419968	40303882240	2998521344	24461522944	3945690880	2898967296	1253373440	5868668928	2984075008	3477477632	1169953920	5430161408	4760194560	2497089280	1514819072	5758264832	4036080896	5671864832	1264604928	5383094272	6407003136	4088839936	933102528	3970409728	14909497344	11039329280	3116522496	12167612416
Q7Z3E5	LisH domain-containing protein ARMC9 (Armadillo repeat-containing protein 9) (Melanoma/melanocyte-specific tumor antigen KU-MEL-1) (NS21)	ARMC9	VLQMLEGRLK[+28]	0	0	0	0	0	0	93680184	0	74145584	0	0	143129184	0	78883448	151683696	72381192	0	57107580	0	0	0	25220268	12041147	6520210	10593245	1782771	15824247	5783909	10718457	1615094	8517713	5514025	30262840	1523420	12852855	4217431	5907594	1684306	7291868	4903283	12079659	600187	90760112	77492176	60523416	0
Q8NFW1	Collagen alpha-1(XXII) chain	COMA1	SQDLVLDAAAAAHR[+28]AGIR	9089541	0	1130289	0	41787604	0	40308720	0	15423408	1594473	215963	19461376	11125502	0	29458318	0	21036938	0	4616794	3595457	0	0	44519048	705557	1573342	137590	15073962	149038	943873	0	22152852	164050	11133530	0	17891492	117930	0	0	27614056	28033	16828146	0	4676225	25629	11497925	161408
Q15059	Bromodomain-containing protein 3 (RING3-like protein)	BRD3	EYPDAQGFAADVR[+14]	2962299	117863	1904574	0	0	0	0	0	0	0	745331	373923	0	8437114	8742148	8594246	0	0	1086909	6037462	0	1793707	0	36528	0	0	0	0	0	60574	1136644	97623	0	0	201601	30220	0	0	0	0	0	56874	247400	2500774	0	0
Q01484	Ankyrin-2 (ANK-2) (Ankyrin-B) (Brain ankyrin) (Non-erythroid ankyrin)	ANK2	MTAILTTDVSDK[+28]AGSIK[+28]	1947931	0	2275456	0	197930	0	997024	0	108155	137785	2100539	2225974	0	1441840	901012	537475	555804	506414	483539	6217326	480700	1491951	352316	640946	0	1013041	0	859436	0	1170513	0	348582	404855	685884	0	485845	782549	225201	0	750117	0	106937	6334623	2551206	842880	0
Q9Y575	Ankyrin repeat and SOCS box protein 3 (ASB-3)	ASB3	ILDLLIPLTNR[+14]	107543	0	0	0	0	0	0	0	0	0	13443992	16066134	0	15879840	0	16971532	166852	2599767	19253034	316295	0	29393	0	47712	177391	0	0	0	0	0	1958052	180546	0	0	0	88967	192587	68723	307188	23997	0	0	220292	210431	409584	1854058
P27695	DNA-(apurinic or apyrimidinic site) endonuclease (EC 3.1.11.2) (APEX nuclease) (APEN) (Apurinic-apyrimidinic endonuclease 1) (AP endonuclease 1) (APE-1) (REF-1) (Redox factor-1) [Cleaved into: DNA-(apurinic or apyrimidinic site) endonuclease, mitochondrial]	APEX1	VSYGIGDEEHDQEGR[+14]	0	0	839003	0	416619	0	0	0	0	510314	2120445	505936	0	1873777	2909718	2887812	0	432321	44894	0	733806	2553095	0	35585	0	75291	0	0	0	0	1639009	0	0	0	0	0	0	0	0	0	0	0	0	0	0	0
O75976	Carboxypeptidase D (EC 3.4.17.22) (Metallocarboxypeptidase D) (gp180)	CBPD	ELLLNLIEYLCK[+42]	1976820	0	0	0	0	0	5880234	0	4898665	0	13402490	13347480	3975314	6809135	8636523	11058255	283274	10509829	0	0	171247	3080025	1389667	713362	0	0	1159946	200322	0	0	239352	99012	206694	0	77079	139375	173992	0	112261	844545	0	0	12644806	65763	6018160	248233
P35659	Protein DEK	DEK	NVGQFSGFPFEKGSVQYK[+14]	0	573809	0	0	0	0	0	0	0	0	1397514	1005185	2113741	0	0	0	0	0	0	8202	245397	434486	759134	0	0	0	0	0	0	0	0	0	0	707538	0	766742	0	0	1361446	0	0	0	6012774	165539	809176	0
P35659	Protein DEK	DEK	EESSDDEDK[+14]ESEEEPPK	0	0	285816	0	0	71612	0	0	80690	0	191436	0	0	0	0	0	447269	0	0	0	0	0	17722	0		226313	0	0	0	0	0	0	0	0	69743	76332	0	0		0		0	244078	0	0	235770
P0C0S8	Histone H2A type 1 (H2A.1) (Histone H2A/ptl)	H2A1	VTIAQGGVLPNIQAVLLPK[+14]K	0	0	0	0	33971308	0	0	0	0	26336310	0	138651376	105156152	29417044	29862926	0	159629520	0	0	0	41353112	0	7362853	2760158	7511480	2331029	662371	13491653	11732688	0	6618845	6047942	27572518	936490	4186756	8925174	12656608	0	6751260	1193198	15257412	1013427	30908248	91772872	12045954	1275294
P0C0S8	Histone H2A type 1 (H2A.1) (Histone H2A/ptl)	H2A1	VTIAQGGVLPNIQAVLLPK[+14]K	0	0	0	0	18420340	0	0	0	0	35866000	0	108430048	58861336	13843239	16850344	37777	62829832	0	0	0	11532405	0	6622705	1882042	10000177	0	0	8256219	15146871	0	7960776	5496246	27929802	969838	6901507	6650418	14469744	0	7447556	1940675	13587196	3631118	25220564	196124208	9184988	0
P0C0S8	Histone H2A type 1 (H2A.1) (Histone H2A/ptl)	H2A1	VTIAQGGVLPNIQAVLLPKK[+28]	391619	576791	2879547	0	2149163	67950	3363778	792097	2019146	5812894	1844214	5906470	0	1942107	1924266	8213402	11609917	3516274	0	16980018	0	524260		951659	2843401		0	469226	4312213		1771734	0	0	741672	551663	0	8313831	0	3065171	0	0	0	344569	0	720861	591488
P0C0S8	Histone H2A type 1 (H2A.1) (Histone H2A/ptl)	H2A1	VTIAQGGVLPNIQAVLLPKK[+14]	0	8113829	9740037	0	0	2102874	0	0	0	26186822	0	0	105156152	0	27726598	0	0	10899217	0	76890184	0	0	7363518	2732726	7511867	2331029	662437	13447692	11732688	0	5421855	6048222	27562720	938464	4308528	8923609	12656608	0	6751260	1192727	15257412	1023476	27815424	86686168	12049950	1275294
P0C0S8	Histone H2A type 1 (H2A.1) (Histone H2A/ptl)	H2A1	VTIAQGGVLPNIQAVLLPKK[+14]	0	7654371	5094854	0	0	1456778	0	0	0	35416452	0	0	58861336	0	15720377	37463	0	6649838	0	48620212	0	0	6623263	1881882	10000751	0	0	8229317	15146871	0	6687347	5473849	27923184	971882	7240283	6647184	14469744	0	7447556	1840152	13587196	3635417	22526130	203208784	9441976	0
O60641	Clathrin coat assembly protein AP180 (91 kDa synaptosomal-associated protein) (Clathrin coat-associated protein AP180) (Phosphoprotein F1-20)	AP180	IAAAQYSVTGSAVAR[+28]	0	0	51587020	0	45773096	0	0	0	0	0	47388812	52487364	11093683	125098200	59505380	105735792	55730816	112007352	36236584	0	33251092	0	423714	1131634	0	2707581	697776	1103432	3521165	2929125	548556	570821	2313382	3048095	788027	741560	1085878	2828893	516126	1086864	2805383	1340305	6384323	26728474	1661373	26037986
O60641	Clathrin coat assembly protein AP180 (91 kDa synaptosomal-associated protein) (Clathrin coat-associated protein AP180) (Phosphoprotein F1-20)	AP180	IAAAQYSVTGSAVAR[+28]	40386	0	1516592	62126	1234367	66560	0	531990	3790854	2359132	8268075	9242917	1208370	42762484	4794557	28551586	3606760	35998684	3182962	0	1520928	0	1477474	1635833	1085269	620727	49649	1638930	189082	1068657	0	1312489	143138	698737	843474	1525798	149118	1114502	1238993	1818140	0	662400	542356	40657928	312773	11426828
Q9BTM1	Histone H2A.J (H2a/j)	H2AJ	VTIAQGGVLPNIQAVLLPK[+14]K	0	0	0	0	33971308	0	0	0	0	26336310	0	138651376	105156152	29417044	29862926	0	159629520	0	0	0	41353112	0	7362853	2760158	7511480	2331029	662371	13491653	11732688	0	6618845	6047942	27572518	936490	4186756	8925174	12656608	0	6751260	1193198	15257412	1013427	30908248	91772872	12045954	1275294
Q9BTM1	Histone H2A.J (H2a/j)	H2AJ	VTIAQGGVLPNIQAVLLPK[+14]K	0	0	0	0	18420340	0	0	0	0	35866000	0	108430048	58861336	13843239	16850344	37777	62829832	0	0	0	11532405	0	6622705	1882042	10000177	0	0	8256219	15146871	0	7960776	5496246	27929802	969838	6901507	6650418	14469744	0	7447556	1940675	13587196	3631118	25220564	196124208	9184988	0
Q9BTM1	Histone H2A.J (H2a/j)	H2AJ	VTIAQGGVLPNIQAVLLPKK[+28]	391619	576791	2879547	0	2149163	67950	3363778	792097	2019146	5812894	1844214	5906470	0	1942107	1924266	8213402	11609917	3516274	0	16980018	0	524260		951659	2843401		0	469226	4312213		1771734	0	0	741672	551663	0	8313831	0	3065171	0	0	0	344569	0	720861	591488
Q9BTM1	Histone H2A.J (H2a/j)	H2AJ	VTIAQGGVLPNIQAVLLPKK[+14]	0	8113829	9740037	0	0	2102874	0	0	0	26186822	0	0	105156152	0	27726598	0	0	10899217	0	76890184	0	0	7363518	2732726	7511867	2331029	662437	13447692	11732688	0	5421855	6048222	27562720	938464	4308528	8923609	12656608	0	6751260	1192727	15257412	1023476	27815424	86686168	12049950	1275294
Q9BTM1	Histone H2A.J (H2a/j)	H2AJ	VTIAQGGVLPNIQAVLLPKK[+14]	0	7654371	5094854	0	0	1456778	0	0	0	35416452	0	0	58861336	0	15720377	37463	0	6649838	0	48620212	0	0	6623263	1881882	10000751	0	0	8229317	15146871	0	6687347	5473849	27923184	971882	7240283	6647184	14469744	0	7447556	1840152	13587196	3635417	22526130	203208784	9441976	0
P02768	Albumin	ALBU	AEFAEVSK[+42]LVTDLTK	0	1453090	1151703	3862513	337358	835625	772967	972811	473112	422523	1376398	221539	0	0	0	0	540504	0	0	0	0	0	1717509	5532617	0	0		2169789	0	2901602	3461795	1873760	0	353076	2827982	16952522	0	1177117	3500454	29699294	0	0	3045043	12646388	399693	0
Q8N5X7	Eukaryotic translation initiation factor 4E type 3 (eIF-4E type 3) (eIF-4E3) (eIF4E type 3) (eIF4E-3)	IF4E3	MALPPAAAPPAGAR[+14]EPPGSR	3287711	177335	0	158769	5116013	971496	0	2358748	3080828	1522367	29249154	948086	1856393	0	15824495	2381655	11793859	1419819	4633420	3148568	9218460	277290	283036	901134	1422035	1759856	782818	1672330	538866	1818935	472385	2028526	0	1814806	92524	1309806	736780	1322611	3579150	370252	298016	2294509	10851136	1716956	1650194	12408353
Q8N5X7	Eukaryotic translation initiation factor 4E type 3 (eIF-4E type 3) (eIF-4E3) (eIF4E type 3) (eIF4E-3)	IF4E3	MALPPAAAPPAGAREPPGSR[+14]	56330	1760319	134160	0	0	80065	134960752	43673	0	175672	140601	0	87994584	916937	0	0	107174776	530601	0	0	64207824	0	33265232	345870	22236918	4042127	29209786	1069271	15550231	1379273	28987940	389981	21221054	3513568	25302088	246151	20032858	3671465	43090384	1302748	14697766	140553	2720094	0	165614064	695052
Q8N5X7	Eukaryotic translation initiation factor 4E type 3 (eIF-4E type 3) (eIF-4E3) (eIF4E type 3) (eIF4E-3)	IF4E3	MALPPAAAPPAGAREPPGSR[+14]	0	348801	40226	1043588	0	1102	0	0	0	242917	0	236825	0	10366177	0	9212942	981154	6026312	227252	36490404	0	341295	0	749376	1433728	1762181	0	1672765	539278	1418233	0	549103	423557	0	361318	2467323	786903	626385	335367	2377686	0	74613	8731916	4597911	631953	12404738
Q8IUE6	Histone H2A type 2-B (H2A-clustered histone 21)	H2A2B	HLQLAVR[+14]NDEELNK	497222	0	0	0	455583	160802304	8592031744	0	193513	243469	17936716	15313135616	1165567	0	57106304	2922169	12936157184	0	5784929792	410117	6682511872	569313	120443152	109631832	84763600	23677364	120657232	62122340	113267912	7850694	120942696	30369640	126750744	30224804	115482696	39869044	97945952	20239260	87458304	55973384	225545024	17787834	568320896	96126200	373675648	12979961
Q8IUE6	Histone H2A type 2-B (H2A-clustered histone 21)	H2A2B	HLQLAVR[+14]NDEELNK	883634	508997	388408	45816	378989	65266160	2616784128	0	0	790615	597351	13920956416	3051248	100378	13077414	2055919	4895292928	0	3005052928	1304217	3282323712	614363	35253760	397664512	23312896	65280972	28060628	305085056	71529056	19630018	42478188	167368208	6785985	44675640	36666392	178995568	48455720	41049808	35524496	260348288	6133376	39631356	288348640	451249408	152892608	19503704
P20671	Histone H2A type 1-D (Histone H2A.3) (Histone H2A/g)	H2A1D	VTIAQGGVLPNIQAVLLPK[+14]K	0	0	0	0	33971308	0	0	0	0	26336310	0	138651376	105156152	29417044	29862926	0	159629520	0	0	0	41353112	0	7362853	2760158	7511480	2331029	662371	13491653	11732688	0	6618845	6047942	27572518	936490	4186756	8925174	12656608	0	6751260	1193198	15257412	1013427	30908248	91772872	12045954	1275294
P20671	Histone H2A type 1-D (Histone H2A.3) (Histone H2A/g)	H2A1D	VTIAQGGVLPNIQAVLLPK[+14]K	0	0	0	0	18420340	0	0	0	0	35866000	0	108430048	58861336	13843239	16850344	37777	62829832	0	0	0	11532405	0	6622705	1882042	10000177	0	0	8256219	15146871	0	7960776	5496246	27929802	969838	6901507	6650418	14469744	0	7447556	1940675	13587196	3631118	25220564	196124208	9184988	0
P20671	Histone H2A type 1-D (Histone H2A.3) (Histone H2A/g)	H2A1D	VTIAQGGVLPNIQAVLLPKK[+28]	391619	576791	2879547	0	2149163	67950	3363778	792097	2019146	5812894	1844214	5906470	0	1942107	1924266	8213402	11609917	3516274	0	16980018	0	524260		951659	2843401		0	469226	4312213		1771734	0	0	741672	551663	0	8313831	0	3065171	0	0	0	344569	0	720861	591488
P20671	Histone H2A type 1-D (Histone H2A.3) (Histone H2A/g)	H2A1D	VTIAQGGVLPNIQAVLLPKK[+14]	0	8113829	9740037	0	0	2102874	0	0	0	26186822	0	0	105156152	0	27726598	0	0	10899217	0	76890184	0	0	7363518	2732726	7511867	2331029	662437	13447692	11732688	0	5421855	6048222	27562720	938464	4308528	8923609	12656608	0	6751260	1192727	15257412	1023476	27815424	86686168	12049950	1275294
P20671	Histone H2A type 1-D (Histone H2A.3) (Histone H2A/g)	H2A1D	VTIAQGGVLPNIQAVLLPKK[+14]	0	7654371	5094854	0	0	1456778	0	0	0	35416452	0	0	58861336	0	15720377	37463	0	6649838	0	48620212	0	0	6623263	1881882	10000751	0	0	8229317	15146871	0	6687347	5473849	27923184	971882	7240283	6647184	14469744	0	7447556	1840152	13587196	3635417	22526130	203208784	9441976	0
Q92522	Histone H1.10 (Histone H1x)	H1X	NQPGK[+28]YSQLVVETIR	28757892	22341546	16685835	83648880	121014536	16567081	141883824	107189248	0	8087495	103898656	3219340	87583392	252142304	96758096	171069232	0	264756752	11181546	2904824	6642832	24801462	41294512	18540570	5773249	13048108	36737728	11873983	8788692	8779311	38525908	8231696	5468881	11072030	27986464	17524022	3295086	8481916	48528852	10854644	456846	3646762	214583792	3019019	27634420	11945205
Q8TE73	Dynein axonemal heavy chain 5 (Axonemal beta dynein heavy chain 5) (Ciliary dynein heavy chain 5)	DYH5	IDQLFAVGGLR[+28]	0	0	0	0	40456	0	0	0	0	0	0	0	0	0	0	0	0	0	0	0	0	0	0	0	0	114654	560980	38555	0	0	761700	93623	0	0	0	0	338705	0	0	63270	0	0	1878912	2693265	0	0
Q96KK5	Histone H2A type 1-H (H2A-clustered histone 12) (Histone H2A/s)	H2A1H	VTIAQGGVLPNIQAVLLPK[+14]K	0	0	0	0	33971308	0	0	0	0	26336310	0	138651376	105156152	29417044	29862926	0	159629520	0	0	0	41353112	0	7362853	2760158	7511480	2331029	662371	13491653	11732688	0	6618845	6047942	27572518	936490	4186756	8925174	12656608	0	6751260	1193198	15257412	1013427	30908248	91772872	12045954	1275294
Q96KK5	Histone H2A type 1-H (H2A-clustered histone 12) (Histone H2A/s)	H2A1H	VTIAQGGVLPNIQAVLLPK[+14]K	0	0	0	0	18420340	0	0	0	0	35866000	0	108430048	58861336	13843239	16850344	37777	62829832	0	0	0	11532405	0	6622705	1882042	10000177	0	0	8256219	15146871	0	7960776	5496246	27929802	969838	6901507	6650418	14469744	0	7447556	1940675	13587196	3631118	25220564	196124208	9184988	0
Q96KK5	Histone H2A type 1-H (H2A-clustered histone 12) (Histone H2A/s)	H2A1H	VTIAQGGVLPNIQAVLLPKK[+28]	391619	576791	2879547	0	2149163	67950	3363778	792097	2019146	5812894	1844214	5906470	0	1942107	1924266	8213402	11609917	3516274	0	16980018	0	524260		951659	2843401		0	469226	4312213		1771734	0	0	741672	551663	0	8313831	0	3065171	0	0	0	344569	0	720861	591488
Q96KK5	Histone H2A type 1-H (H2A-clustered histone 12) (Histone H2A/s)	H2A1H	VTIAQGGVLPNIQAVLLPKK[+14]	0	8113829	9740037	0	0	2102874	0	0	0	26186822	0	0	105156152	0	27726598	0	0	10899217	0	76890184	0	0	7363518	2732726	7511867	2331029	662437	13447692	11732688	0	5421855	6048222	27562720	938464	4308528	8923609	12656608	0	6751260	1192727	15257412	1023476	27815424	86686168	12049950	1275294
Q96KK5	Histone H2A type 1-H (H2A-clustered histone 12) (Histone H2A/s)	H2A1H	VTIAQGGVLPNIQAVLLPKK[+14]	0	7654371	5094854	0	0	1456778	0	0	0	35416452	0	0	58861336	0	15720377	37463	0	6649838	0	48620212	0	0	6623263	1881882	10000751	0	0	8229317	15146871	0	6687347	5473849	27923184	971882	7240283	6647184	14469744	0	7447556	1840152	13587196	3635417	22526130	203208784	9441976	0
A0A0A0MRZ9	Immunoglobulin lambda variable 5-52	LV552	LTCMLSSGFSVGDFWIR	0	287437	0	0	0	347579	0	333980	0	0	10722345	13477761	3373864	655710	0	0	3192776	0	3027199	412869	731425	0	0	239035	0	0	0	397015	0	0	0	134246	0	0	725074	229547	0	0	0	0	0	0	1768672	770728	0	0
A0A0A0MRZ9	Immunoglobulin lambda variable 5-52	LV552	LTCMLSSGFSVGDFWIR	0	0	0	0	0	0	0	0	0	0	15407363	14873306	0	1115382	0	0	3821723	0	3329201	555483	482224	109059	851025	817976	321846	0	1554422	1623518	3487012	0	1598187	721468	3656017	453961	0	1125479	3397218	108136	563494	280435	0	0	0	0	1864738	232491
Q16695	Histone H3.1t (H3/t) (H3t) (H3/g) (Histone H3.4)	H31T	K[+28]SAPATGGVK	10133	71874	510482	82314	69237	44970	99174	175179	300603	6093173	6412356096	68989	80760	716625	473351	145450	55090	166231	14619254	15757261	12076858	61259	2621134336	2533972480	1513927296	3391065088	2941268480	3039100160	1497966208	3283012608	1205428864	3114025728	1954453376	3195758848	1528529664	3508311808	1105079040	3528718848	2025090432	2862226688	878772288	1729545344	1200224640	30517514240	3248472832	11929141248
Q16695	Histone H3.1t (H3/t) (H3t) (H3/g) (Histone H3.4)	H31T	K[+42]SAPATGGVK	1647922	417324	11267538	35259192	8023924	35045140	10869724	43743352	13236760	42248780	926697600	73873	12049047	3820984320	4309412	2511250	13394494	10887096	1277187968	2131316	189715	2134777088	148392864	733681472	515716800	2154445056	1279306496	897748672	536384192	2228788736	92831040	978882432	924724032	1690999680	112889720	1032033920	252304960	2222041344	116442712	855703488	364367776	871576384	509357664	14520635392	1299011712	6254875648
Q16695	Histone H3.1t (H3/t) (H3t) (H3/g) (Histone H3.4)	H31T	K[+14]SAPATGGVK	5384625	1393738	507527872	918009	5841230	2335605	19210184	13504294	5271951	4469918	943794688	0	288924	15442711	4008733	16712804	33655	3969740	2415841	6319852	15291	7136399	381198336	685313984	297954880	849076288	413771904	805475008	280944384	883964672	194277296	856137856	388643104	796491840	210538288	980474368	227350144	879215296	258538816	756169280	199456624	463086976	211770144	8385864192	469746304	2889005056
Q16695	Histone H3.1t (H3/t) (H3t) (H3/g) (Histone H3.4)	H31T	KSAPATGGVK[+28]	43034	74641	5139580	140080	4368699	90434	260517	21404	3699551488	114974	50510	4872136704	0	0	0	0	12455228416	0	0	349530	92468	269132	2621134336	2533972480	1513927296	3391065088	2941268480	3039100160	1497966208	3283012608	1205428864	3114025728	1285548288	3195758848	810576192	3508311808	1105079040	3528718848	2025090432	2862226688	878772288	1729545344	1200224640	26929014784	3248472832	11929141248
Q16695	Histone H3.1t (H3/t) (H3t) (H3/g) (Histone H3.4)	H31T	KSAPATGGVK[+28]	35340	889101	57464	1889258	61069	1627340	650953	303488	8945900	1706996	370205	13789041	780942	1558097	145269	638755	15066493	552238	168083	273627	631953	2489136	3420683	20335830	15990575	22809418	4376355	23304210	18707570	23183642	2227867	22753306	5912027	20627484	1158610	28674602	12805577	24546622	5419634	21498920	7493592	13547542	5495554	11941135	18151252	28953196
Q16695	Histone H3.1t (H3/t) (H3t) (H3/g) (Histone H3.4)	H31T	KSAPATGGVK[+14]	5388532	142183	8053530	144425	74984	123673	2198210	44069	2115684	194293584	85911	380875	747397376	5487614	716659392	74421	387779	14111675	5915290	6319852	369040	445096	381198336	685313984	241518880	849076288	413771904	767068672	280944384	883964672	194277296	568901440	388643104	796491840	210538288	980474368	227350144	879215296	258538816	153600208	199456624	463086976	169791408	6679679488	469746304	2165072896
Q16695	Histone H3.1t (H3/t) (H3t) (H3/g) (Histone H3.4)	H31T	KSAPATGGVK[+14]	0	26308	0	633892	0	0	1536716	786541	0	40105	0	72262	1918274	0	1779671	0	325332	36559	5098328	0	131112	132416	972790	4454559	540888	4354525	470133	2907570	2481047	4730209	402314	2750025	1862978	4543572	561501	6134348	2266738	4959629	351826	2602368	895842	2428489	909746	33450270	3013330	8264573
Q16695	Histone H3.1t (H3/t) (H3t) (H3/g) (Histone H3.4)	H31T	K[+28]SAPATGGVK[+28]	181672080	581701	20297586	1126779	42534640	122376	1521955	641343	76603872	1492310	158677648	335009	643245440	3257330	5797521	3843682	675846336	933435	491769	517575840	417857952	356951	78828752	117866096	67185664	432578688	107987056	152337344	73798896	320580864	36611568	163557520	184474368	234277808	40875188	164486384	56746256	231811232	90744856	135107664	71811288	229994640	70930000	3055262208	335519552	1301403648
Q16695	Histone H3.1t (H3/t) (H3t) (H3/g) (Histone H3.4)	H31T	K[+28]SAPATGGVK[+14]	4995649	129277	30699	112557	295288	141939	1269159296	605558	1287640704	4144854528	932628672	786517376	64438	157306	57623	2937067008	345573	27132	8963371	4006365952	31446	75639	148392864	733681472	515716800	2154445056	1279306496	897748672	536384192	2228788736	92831040	978882432	924724032	1690999680	112889720	1032033920	252304960	2222041344	116442712	855703488	364367776	871576384	509357664	14520635392	1299011712	6254875648
Q16695	Histone H3.1t (H3/t) (H3t) (H3/g) (Histone H3.4)	H31T	K[+42]SAPATGGVK[+28]	13482589	62436284	15563749	0	15785204	0	16909784	55005752	19609232	88578816	0	0	38726748	0	50692996	123907016	68578112	124723224	27242420	127051072	24795002	0	16268631	9995145	5251699	46366792	25114110	15769305	6069790	29291480	2223362	14827455	9804483	43815636	815158	16730361	4260584	48387040	7338012	575221	367035	18652450	6882616	266289040	16904322	119767840
Q16695	Histone H3.1t (H3/t) (H3t) (H3/g) (Histone H3.4)	H31T	K[+42]SAPATGGVK[+14]	181851120	390289632	222770544	453606176	42191344	317396608	0	100097	140797984	467697280	12429584	241192960	0	572773760	772056960	352918176	685064192	444393696	232693408	0	0	0	77502520	118338712	68293408	446110624	105390872	149530432	74491296	322325536	35393872	166499760	183344416	230973552	41906504	164778160	56838752	232417760	89672392	135150400	71960384	228403248	72073128	2997378048	338010048	1309046912
Q16695	Histone H3.1t (H3/t) (H3t) (H3/g) (Histone H3.4)	H31T	K[+14]SAPATGGVK[+28]	870891200	906146304	1034744512	1096857856	981598464	992161152	1270155776	1139134080	1286739200	4147999488	1843854336	1591027840	3587583232	3797570048	1810995840	2932942592	4806260224	3260764160	1288633984	2806834176	1605485568	2133197440	150104128	397719584	519176192	2161470976	1294479616	894647488	529847008	2213863424	92193752	507560160	934978944	605456640	111273968	571690432	323288896	2218268672	114864992	451225184	360937088	321517216	509933888	14584279040	1310958592	6327246848
Q16695	Histone H3.1t (H3/t) (H3t) (H3/g) (Histone H3.4)	H31T	K[+14]SAPATGGVK[+14]	2298650368	4855815680	0	49768	0	39603	0	6490071040	3704126464	8701023232	0	0	7529805312	16429221888	52509	11412555776	12468908032	13132226560	7193037824	14513525760	0	105796	3087553280	2542663680	1484776576	3378660864	2903006720	3026352640	1509015424	3301628160	1204877312	3111782656	1961947904	3202819072	1474392448	3315737088	1099794688	3543958528	2059600512	2875054336	867758272	1712493056	1209791616	30508152832	3252126976	11901887488
Q16695	Histone H3.1t (H3/t) (H3t) (H3/g) (Histone H3.4)	H31T	SAPATGGVK[+28]	595490	654589	600653	3809101	508722	855964	86577	2620497	629695	1171261	764739	631916	95055304	2093947	62966	880851840	147815	1736396	0	651503808	97905	860253	33116794	531643808	2429652	255638896	18986962	590246592	4108351	13716918	31319444	602064448	27203886	274207392	19200430	738057472	7223472	13756543	24431514	612211904	37809084	12895968	72633312	1281091840	17592544	22280004
Q16695	Histone H3.1t (H3/t) (H3t) (H3/g) (Histone H3.4)	H31T	SAPATGGVK[+14]	671608	0	2921985	298760	3126955	16532687	3735740	26034620	1998611	9944084	3020041	5049845	578950	8380878	9128476	16536355	214984	19993510	74023	31492556	121330	4076319	13530657	1329286656	18003052	48016248	10781170	1347018112	10273566	38150096	314268	1357883392	14796499	22039952	9148408	1679009152	11341654	27487714	7800363	1447514624	87142576	53564500	10964929	2236758784	65124920	72440592
Q16695	Histone H3.1t (H3/t) (H3t) (H3/g) (Histone H3.4)	H31T	K[+28]SAPATGGVKKPHR	0	92879	0	380912	217444	620920	0	199523	0	34165	0	0	0	0	795013	29382110	4573166	5415611	0	605517	366193	0	3551557	330531	0	198748	764776	185210	187613	0	1447026	114684	0	0	2185684	218178	9644	0	2512857	247256	0	0	60830	16661155	21042	155697
Q16695	Histone H3.1t (H3/t) (H3t) (H3/g) (Histone H3.4)	H31T	K[+28]SAPATGGVKKPHR	0	0	0	0	0	0	0	0	0	0	0	0	0	0	2120595	0	0	0	0	792549	2471435	0	0	1413360	0	0	0	1030784	0	0	0	0	202216	0	0	1151471	0	0	0	1043857	77022	144479	144626	39584604	54383	0
Q16695	Histone H3.1t (H3/t) (H3t) (H3/g) (Histone H3.4)	H31T	K[+28]SAPATGGVKKPHR	1011528	239575	1840988	963754	2737311	2579802	3260213	1200184	2220963	35190	1181602	5101039	0	652107	1698065	54735100	2388132	4570679	0	5033496	2364980	0	6778090	1334160	257322	663572	5287557	795172	2366166	177011	2066245	366178	99408	225626	5844995	760718	39453	92121	4675048	941328	110261	111922	75122	25246956	81008	1358944
Q16695	Histone H3.1t (H3/t) (H3t) (H3/g) (Histone H3.4)	H31T	KSAPATGGVK[+28]KPHR	48837	1763153	0	52632	558597	7352201	12876510	671246	13573442	6242722	58612	11764948	2422244	54045880	1452479	54679412	11460172	5889640	6933489	2660809	2855926	192650	19511554	1545433	962553	423613	5741062	1263780	485562	311563	6992266	1470619	509032	207066	993364	1313204	1963968	681307	6658137	1069326	242299	1273497	4873274	36418712	609006	126159
Q16695	Histone H3.1t (H3/t) (H3t) (H3/g) (Histone H3.4)	H31T	KSAPATGGVK[+42]KPHR	0	0	0	0	0	19406	883879	0	0	0	0	1685642	251779	0	0	0	0	0	0	0	1162709	0	24415	1088511	31101	15856	10136	759733	277781	0	0	610104	64338	85288	161249	557707	325310	30757	2124413	760017	51399	89493	23863	91000768	210147	0
Q16695	Histone H3.1t (H3/t) (H3t) (H3/g) (Histone H3.4)	H31T	KSAPATGGVK[+42]KPHR	0	0	0	0	0	0	0	0	0	0	0	0	1249014	0	0	0	0	0	0	0	7251707	0	0	4368814	301978	0	0	4257660	0	62875	0	3181959	0	320532	0	2804232	0	70233	0	3219168	267516	924558	158811	149157040	345423	0
Q16695	Histone H3.1t (H3/t) (H3t) (H3/g) (Histone H3.4)	H31T	KSAPATGGVKK[+42]PHR	0	0	405763	0	732740	0	131283	0	1691993	0	0	265836	0	0	261408	0	3280658	0	0	0	1128396	253251	5882	463521	361249	15890	26296	771714	729809	15056	0	629074	63930	93063	279639	558421	326921	5084	1064499	688829	723593	7607	0	88792288	0	0
Q16695	Histone H3.1t (H3/t) (H3t) (H3/g) (Histone H3.4)	H31T	K[+28]SAPATGGVK[+28]KPHR	0	0	0	0	0	0	0	40333	2919675	1565089	2606174	2558601	0	0	0	203349	0	432336	0	1001112	687656	0	799700	2853809	195495	14373	595158	2420631	702491	349068	702780	1614694	667442	202241	472943	1658812	737365	280775	387983	2155601	691592	0	1514683	137803968	10533730	99284
Q16695	Histone H3.1t (H3/t) (H3t) (H3/g) (Histone H3.4)	H31T	K[+28]SAPATGGVK[+28]KPHR	0	25960	56901	558708	47733	0	766407	950823	0	1958014	0	0	147409	0	1056737	349449	1007390	999675	0	1257905	2624318	40891	3656671	8784334	107983	44610	1893127	7333265	40411	3246158	1412648	7298042	566100	2750048	1742068	5774060	64463	3220246	4731494	4832327	2826268	641279	873479	170372496	389712	5278606
Q16695	Histone H3.1t (H3/t) (H3t) (H3/g) (Histone H3.4)	H31T	K[+14]SAPATGGVK[+28]KPHR	51518	0	0	0	0	0	0	0	0	0	1182682	1667706	3392033	33132738	2597603	0	0	21664304	934308	9497284	865586	282684	17753	1089335	1191333	32160	12399	759733	278815	40733	0	610104	64316	126878	279663	558303	398824	30537	1062299	687349	720065	88389	49	90204280	208258	0
Q16695	Histone H3.1t (H3/t) (H3t) (H3/g) (Histone H3.4)	H31T	K[+14]SAPATGGVK[+28]KPHR	0	0	0	0	0	0	0	0	0	0	853641	0	0	25584860	0	0	0	17518206	0	10378394	0	23534	0	4402764	0	0	0	4257660	0	0	0	3181959	0	387247	0	2816877	0	70129	0	2855858	0	900626	34465	153931328	345176	0
Q16695	Histone H3.1t (H3/t) (H3t) (H3/g) (Histone H3.4)	H31T	K[+14]SAPATGGVK[+42]KPHR	547490	87025	94788	0	121253	2578401	0	0	0	84175	564223	0	145483	350899	0	77029	0	5466292	250850	0	451654	2849411	3266973	8776658	108031	2249554	749654	7333265	250021	341541	1026247	7298042	568228	3093156	1027501	5773577	1880802	2928352	3976672	4999021	2609952	515533	1480278	178448736	6441548	5334820
Q16695	Histone H3.1t (H3/t) (H3t) (H3/g) (Histone H3.4)	H31T	K[+14]SAPATGGVKK[+28]PHR	0	0	2323231	0	1229727	0	0	0	0	1717805	2222479	0	0	25520558	11537199	13872202	3197155	17268138	0	0	6577947	0	0	4395618	293711	0	19383	4257660	167366	62944	0	3181959	213549	347682	0	2809314	0	70162	0	2857656	269655	900798	167868	157461968	346726	0
Q16695	Histone H3.1t (H3/t) (H3t) (H3/g) (Histone H3.4)	H31T	KSAPATGGVK[+28]K[+14]PHR	598495	50066	2336216	0	1226030	0	0	0	1307882	1827068	2193165	0	1249192	25464932	9083226	0	0	113182	0	26351872	6572819	2603489	0	4418231	318778	208588	19232	4257660	167154	63019	0	3181959	518692	346452	0	2794817	7800	70178	0	3026218	273209	920331	187613	151386672	349075	0
Q16695	Histone H3.1t (H3/t) (H3t) (H3/g) (Histone H3.4)	H31T	K[+28]SAPATGGVKK[+14]PHR[+14]	4756104	11864518	9140898	8877563	20890760	8370946	1366217	9763096	2015990	1829449	2616708	1697475	5411906	25466080	8461430	61967528	2725271	4600075	3744408	15516935	2779123	3012387	956913	1710072	1618555	387341	748113	2184668	702092	358869	702933	1554911	672620	202311	2901342	1704094	737237	281030	509886	2170398	0	264047	1526181	139878816	4938811	193361
Q16695	Histone H3.1t (H3/t) (H3t) (H3/g) (Histone H3.4)	H31T	K[+14]SAPATGGVK[+14]K[+28]PHR	316884	11804337	9426707	8991224	2261550	11958893	1363903	9673625	2010336	1424039	2617586	1706072	5374016	25534316	8527028	61918932	2867602	4530641	3701914	4203437	2781057	254038	957969	2866544	1614074	387757	749181	2340828	697332	357946	703579	1565076	661406	200556	327818	1658839	737485	279383	508626	2170247	0	262026	1532329	139830864	594714	191900
Q16695	Histone H3.1t (H3/t) (H3t) (H3/g) (Histone H3.4)	H31T	K[+14]SAPATGGVK[+14]K[+14]PHR	320356	0	386342	0	687743	0	1776186	121671	1680358	2000728	1143413	244177	3401870	33047722	2612941	21513702	3293047	21726028	1294482	6648918	1128383	3803744	12652	463546	1160946	0	3942	771714	197288	15060	0	629074	63766	93299	279820	557911	325466	491258	2124335	687921	722902	0	0	89083768	281304	4653842
Q16695	Histone H3.1t (H3/t) (H3t) (H3/g) (Histone H3.4)	H31T	SAPATGGVK[+28]KPHR	0	0	175517	0	0	0	0	0	0	718317	0	217149	1087861	0	725109	1499751	0	0	242674	2836128	0	133408	303730	4610908	741810	0	251347	4250653	140643	1257529	271051	4116122	615176	1051112	99270	210048	283694	0	0	3375155	1814743	377967	1667606	107311704	10229966	0
Q16695	Histone H3.1t (H3/t) (H3t) (H3/g) (Histone H3.4)	H31T	SAPATGGVK[+28]KPHR	84443	1069071	83310	285644	34778	2215791	0	1233244	0	419535	83024	74360	203678	1273016	183565	0	222356	62444	68050	3365476	0	94527	146644	13446860	561563	16630649	42802	12378849	106390	731246	51615	8406131	524012	1115183	0	93143264	247957	25995690	2787022	10637588	9186229	1511129	1062621	246591280	8828020	3719707
Q16695	Histone H3.1t (H3/t) (H3t) (H3/g) (Histone H3.4)	H31T	SAPATGGVKK[+28]PHR	0	0	0	0	435966	0	0	0	0	0	162287	0	1088043	0	953423	0	0	0	186964	2886043	1906963	397766	331384	4950946	741918	874146	251636	4250653	119224	1241637	271105	4116122	615265	1548286	0	163746	265673	0	0	3825469	269929	377979	1668218	109010536	10233136	0
Q16695	Histone H3.1t (H3/t) (H3t) (H3/g) (Histone H3.4)	H31T	SAPATGGVKK[+28]PHR	77447	27288	289777	579946	405674	1749919	1409294	519021	256781	242480	0	67502	203700	282758	246075	148869	0	27706852	99596	3578844	7671326	133535	148178	14119895	555339	531165	42684	12378849	165027	496583	52957	8406131	522065	1109284	3563569	94209888	199763	26182360	2637140	4700110	23344708	1511062	1062384	244503024	8833836	189981
Q16695	Histone H3.1t (H3/t) (H3t) (H3/g) (Histone H3.4)	H31T	SAPATGGVKK[+14]PHR[+14]	1577564	2873	62490980	1594739	1285650	86031	174486	1667709	88364	3257814	6795089	13058523	0	35220172	16785352	24485482	12643823	27507426	9591331	7462892	0	9722869	142841	12925386	628354	13040536	1507670	12378849	706782	11178772	3822523	8406131	550224	11742816	3508643	346590	3831956	13159585	271112	14005639	9250162	1511487	1062548	242695504	8810482	25636342
Q16695	Histone H3.1t (H3/t) (H3t) (H3/g) (Histone H3.4)	H31T	EIAQDFK[+14]	128859528	0	215809072	0	0	0	130819640	0	138132800	0	232323008	216176736	214807088	1095068800	292567648	0	296862464	0	0	0	0	37170	151135120	223811152	65586984	370672192	115182744	212357232	90802144	294508736	181608640	151651216	50547392	342153312	110881472	315273184	82899944	277065376	174923744	263978992	27281366	280548192	356940672	59375	201860752	306673216
Q16695	Histone H3.1t (H3/t) (H3t) (H3/g) (Histone H3.4)	H31T	EIAQDFK[+28]TDLR	17785790	1087410944	3890663	863931712	919193536	200966	23630396	1108634112	998735424	1061079	1463576064	17656742	8982600	268591	10797181	3734434816	14795316	3479499776	0	2914267392	0	1585781632	66804632	49665780	113822728	108172888	42219076	34009544	140758544	83151264	364923488	19246366	76447152	95733624	367504768	47748988	163000288	77948224	434047520	44028164	29067184	79042976	1245278592	162629	306389440	312712416
Q16695	Histone H3.1t (H3/t) (H3t) (H3/g) (Histone H3.4)	H31T	EIAQDFK[+28]TDLR	281320	108011024	506348	86133832	139073984	0	393368	57410716	135951648	130801	331012992	405829	742562	0	0	887833280	454928	838849664	177373	826561856	455147	484224416	1133108	36828140	36496204	12892964	1990023	30762176	59320480	19568178	1678476	17328584	0	19902396	13295852	33507274	53435440	17794468	8409202	35078708	726714	19747400	83874464	146398	30102296	93162976
Q16695	Histone H3.1t (H3/t) (H3t) (H3/g) (Histone H3.4)	H31T	EIAQDFK[+14]TDLR	101536232	38325848	0	1999690	4947312	3405496	11656322048	5250078	0	29515958	3480986	0	16248921088	2220201	0	15087982592	1072213	13171148800	359694	15506390016	0	61762	3343098624	349783840	1081084288	592533312	2485270528	246957840	1158401792	458893792	2831600640	137708576	818668928	494711840	3079651328	342563264	1080855936	461847104	3117533184	333611008	358846208	528769408	6832487424	61897508	2022540416	1776140032
Q16695	Histone H3.1t (H3/t) (H3t) (H3/g) (Histone H3.4)	H31T	EIAQDFK[+14]TDLR	26167658	7673304	0	1336001	0	904793	1371577728	83257	0	9986118	457519	0	2892307456	0	0	3726294272	0	3195313408	0	4313569280	0	0	29001322	243235696	268822752	118714520	14056977	210625680	420288352	135883024	57878948	122408376	4708996	130323376	69761256	256013840	331425152	147624768	44876252	245853600	44905164	135553552	451835264	26585902	234126736	552269824
Q16695	Histone H3.1t (H3/t) (H3t) (H3/g) (Histone H3.4)	H31T	R[+14]VTIMPKDIQLAR	10281114	1391016	8744319	1174071	52524960	479896	76687456	8651306	0	9451400	15839573	0	0	13735113	0	42075256	6608258	19411956	67557232	14919729	0	15991340	284988768	172901	107260832	157956	294763680	439624	7951205	804867	148858640	795467	459345536	275508	144115568	304981	39456040	2128488	109747752	311767	238875632	555578	123605584	46129376	6628392	340784832
Q16695	Histone H3.1t (H3/t) (H3t) (H3/g) (Histone H3.4)	H31T	R[+14]VTIMPKDIQLAR	1028035	0	980886	41389	0	33846	16165788	1097252	0	3587829	2722050	0	0	3348955	0	0	1735417	6838058	492495	5772789	47160	6945729	0	22134	650990	64703	514960	66239	169237	210221	0	182729	1328670	192178	0	67003	6366124	1371569	0	39979	2271510	120998	0	11404536	267587	84998624
Q02539	Histone H1.1 (Histone H1a)	H11	KKPAGPSVSELIVQAASSSK[+28]	0	198129	0	0	0	5472	0	0	0	0	0	14933741	9990016	3667805	34002100	6145472	0	7471357	0	0	0	0	0	391052	0	0	0	338110	0	0	0	80741	3741127	0	0	88128	0	0	0	188237	2046413	0	26564722	10138339	14026539	1863001
Q02539	Histone H1.1 (Histone H1a)	H11	KKPAGPSVSELIVQAASSSK[+28]	0	0	0	0	0	386311	0	194184	744749	0	0	85541752	45376564	23673882	150781232	84182264	0	106068856	0	0	0	448670	279166	9828784	0	2085612	1115752	9535590	0	1441064	505014	7542880	29297334	1665166	0	4157770	0	783633	1052735	4883858	25434594	885436	185072992	239580784	121041256	24129122
Q02539	Histone H1.1 (Histone H1a)	H11	KKPAGPSVSELIVQAASSSK[+28]	0	0	0	0	0	0	0	0	0	0	0	9504496	4844422	1173827	16591324	13813942	0	12725558	0	0	0	0	10091453	1758667	0	315353	11904943	1655603	0	234042	10997993	1496720	1128054	141734	5837945	759047	330698	222953	15238342	989524	1186539	101113	14674124	19645378	8807906	1536886
Q02539	Histone H1.1 (Histone H1a)	H11	KPAGPSVSELIVQAASSSK[+28]	0	0	1101290752	8773	26214976	0	6450786	0	20210912	0	0	1024770816	2155810304	0	107609	0	3141258240	2517521664	1120563072	1063844800	0	0	251158064	11330012	38557512	24240486	315511456	35864784	34492256	8674821	180444048	6775093	668146816	26299520	310048768	16144876	47039052	33211912	210708960	4589300	431351424	7426631	2236418304	257152768	814140032	557128960
Q02539	Histone H1.1 (Histone H1a)	H11	KPAGPSVSELIVQAASSSK[+28]	0	0	520890528	0	13521062	0	7319548	0	12450364	0	0	457750208	866271424	0	0	0	1169233024	1865925504	437021536	1303435008	0	0	175789440	6231365	93686496	30210624	304871136	25336198	38882448	17352674	203871168	11555621	889854656	39925060	295424768	32962326	94444680	53446360	211294096	18495018	615388608	23189732	1705335168	391533760	523148928	416551552
Q02539	Histone H1.1 (Histone H1a)	H11	KKPAGPSVSELIVQAASSSK[+28]ER	3353132	1824059	1188545	192077	1982002	464262	4867328	793814	0	2094156	0	1109529	1857736	143375	2303062	0	457918	210696	159562	0	0	29788	849817	0	927497	47405	0	129571	373355	128703	301350	407	446573	313839	464607	0	0	753842	692601	0	0	0	1051965	326608	7021846	0
Q02539	Histone H1.1 (Histone H1a)	H11	KKPAGPSVSELIVQAASSSKER[+28]	3390605	387674	0	184527	136306	464951	4827525	794206	294991	2103962	199757	1114220	1841409	171271	2259516	8361341	453668	212590	164410	560771	578856	1226606	850279	0	1357160	47420	311484	129575	133858	128682	301482	47702	446576	65145	463400	0	0	753987	686635	0	0	94625	1035153	333133	7021174	0
Q02539	Histone H1.1 (Histone H1a)	H11	KKPAGPSVSELIVQAASSSK[+14]ER[+14]	3430384	391186	1194907	198181	2016141	454635	4835358	793094	1480102	0	0	1113820	1847158	0	2267573	61746	500235	0	156420	441859	483819	0	846481	0	927638	0	0	129580	368285	128861	302030	799	221818	311705	459370	0	0	338259	666184	0	0	0	1117984	623211	7020620	0
Q02539	Histone H1.1 (Histone H1a)	H11	KPAGPSVSELIVQAASSSK[+28]ER	874739	45202	13469797	168459	10545796	259764	25074286	0	18344152	0	0	59712648	16670849	0	0	0	39266120	280579	0	0	0	0	350792	54882	0	0	0	142822	0	0	0	0	5547937	0	339280	0	0	0	277171	0	2730511	0	41343972	0	21993128	0
Q02539	Histone H1.1 (Histone H1a)	H11	KPAGPSVSELIVQAASSSK[+28]ER	0	25999172	127394504	0	82012184	0	111618416	0	92227192	0	0	937594176	134907856	0	408444	0	339106784	0	2414075	617504	487983	0	40065116	16812868	3148183	5565728	9472593	19379612	4879137	2564088	0	8068986	101032720	4910770	21669384	8444058	1037980	2756299	19890020	3241829	60796884	2391222	270384352	3288246	258919792	14164272
Q02539	Histone H1.1 (Histone H1a)	H11	KPAGPSVSELIVQAASSSK[+28]ER	0	546795	2400972	0	322578	0	617786	0	631375	0	0	24171884	3168196	0	0	0	6808495	0	0	0	0	0	323738	601214	0	50078	0	947332	0	0	196453	357171	1303401	56738	216402	484349	0	52843	235550	73664	0	51502	4338173	69928	4151422	172838
Q02539	Histone H1.1 (Histone H1a)	H11	KPAGPSVSELIVQAASSSKER[+28]	6178470	43840	13471135	175213	10588683	0	0	0	0	0	43768776	381828	51436116	0	70833728	562757	0	6523242	282508	0	6300171	0	350349	54881	0	0	0	142781	0	0	0	0	5534344	0	339218	0	0	0	431728	0	2748213	0	40401728	0	22008116	0
Q02539	Histone H1.1 (Histone H1a)	H11	KPAGPSVSELIVQAASSSKER[+28]	95896168	26035090	127427032	0	81980928	4461254	0	0	0	0	812215232	0	440783488	0	942330944	0	0	226230160	10605033	110483	106380832	0	40073564	16813298	2840183	5575188	9021925	19374200	8264170	2562059	18822274	8080144	101021504	4907083	21680466	8445617	1517269	2755525	25471658	3241655	60925596	2862097	267821760	3292363	256577552	14192941
Q02539	Histone H1.1 (Histone H1a)	H11	KPAGPSVSELIVQAASSSKER[+28]	1470401	552813	2403028	0	316557	109223	0	0	0	93975	20099730	0	7250207	0	23974154	0	0	6892303	0	34391	2246703	0	324434	601237	0	50122	0	947071	0	0	233252	357019	1303067	56746	215954	484458	0	52848	366898	73711	0	51549	4608190	69945	3476202	172768
Q02539	Histone H1.1 (Histone H1a)	H11	KPAGPSVSELIVQAASSSK[+14]ER[+14]	106321	25965716	0	0	149138	0	0	0	0	0	0	5726166	0	282633184	941090624	264062208	4826634	225680944	190564976	198890912	63921880	38351112	39255628	16814854	3646038	5556992	7879483	19374246	3748504	2557369	18855280	8078997	101645744	4901674	21991024	8439992	2050158	2753335	20006752	3241410	60857652	2856654	270877856	3289914	256074624	14186047
Q02539	Histone H1.1 (Histone H1a)	H11	KPAGPSVSELIVQAASSSK[+14]ER[+14]	0	548753	0	0	0	0	0	0	0	0	0	0	0	7592158	23962866	6389366	106872	6836814	4452045	4802406	1188118	927059	320322	601334	0	50112	0	947062	0	0	232106	356977	1302922	56718	216595	484496	0	53019	236820	73828	0	51523	4391410	69942	3470461	172787
Q02539	Histone H1.1 (Histone H1a)	H11	K[+28]ALAAAGYDVEK	1032088	0	38899	1914683	0	0	888815	2725784	3604714	0	42731	720392	0	0	302011	3436247	0	369844	0	4431879	12633208	4972470	5482722	3482388	0	4889575	4759770	4399105	1347513	3918765	5250984	1523687	0	7788763	3998973	8692715	443036	2281750	303395	5247831	1604153	5717960	211231	11114346	3718462	1874999
Q02539	Histone H1.1 (Histone H1a)	H11	K[+14]ALAAAGYDVEK	0	14613	0	1681670	0	0	0	0	0	7548	194671808	200317440	0	0	87579288	0	79338008	109022112	40718284	137038896	0	0	46133096	7503907	5031105	4337488	30360950	7535831	10204935	3387169	53279572	5132489	5314056	4463263	36728716	9606653	397412	4380790	23442034	9217290	1035607	2497494	61309944	1115716	7396339	13777622
Q02539	Histone H1.1 (Histone H1a)	H11	K[+14]ALAAAGYDVEK	0	0	0	1249724	0	39344	0	30946	0	0	21572516	28427996	0	0	6053620	443334	6255252	13064931	3250128	26169696	0	0	2156492	2478740	0	835760	1239057	2192004	737915	907274	1447976	1801276	0	620064	0	3670860	0	890625	0	2763780	283705	580208	4877442	170150	0	3826771
Q9H1B7	Probable E3 ubiquitin-protein ligase IRF2BPL (EC 2.3.2.27) (Enhanced at puberty protein 1) (Interferon regulatory factor 2-binding protein-like)	I2BPL	R[+14]NSSSPVSPASVPGQR	154090624	13313256	822697	2796742	2521523	1431681	1619102	0	1738963	2389485	2543389	2215861	236725	24037036	128726	597952	2938071	5952499	1064859	1394399	539067	1335244	1156913	308128	682329	181084	382426	140079	337398	351809	185112	292187	163127	98062	440819	241664	153234	614779	919947	371179	0	265123	121411	1912652	2074025	4638609
Q3SYA9	Putative POM121-like protein 1	P12L1	TRPGTSAPAAAAAAPPPSTLNR[+28]	2002738	0	972467	9725113	0	11730458	1700398	20170516	0	20855478	0	0	1251593	100316960	14919	0	0	0	0	60550448	0	0	13696286	219238	0	3657463	9654420	656254	0	4245766	13087837	178601	1333952	3959970	8570414	571614	0	4203304	12256482	383948	0	1514224	42459440	318329	1449962	28060958
Q3SYA9	Putative POM121-like protein 1	P12L1	TRPGTSAPAAAAAAPPPSTLNR[+28]	8506783	0	2395960	48734788	0	52951980	3119732	61991152	0	72254184	0	0	8364406	221135824	245931	0	0	0	0	152516736	0	119587	18536058	8238023	0	16726001	17631582	8888239	0	18392950	18162240	5147134	803126	15863470	16092120	10683880	0	18726396	21274302	9414588	0	7945263	66559340	7180058	8313284	70077632
Q3SYA9	Putative POM121-like protein 1	P12L1	TR[+28]PGTSAPAAAAAAPPPSTLNR[+28]	0	692151	4970813	0	1978012	823109	0	0	0	1884095	1344463	0	0	8111062	1147359	0	1783708	0	522009	4996388	519858	0	1384952	0	135528	201580	1716063	0	0	0	1573925	0	0	150613	1896134	0	0	0	0	0	0	0	5285410	0	853390	783065
Q3SYA9	Putative POM121-like protein 1	P12L1	TR[+28]PGTSAPAAAAAAPPPSTLNR[+28]	0	7507396	14754781	0	6353716	8102719	0	426433	0	14844199	8938363	0	0	38671612	7892979	0	5901132	0	5014703	24608378	2355786	0	4803568	0	839332	724989	3524698	952547	0	378236	2383565	0	0	1503449	3112750	756483	1559525	1383505	0	273288	0	0	14590874	0	2151467	9813031
P84243	Histone H3.3	H33	K[+28]SAPSTGGVK	561485248	70191800	330885408	1452032	1336893	1283244	92027	1897073	374128384	148776720	165945024	181045	591918	150587	118576288	0	65538	0	211513536	127718	0	106602	65708104	78051848	26763568	97364928	74457536	91811920	39018280	77567312	35366056	89161712	39074060	53308872	25663246	103564624	25209844	56805616	29927628	84623144	71761720	51458612	41896068	916685952	101055976	409905664
P84243	Histone H3.3	H33	K[+42]SAPSTGGVK	14309162	561986	19234642	912286	12412097	1586681	5239180	764774	204991	667570	4340844	68419	110424	112582944	503493	83192048	4137937	19375888	92299	241465216	230829	2152170	63016056	38488268	13524578	91865040	104010456	48252944	17401460	98934400	75911216	49065112	50904528	106948488	81523456	52425004	8726970	111540816	54616688	40862108	23132444	37481988	23118652	833792000	60766396	343946592
P84243	Histone H3.3	H33	K[+28]SAPSTGGVK[+28]	0	5444008	25181602	9777957	366949	109220680	104470784	48344708	0	13187533	129955	99088	96460480	88970928	1385122	60671844	88813040	54314360	416306	91161080	14573373	270218272	23479924	9885262	13711734	39508140	13392586	10259117	10458838	36717332	15826770	13665400	21551830	4787042	16992668	11266028	4375247	25478580	22219828	13266002	10827581	18581508	9265532	312302816	32159978	131715872
P84243	Histone H3.3	H33	K[+28]SAPSTGGVK[+14]	35763	232	19243772	71100104	73865	5943015	79108968	75246056	4949165	205120432	4593959	57314	1242173	524880064	4309872	5439810	341800	19501154	87821032	16740291	0	760052	62662252	38284192	59630580	96374976	103889488	46131852	17585854	102085760	73977776	47920384	48891368	106187968	81997032	54274720	41446296	110572520	55879236	41068824	23368816	35408708	23381364	824811328	61191476	344561920
P84243	Histone H3.3	H33	K[+42]SAPSTGGVK[+14]	233224	570059	25284910	35824832	17536770	57605	104104768	398675	26356586	64983792	9396890	26046496	4418763	89041144	4610930	60639864	4653534	54285040	17200746	90032008	42725416	3600887	23338734	9889532	13453929	39217248	13227311	10285130	10331962	36893068	15982583	13896038	21644828	4830705	16972998	11274610	4250877	24755370	22365380	13341494	11102156	18580540	9251562	314950112	31950174	133060568
P84243	Histone H3.3	H33	K[+14]SAPSTGGVK[+14]	561602688	0	330304192	1600790	443229440	0	210079616	85891360	374278336	75249	166375424	0	164759088	361056416	0	232874560	142070736	294043424	145691	366413696	262407040	73531	65744984	76714648	26123174	98384296	74749320	91589976	38386192	79149784	35466748	89374448	38488080	46444272	25778158	103917792	25376694	55891712	13474921	85032232	71086352	51310748	23711074	918928768	97741728	407896992
P84243	Histone H3.3	H33	SAPSTGGVK[+14]	0	1861617	120165	1750786	148789872	1320667	167568800	2039830	100820632	466224	1104522	768247	262831392	1877158	110754368	81735	94749336	606945792	42853936	0	0	320670496	144589632	62172940	886432256	258190000	142098624	65527624	160291376	200042592	119405592	39639192	99084376	240149664	163355328	77973848	1270424064	153005296	229936944	62330344	50103820	210482528	1193133056	146267680	364596736	182321264
P84243	Histone H3.3	H33	EIAQDFK[+14]	128859528	0	215809072	0	0	0	130819640	0	138132800	0	232323008	216176736	214807088	1095068800	292567648	0	296862464	0	0	0	0	37170	151135120	223811152	65586984	370672192	115182744	212357232	90802144	294508736	181608640	151651216	50547392	342153312	110881472	315273184	82899944	277065376	174923744	263978992	27281366	280548192	356940672	59375	201860752	306673216
P84243	Histone H3.3	H33	LVR[+14]EIAQDFKTDLR	253979	460366	1923765	553350	146598	310974	2654441	430581	370424	237991	3288258	161939	1217675	404813	288502	4156607	638854	20545	1642169	123562	340604	24898	4524081	206155	389930	1121175	2075422	465138	1709986	162590	1762312	215846	166126	1286541	1461129	185523	667964	243520	2664495	25415	1300207	1503641	216100	1361085	1472167	407043
P84243	Histone H3.3	H33	LVR[+28]EIAQDFKTDLR	0	6843342	0	5884854	0	0	4117164	11944922	0	353136	10825360	0	275363	0	1174603	1644777	0	0	0	2377323	0	0	564859	93653	1350960	0	8987483	458330	0	0	1340213	498987	9009749	33070	0	0	0	824456	1738755	129511	2859268	76593	0	57626172	732418	43485724
P84243	Histone H3.3	H33	LVREIAQDFK[+14]TDLR	407532	0	0	0	0	0	0	0	0	0	130019	0	0	160777	0	0	683254	0	35209884	0	0	0	92026968	76574096	0	36469704	68274760	0	448080	42179636	76362600	0	28728432	42320168	48771336	140747872	19498338	56919160	87873160	144472368	11945481	30185492	214247680	2098587	65639092	286752288
P84243	Histone H3.3	H33	LVREIAQDFK[+14]TDLR	4981278	262621	1925248	335613	1929361	192819	798955	565108	1007348	84929	313308	249238	1223210	185004	0	238689	1517168	0	668829	0	0	55119	0	104126	256286	1365021	726254	465066	84454	934073	0	215891	0	1382201	1158254	62297	0	504714	0	117061	395804	780634	852614	3231084	181665	1749422
P84243	Histone H3.3	H33	EIAQDFK[+28]TDLR	17785790	1087410944	3890663	863931712	919193536	200966	23630396	1108634112	998735424	1061079	1463576064	17656742	8982600	268591	10797181	3734434816	14795316	3479499776	0	2914267392	0	1585781632	66804632	49665780	113822728	108172888	42219076	34009544	140758544	83151264	364923488	19246366	76447152	95733624	367504768	47748988	163000288	77948224	434047520	44028164	29067184	79042976	1245278592	162629	306389440	312712416
P84243	Histone H3.3	H33	EIAQDFK[+28]TDLR	281320	108011024	506348	86133832	139073984	0	393368	57410716	135951648	130801	331012992	405829	742562	0	0	887833280	454928	838849664	177373	826561856	455147	484224416	1133108	36828140	36496204	12892964	1990023	30762176	59320480	19568178	1678476	17328584	0	19902396	13295852	33507274	53435440	17794468	8409202	35078708	726714	19747400	83874464	146398	30102296	93162976
P84243	Histone H3.3	H33	EIAQDFK[+14]TDLR	101536232	38325848	0	1999690	4947312	3405496	11656322048	5250078	0	29515958	3480986	0	16248921088	2220201	0	15087982592	1072213	13171148800	359694	15506390016	0	61762	3343098624	349783840	1081084288	592533312	2485270528	246957840	1158401792	458893792	2831600640	137708576	818668928	494711840	3079651328	342563264	1080855936	461847104	3117533184	333611008	358846208	528769408	6832487424	61897508	2022540416	1776140032
P84243	Histone H3.3	H33	EIAQDFK[+14]TDLR	26167658	7673304	0	1336001	0	904793	1371577728	83257	0	9986118	457519	0	2892307456	0	0	3726294272	0	3195313408	0	4313569280	0	0	29001322	243235696	268822752	118714520	14056977	210625680	420288352	135883024	57878948	122408376	4708996	130323376	69761256	256013840	331425152	147624768	44876252	245853600	44905164	135553552	451835264	26585902	234126736	552269824
P84243	Histone H3.3	H33	R[+14]VTIMPKDIQLAR	10281114	1391016	8744319	1174071	52524960	479896	76687456	8651306	0	9451400	15839573	0	0	13735113	0	42075256	6608258	19411956	67557232	14919729	0	15991340	284988768	172901	107260832	157956	294763680	439624	7951205	804867	148858640	795467	459345536	275508	144115568	304981	39456040	2128488	109747752	311767	238875632	555578	123605584	46129376	6628392	340784832
P84243	Histone H3.3	H33	R[+14]VTIMPKDIQLAR	1028035	0	980886	41389	0	33846	16165788	1097252	0	3587829	2722050	0	0	3348955	0	0	1735417	6838058	492495	5772789	47160	6945729	0	22134	650990	64703	514960	66239	169237	210221	0	182729	1328670	192178	0	67003	6366124	1371569	0	39979	2271510	120998	0	11404536	267587	84998624
P42167	Lamina-associated polypeptide 2, isoforms beta/gamma (Thymopoietin, isoforms beta/gamma) (TP beta/gamma) (Thymopoietin-related peptide isoforms beta/gamma) (TPRP isoforms beta/gamma) [Cleaved into: Thymopoietin (TP) (Splenin); Thymopentin (TP5)]	LAP2B	EPTPVLGSGAAAAGR[+28]	38329428	27585014	67769912	15036488	14300415	15791669	9678598	19167674	30641310	57460836	23175176	272884672	170167536	481964736	0	370010272	106905840	372558560	13595907	286131968	152150720	141390656	18409414	3113507	18828410	3045984	44951632	1656786	21544890	3148999	25605010	1726345	55442392	0	23295582	1464042	24537182	4104267	18058500	2134759	36696648	1979578	109711816	15979336	134767344	49086880
P42167	Lamina-associated polypeptide 2, isoforms beta/gamma (Thymopoietin, isoforms beta/gamma) (TP beta/gamma) (Thymopoietin-related peptide isoforms beta/gamma) (TPRP isoforms beta/gamma) [Cleaved into: Thymopoietin (TP) (Splenin); Thymopentin (TP5)]	LAP2B	TDK[+28]PR[+14]QEDK[+42]DDLDVTELTNEDLLDQLVK	9146219	215538	18446688	0	0	0	2185383	391530	883753	2644070	14164359	0	11106242	11002531	20475662	0	14292999	4312014	2285959	156880	1325816	940155	0	608734	0	0	286610	695483	0	0	765200	269089	8683	0	0	451640	0	0	2002031	0	0	0	16090457	312485	0	0
P42167	Lamina-associated polypeptide 2, isoforms beta/gamma (Thymopoietin, isoforms beta/gamma) (TP beta/gamma) (Thymopoietin-related peptide isoforms beta/gamma) (TPRP isoforms beta/gamma) [Cleaved into: Thymopoietin (TP) (Splenin); Thymopentin (TP5)]	LAP2B	TDK[+42]PR[+14]QEDK[+28]DDLDVTELTNEDLLDQLVK	385536	336124	0	0	4954137	706240	292139	0	0	0	5372806	0	5646204	5087725	14317281	0	6490567	0	997498	5390225	0	0
P42167	Lamina-associated polypeptide 2, isoforms beta/gamma (Thymopoietin, isoforms beta/gamma) (TP beta/gamma) (Thymopoietin-related peptide isoforms beta/gamma) (TPRP isoforms beta/gamma) [Cleaved into: Thymopoietin (TP) (Splenin); Thymopentin (TP5)]	LAP2B	SSTPLPTISSSAENTR[+28]	472143	150264	1152700	0	478306	0	1463360	620623	3062700	1105642	0	2807900	429780	19997898	1395907	15193640	372289	12198503	917715	0	1025738	2842722	0	413646	0	0	881122	99898	0	329290	1341189	71908	0	0	151307	313109	0	0	730546	295863	428649	0	472256	1792539	1300247	1290667
Q16777	Histone H2A type 2-C (H2A-clustered histone 20) (Histone H2A-GL101) (Histone H2A/q)	H2A2C	VTIAQGGVLPNIQAVLLPK[+14]K	0	0	0	0	33971308	0	0	0	0	26336310	0	138651376	105156152	29417044	29862926	0	159629520	0	0	0	41353112	0	7362853	2760158	7511480	2331029	662371	13491653	11732688	0	6618845	6047942	27572518	936490	4186756	8925174	12656608	0	6751260	1193198	15257412	1013427	30908248	91772872	12045954	1275294
Q16777	Histone H2A type 2-C (H2A-clustered histone 20) (Histone H2A-GL101) (Histone H2A/q)	H2A2C	VTIAQGGVLPNIQAVLLPK[+14]K	0	0	0	0	18420340	0	0	0	0	35866000	0	108430048	58861336	13843239	16850344	37777	62829832	0	0	0	11532405	0	6622705	1882042	10000177	0	0	8256219	15146871	0	7960776	5496246	27929802	969838	6901507	6650418	14469744	0	7447556	1940675	13587196	3631118	25220564	196124208	9184988	0
Q16777	Histone H2A type 2-C (H2A-clustered histone 20) (Histone H2A-GL101) (Histone H2A/q)	H2A2C	VTIAQGGVLPNIQAVLLPKK[+28]	391619	576791	2879547	0	2149163	67950	3363778	792097	2019146	5812894	1844214	5906470	0	1942107	1924266	8213402	11609917	3516274	0	16980018	0	524260		951659	2843401		0	469226	4312213		1771734	0	0	741672	551663	0	8313831	0	3065171	0	0	0	344569	0	720861	591488
Q16777	Histone H2A type 2-C (H2A-clustered histone 20) (Histone H2A-GL101) (Histone H2A/q)	H2A2C	VTIAQGGVLPNIQAVLLPKK[+14]	0	8113829	9740037	0	0	2102874	0	0	0	26186822	0	0	105156152	0	27726598	0	0	10899217	0	76890184	0	0	7363518	2732726	7511867	2331029	662437	13447692	11732688	0	5421855	6048222	27562720	938464	4308528	8923609	12656608	0	6751260	1192727	15257412	1023476	27815424	86686168	12049950	1275294
Q16777	Histone H2A type 2-C (H2A-clustered histone 20) (Histone H2A-GL101) (Histone H2A/q)	H2A2C	VTIAQGGVLPNIQAVLLPKK[+14]	0	7654371	5094854	0	0	1456778	0	0	0	35416452	0	0	58861336	0	15720377	37463	0	6649838	0	48620212	0	0	6623263	1881882	10000751	0	0	8229317	15146871	0	6687347	5473849	27923184	971882	7240283	6647184	14469744	0	7447556	1840152	13587196	3635417	22526130	203208784	9441976	0
P20774	Mimecan (Osteoglycin) (Osteoinductive factor) (OIF)	MIME	LSLLEELSLAENQLLK[+14]	48906	14789268	35446368	70869	41693464	0	25902432	0	7857392	22620922	0	0	4981764	678668	0	118930000	7546903	22636228	1455191	9169070	0	0	0	1910872	217368	199944		2546265	0	169553	499337	4036771	0	123631	0	1304653	197107	1485	0	428860	0	522919	3012735	4913005	0	0
Q9Y5S2	Serine/threonine-protein kinase MRCK beta (EC 2.7.11.1) (CDC42-binding protein kinase beta) (CDC42BP-beta) (DMPK-like beta) (Myotonic dystrophy kinase-related CDC42-binding kinase beta) (MRCK beta) (Myotonic dystrophy protein kinase-like beta)	MRCKB	NR[+14]ELLEEMEILK[+14]	924712	0	808181	0	3377684	704055	747951	549992	4682216	1269348	297518	0	0	2218095	161934	3967079	0	2200338	567705	2519522	0	1052340	12269192	3358322	789672	0	5623487	2452579	802123	0	16679118	509894	2718269	0	6256521	1554128	0	14453	1834308	1648632	0	0	1907331	0	406789	774961
P04792	Heat shock protein beta-1 (HspB1) (28 kDa heat shock protein) (Estrogen-regulated 24 kDa protein) (Heat shock 27 kDa protein) (HSP 27) (Stress-responsive protein 27) (SRP27)	HSPB1	VSLDVNHFAPDELTVK[+14]	0	7885083	0	0	0	746937	19593012	3781883	14905688	0	0	23476412	0	0	0	0	192104	0	0	0	0	0	869404	58263	0	5103687	4386512	193619	0	51582	47856	4181346	2661560	730240	1065306	42451	652218	4235462	4872330	81009	468322	1123840	22856734	56943840	10857850	20578168
P04792	Heat shock protein beta-1 (HspB1) (28 kDa heat shock protein) (Estrogen-regulated 24 kDa protein) (Heat shock 27 kDa protein) (HSP 27) (Stress-responsive protein 27) (SRP27)	HSPB1	VSLDVNHFAPDELTVK[+14]	0	83401	0	38759	0	0	9983431	0	9524541	0	96832	25491222	0	0	0	0	0	0	0	0	0	0	0	332773	0	0	0	567894	0	93826	0	0	0	0	696313	391300	0	0	0	688827	374068	0	23551320	0	11607018	0
O14979	Heterogeneous nuclear ribonucleoprotein D-like (hnRNP D-like) (hnRNP DL) (AU-rich element RNA-binding factor) (JKT41-binding protein) (Protein laAUF1)	HNRDL	MFIGGLSWDTSK[+14]	24144	53454	437751	0	0	33856	0	235478	141505	168909	701334	256101	111865	147567	1223251	3550044	0	671532	69801	4840545	309282	35867	415829	42406	0	38958	0	97046	371122	0	0	0	268675	46604	514658	19002	0	147596	177116	211480	0	0	715237	1497262	236309	113306
Q14653	Interferon regulatory factor 3 (IRF-3)	IRF3	QVFQQTISCPEGLR	0	74399216	0	41102920	66470088	48465792	37983124	21575646	49904008	90666392	0	0	86139208	93987264	0	22577336	0	62175296	6152535	22294932	15899728	45102584	38972772	4473490	1425766	1022983	21408112	3170276	3937961	0	32417800	1470869	0	0	11574080	6473680	1535254	0	0	4422600	0	1632532	142670480	0	2444284	0
P42166	Lamina-associated polypeptide 2, isoform alpha (Thymopoietin isoform alpha) (TP alpha) (Thymopoietin-related peptide isoform alpha) (TPRP isoform alpha) [Cleaved into: Thymopoietin (TP) (Splenin); Thymopentin (TP5)]	LAP2A	EPTPVLGSGAAAAGR[+28]	38329428	27585014	67769912	15036488	14300415	15791669	9678598	19167674	30641310	57460836	23175176	272884672	170167536	481964736	0	370010272	106905840	372558560	13595907	286131968	152150720	141390656	18409414	3113507	18828410	3045984	44951632	1656786	21544890	3148999	25605010	1726345	55442392	0	23295582	1464042	24537182	4104267	18058500	2134759	36696648	1979578	109711816	15979336	134767344	49086880
P42166	Lamina-associated polypeptide 2, isoform alpha (Thymopoietin isoform alpha) (TP alpha) (Thymopoietin-related peptide isoform alpha) (TPRP isoform alpha) [Cleaved into: Thymopoietin (TP) (Splenin); Thymopentin (TP5)]	LAP2A	TDK[+28]PR[+14]QEDK[+42]DDLDVTELTNEDLLDQLVK	9146219	215538	18446688	0	0	0	2185383	391530	883753	2644070	14164359	0	11106242	11002531	20475662	0	14292999	4312014	2285959	156880	1325816	940155	0	608734	0	0	286610	695483	0	0	765200	269089	8683	0	0	451640	0	0	2002031	0	0	0	16090457	312485	0	0
P42166	Lamina-associated polypeptide 2, isoform alpha (Thymopoietin isoform alpha) (TP alpha) (Thymopoietin-related peptide isoform alpha) (TPRP isoform alpha) [Cleaved into: Thymopoietin (TP) (Splenin); Thymopentin (TP5)]	LAP2A	TDK[+42]PR[+14]QEDK[+28]DDLDVTELTNEDLLDQLVK	385536	336124	0	0	4954137	706240	292139	0	0	0	5372806	0	5646204	5087725	14317281	0	6490567	0	997498	5390225	0	0
P42166	Lamina-associated polypeptide 2, isoform alpha (Thymopoietin isoform alpha) (TP alpha) (Thymopoietin-related peptide isoform alpha) (TPRP isoform alpha) [Cleaved into: Thymopoietin (TP) (Splenin); Thymopentin (TP5)]	LAP2A	SSTPLPTISSSAENTR[+28]	472143	150264	1152700	0	478306	0	1463360	620623	3062700	1105642	0	2807900	429780	19997898	1395907	15193640	372289	12198503	917715	0	1025738	2842722	0	413646	0	0	881122	99898	0	329290	1341189	71908	0	0	151307	313109	0	0	730546	295863	428649	0	472256	1792539	1300247	1290667
Q71DI3	Histone H3.2 (H3-clustered histone 13) (H3-clustered histone 14) (H3-clustered histone 15) (Histone H3/m) (Histone H3/o)	H32	K[+28]SAPATGGVK	10133	71874	510482	82314	69237	44970	99174	175179	300603	6093173	6412356096	68989	80760	716625	473351	145450	55090	166231	14619254	15757261	12076858	61259	2621134336	2533972480	1513927296	3391065088	2941268480	3039100160	1497966208	3283012608	1205428864	3114025728	1954453376	3195758848	1528529664	3508311808	1105079040	3528718848	2025090432	2862226688	878772288	1729545344	1200224640	30517514240	3248472832	11929141248
Q71DI3	Histone H3.2 (H3-clustered histone 13) (H3-clustered histone 14) (H3-clustered histone 15) (Histone H3/m) (Histone H3/o)	H32	K[+42]SAPATGGVK	1647922	417324	11267538	35259192	8023924	35045140	10869724	43743352	13236760	42248780	926697600	73873	12049047	3820984320	4309412	2511250	13394494	10887096	1277187968	2131316	189715	2134777088	148392864	733681472	515716800	2154445056	1279306496	897748672	536384192	2228788736	92831040	978882432	924724032	1690999680	112889720	1032033920	252304960	2222041344	116442712	855703488	364367776	871576384	509357664	14520635392	1299011712	6254875648
Q71DI3	Histone H3.2 (H3-clustered histone 13) (H3-clustered histone 14) (H3-clustered histone 15) (Histone H3/m) (Histone H3/o)	H32	K[+14]SAPATGGVK	5384625	1393738	507527872	918009	5841230	2335605	19210184	13504294	5271951	4469918	943794688	0	288924	15442711	4008733	16712804	33655	3969740	2415841	6319852	15291	7136399	381198336	685313984	297954880	849076288	413771904	805475008	280944384	883964672	194277296	856137856	388643104	796491840	210538288	980474368	227350144	879215296	258538816	756169280	199456624	463086976	211770144	8385864192	469746304	2889005056
Q71DI3	Histone H3.2 (H3-clustered histone 13) (H3-clustered histone 14) (H3-clustered histone 15) (Histone H3/m) (Histone H3/o)	H32	KSAPATGGVK[+28]	43034	74641	5139580	140080	4368699	90434	260517	21404	3699551488	114974	50510	4872136704	0	0	0	0	12455228416	0	0	349530	92468	269132	2621134336	2533972480	1513927296	3391065088	2941268480	3039100160	1497966208	3283012608	1205428864	3114025728	1285548288	3195758848	810576192	3508311808	1105079040	3528718848	2025090432	2862226688	878772288	1729545344	1200224640	26929014784	3248472832	11929141248
Q71DI3	Histone H3.2 (H3-clustered histone 13) (H3-clustered histone 14) (H3-clustered histone 15) (Histone H3/m) (Histone H3/o)	H32	KSAPATGGVK[+28]	35340	889101	57464	1889258	61069	1627340	650953	303488	8945900	1706996	370205	13789041	780942	1558097	145269	638755	15066493	552238	168083	273627	631953	2489136	3420683	20335830	15990575	22809418	4376355	23304210	18707570	23183642	2227867	22753306	5912027	20627484	1158610	28674602	12805577	24546622	5419634	21498920	7493592	13547542	5495554	11941135	18151252	28953196
Q71DI3	Histone H3.2 (H3-clustered histone 13) (H3-clustered histone 14) (H3-clustered histone 15) (Histone H3/m) (Histone H3/o)	H32	KSAPATGGVK[+14]	5388532	142183	8053530	144425	74984	123673	2198210	44069	2115684	194293584	85911	380875	747397376	5487614	716659392	74421	387779	14111675	5915290	6319852	369040	445096	381198336	685313984	241518880	849076288	413771904	767068672	280944384	883964672	194277296	568901440	388643104	796491840	210538288	980474368	227350144	879215296	258538816	153600208	199456624	463086976	169791408	6679679488	469746304	2165072896
Q71DI3	Histone H3.2 (H3-clustered histone 13) (H3-clustered histone 14) (H3-clustered histone 15) (Histone H3/m) (Histone H3/o)	H32	KSAPATGGVK[+14]	0	26308	0	633892	0	0	1536716	786541	0	40105	0	72262	1918274	0	1779671	0	325332	36559	5098328	0	131112	132416	972790	4454559	540888	4354525	470133	2907570	2481047	4730209	402314	2750025	1862978	4543572	561501	6134348	2266738	4959629	351826	2602368	895842	2428489	909746	33450270	3013330	8264573
Q71DI3	Histone H3.2 (H3-clustered histone 13) (H3-clustered histone 14) (H3-clustered histone 15) (Histone H3/m) (Histone H3/o)	H32	K[+28]SAPATGGVK[+28]	181672080	581701	20297586	1126779	42534640	122376	1521955	641343	76603872	1492310	158677648	335009	643245440	3257330	5797521	3843682	675846336	933435	491769	517575840	417857952	356951	78828752	117866096	67185664	432578688	107987056	152337344	73798896	320580864	36611568	163557520	184474368	234277808	40875188	164486384	56746256	231811232	90744856	135107664	71811288	229994640	70930000	3055262208	335519552	1301403648
Q71DI3	Histone H3.2 (H3-clustered histone 13) (H3-clustered histone 14) (H3-clustered histone 15) (Histone H3/m) (Histone H3/o)	H32	K[+28]SAPATGGVK[+14]	4995649	129277	30699	112557	295288	141939	1269159296	605558	1287640704	4144854528	932628672	786517376	64438	157306	57623	2937067008	345573	27132	8963371	4006365952	31446	75639	148392864	733681472	515716800	2154445056	1279306496	897748672	536384192	2228788736	92831040	978882432	924724032	1690999680	112889720	1032033920	252304960	2222041344	116442712	855703488	364367776	871576384	509357664	14520635392	1299011712	6254875648
Q71DI3	Histone H3.2 (H3-clustered histone 13) (H3-clustered histone 14) (H3-clustered histone 15) (Histone H3/m) (Histone H3/o)	H32	K[+42]SAPATGGVK[+28]	13482589	62436284	15563749	0	15785204	0	16909784	55005752	19609232	88578816	0	0	38726748	0	50692996	123907016	68578112	124723224	27242420	127051072	24795002	0	16268631	9995145	5251699	46366792	25114110	15769305	6069790	29291480	2223362	14827455	9804483	43815636	815158	16730361	4260584	48387040	7338012	575221	367035	18652450	6882616	266289040	16904322	119767840
Q71DI3	Histone H3.2 (H3-clustered histone 13) (H3-clustered histone 14) (H3-clustered histone 15) (Histone H3/m) (Histone H3/o)	H32	K[+42]SAPATGGVK[+14]	181851120	390289632	222770544	453606176	42191344	317396608	0	100097	140797984	467697280	12429584	241192960	0	572773760	772056960	352918176	685064192	444393696	232693408	0	0	0	77502520	118338712	68293408	446110624	105390872	149530432	74491296	322325536	35393872	166499760	183344416	230973552	41906504	164778160	56838752	232417760	89672392	135150400	71960384	228403248	72073128	2997378048	338010048	1309046912
Q71DI3	Histone H3.2 (H3-clustered histone 13) (H3-clustered histone 14) (H3-clustered histone 15) (Histone H3/m) (Histone H3/o)	H32	K[+14]SAPATGGVK[+28]	870891200	906146304	1034744512	1096857856	981598464	992161152	1270155776	1139134080	1286739200	4147999488	1843854336	1591027840	3587583232	3797570048	1810995840	2932942592	4806260224	3260764160	1288633984	2806834176	1605485568	2133197440	150104128	397719584	519176192	2161470976	1294479616	894647488	529847008	2213863424	92193752	507560160	934978944	605456640	111273968	571690432	323288896	2218268672	114864992	451225184	360937088	321517216	509933888	14584279040	1310958592	6327246848
Q71DI3	Histone H3.2 (H3-clustered histone 13) (H3-clustered histone 14) (H3-clustered histone 15) (Histone H3/m) (Histone H3/o)	H32	K[+14]SAPATGGVK[+14]	2298650368	4855815680	0	49768	0	39603	0	6490071040	3704126464	8701023232	0	0	7529805312	16429221888	52509	11412555776	12468908032	13132226560	7193037824	14513525760	0	105796	3087553280	2542663680	1484776576	3378660864	2903006720	3026352640	1509015424	3301628160	1204877312	3111782656	1961947904	3202819072	1474392448	3315737088	1099794688	3543958528	2059600512	2875054336	867758272	1712493056	1209791616	30508152832	3252126976	11901887488
Q71DI3	Histone H3.2 (H3-clustered histone 13) (H3-clustered histone 14) (H3-clustered histone 15) (Histone H3/m) (Histone H3/o)	H32	SAPATGGVK[+28]	595490	654589	600653	3809101	508722	855964	86577	2620497	629695	1171261	764739	631916	95055304	2093947	62966	880851840	147815	1736396	0	651503808	97905	860253	33116794	531643808	2429652	255638896	18986962	590246592	4108351	13716918	31319444	602064448	27203886	274207392	19200430	738057472	7223472	13756543	24431514	612211904	37809084	12895968	72633312	1281091840	17592544	22280004
Q71DI3	Histone H3.2 (H3-clustered histone 13) (H3-clustered histone 14) (H3-clustered histone 15) (Histone H3/m) (Histone H3/o)	H32	SAPATGGVK[+14]	671608	0	2921985	298760	3126955	16532687	3735740	26034620	1998611	9944084	3020041	5049845	578950	8380878	9128476	16536355	214984	19993510	74023	31492556	121330	4076319	13530657	1329286656	18003052	48016248	10781170	1347018112	10273566	38150096	314268	1357883392	14796499	22039952	9148408	1679009152	11341654	27487714	7800363	1447514624	87142576	53564500	10964929	2236758784	65124920	72440592
Q71DI3	Histone H3.2 (H3-clustered histone 13) (H3-clustered histone 14) (H3-clustered histone 15) (Histone H3/m) (Histone H3/o)	H32	K[+28]SAPATGGVKKPHR	0	92879	0	380912	217444	620920	0	199523	0	34165	0	0	0	0	795013	29382110	4573166	5415611	0	605517	366193	0	3551557	330531	0	198748	764776	185210	187613	0	1447026	114684	0	0	2185684	218178	9644	0	2512857	247256	0	0	60830	16661155	21042	155697
Q71DI3	Histone H3.2 (H3-clustered histone 13) (H3-clustered histone 14) (H3-clustered histone 15) (Histone H3/m) (Histone H3/o)	H32	K[+28]SAPATGGVKKPHR	0	0	0	0	0	0	0	0	0	0	0	0	0	0	2120595	0	0	0	0	792549	2471435	0	0	1413360	0	0	0	1030784	0	0	0	0	202216	0	0	1151471	0	0	0	1043857	77022	144479	144626	39584604	54383	0
Q71DI3	Histone H3.2 (H3-clustered histone 13) (H3-clustered histone 14) (H3-clustered histone 15) (Histone H3/m) (Histone H3/o)	H32	K[+28]SAPATGGVKKPHR	1011528	239575	1840988	963754	2737311	2579802	3260213	1200184	2220963	35190	1181602	5101039	0	652107	1698065	54735100	2388132	4570679	0	5033496	2364980	0	6778090	1334160	257322	663572	5287557	795172	2366166	177011	2066245	366178	99408	225626	5844995	760718	39453	92121	4675048	941328	110261	111922	75122	25246956	81008	1358944
Q71DI3	Histone H3.2 (H3-clustered histone 13) (H3-clustered histone 14) (H3-clustered histone 15) (Histone H3/m) (Histone H3/o)	H32	KSAPATGGVK[+28]KPHR	48837	1763153	0	52632	558597	7352201	12876510	671246	13573442	6242722	58612	11764948	2422244	54045880	1452479	54679412	11460172	5889640	6933489	2660809	2855926	192650	19511554	1545433	962553	423613	5741062	1263780	485562	311563	6992266	1470619	509032	207066	993364	1313204	1963968	681307	6658137	1069326	242299	1273497	4873274	36418712	609006	126159
Q71DI3	Histone H3.2 (H3-clustered histone 13) (H3-clustered histone 14) (H3-clustered histone 15) (Histone H3/m) (Histone H3/o)	H32	KSAPATGGVK[+42]KPHR	0	0	0	0	0	19406	883879	0	0	0	0	1685642	251779	0	0	0	0	0	0	0	1162709	0	24415	1088511	31101	15856	10136	759733	277781	0	0	610104	64338	85288	161249	557707	325310	30757	2124413	760017	51399	89493	23863	91000768	210147	0
Q71DI3	Histone H3.2 (H3-clustered histone 13) (H3-clustered histone 14) (H3-clustered histone 15) (Histone H3/m) (Histone H3/o)	H32	KSAPATGGVK[+42]KPHR	0	0	0	0	0	0	0	0	0	0	0	0	1249014	0	0	0	0	0	0	0	7251707	0	0	4368814	301978	0	0	4257660	0	62875	0	3181959	0	320532	0	2804232	0	70233	0	3219168	267516	924558	158811	149157040	345423	0
Q71DI3	Histone H3.2 (H3-clustered histone 13) (H3-clustered histone 14) (H3-clustered histone 15) (Histone H3/m) (Histone H3/o)	H32	KSAPATGGVKK[+42]PHR	0	0	405763	0	732740	0	131283	0	1691993	0	0	265836	0	0	261408	0	3280658	0	0	0	1128396	253251	5882	463521	361249	15890	26296	771714	729809	15056	0	629074	63930	93063	279639	558421	326921	5084	1064499	688829	723593	7607	0	88792288	0	0
Q71DI3	Histone H3.2 (H3-clustered histone 13) (H3-clustered histone 14) (H3-clustered histone 15) (Histone H3/m) (Histone H3/o)	H32	K[+28]SAPATGGVK[+28]KPHR	0	0	0	0	0	0	0	40333	2919675	1565089	2606174	2558601	0	0	0	203349	0	432336	0	1001112	687656	0	799700	2853809	195495	14373	595158	2420631	702491	349068	702780	1614694	667442	202241	472943	1658812	737365	280775	387983	2155601	691592	0	1514683	137803968	10533730	99284
Q71DI3	Histone H3.2 (H3-clustered histone 13) (H3-clustered histone 14) (H3-clustered histone 15) (Histone H3/m) (Histone H3/o)	H32	K[+28]SAPATGGVK[+28]KPHR	0	25960	56901	558708	47733	0	766407	950823	0	1958014	0	0	147409	0	1056737	349449	1007390	999675	0	1257905	2624318	40891	3656671	8784334	107983	44610	1893127	7333265	40411	3246158	1412648	7298042	566100	2750048	1742068	5774060	64463	3220246	4731494	4832327	2826268	641279	873479	170372496	389712	5278606
Q71DI3	Histone H3.2 (H3-clustered histone 13) (H3-clustered histone 14) (H3-clustered histone 15) (Histone H3/m) (Histone H3/o)	H32	K[+14]SAPATGGVK[+28]KPHR	51518	0	0	0	0	0	0	0	0	0	1182682	1667706	3392033	33132738	2597603	0	0	21664304	934308	9497284	865586	282684	17753	1089335	1191333	32160	12399	759733	278815	40733	0	610104	64316	126878	279663	558303	398824	30537	1062299	687349	720065	88389	49	90204280	208258	0
Q71DI3	Histone H3.2 (H3-clustered histone 13) (H3-clustered histone 14) (H3-clustered histone 15) (Histone H3/m) (Histone H3/o)	H32	K[+14]SAPATGGVK[+28]KPHR	0	0	0	0	0	0	0	0	0	0	853641	0	0	25584860	0	0	0	17518206	0	10378394	0	23534	0	4402764	0	0	0	4257660	0	0	0	3181959	0	387247	0	2816877	0	70129	0	2855858	0	900626	34465	153931328	345176	0
Q71DI3	Histone H3.2 (H3-clustered histone 13) (H3-clustered histone 14) (H3-clustered histone 15) (Histone H3/m) (Histone H3/o)	H32	K[+14]SAPATGGVK[+42]KPHR	547490	87025	94788	0	121253	2578401	0	0	0	84175	564223	0	145483	350899	0	77029	0	5466292	250850	0	451654	2849411	3266973	8776658	108031	2249554	749654	7333265	250021	341541	1026247	7298042	568228	3093156	1027501	5773577	1880802	2928352	3976672	4999021	2609952	515533	1480278	178448736	6441548	5334820
Q71DI3	Histone H3.2 (H3-clustered histone 13) (H3-clustered histone 14) (H3-clustered histone 15) (Histone H3/m) (Histone H3/o)	H32	K[+14]SAPATGGVKK[+28]PHR	0	0	2323231	0	1229727	0	0	0	0	1717805	2222479	0	0	25520558	11537199	13872202	3197155	17268138	0	0	6577947	0	0	4395618	293711	0	19383	4257660	167366	62944	0	3181959	213549	347682	0	2809314	0	70162	0	2857656	269655	900798	167868	157461968	346726	0
Q71DI3	Histone H3.2 (H3-clustered histone 13) (H3-clustered histone 14) (H3-clustered histone 15) (Histone H3/m) (Histone H3/o)	H32	KSAPATGGVK[+28]K[+14]PHR	598495	50066	2336216	0	1226030	0	0	0	1307882	1827068	2193165	0	1249192	25464932	9083226	0	0	113182	0	26351872	6572819	2603489	0	4418231	318778	208588	19232	4257660	167154	63019	0	3181959	518692	346452	0	2794817	7800	70178	0	3026218	273209	920331	187613	151386672	349075	0
Q71DI3	Histone H3.2 (H3-clustered histone 13) (H3-clustered histone 14) (H3-clustered histone 15) (Histone H3/m) (Histone H3/o)	H32	K[+28]SAPATGGVKK[+14]PHR[+14]	4756104	11864518	9140898	8877563	20890760	8370946	1366217	9763096	2015990	1829449	2616708	1697475	5411906	25466080	8461430	61967528	2725271	4600075	3744408	15516935	2779123	3012387	956913	1710072	1618555	387341	748113	2184668	702092	358869	702933	1554911	672620	202311	2901342	1704094	737237	281030	509886	2170398	0	264047	1526181	139878816	4938811	193361
Q71DI3	Histone H3.2 (H3-clustered histone 13) (H3-clustered histone 14) (H3-clustered histone 15) (Histone H3/m) (Histone H3/o)	H32	K[+14]SAPATGGVK[+14]K[+28]PHR	316884	11804337	9426707	8991224	2261550	11958893	1363903	9673625	2010336	1424039	2617586	1706072	5374016	25534316	8527028	61918932	2867602	4530641	3701914	4203437	2781057	254038	957969	2866544	1614074	387757	749181	2340828	697332	357946	703579	1565076	661406	200556	327818	1658839	737485	279383	508626	2170247	0	262026	1532329	139830864	594714	191900
Q71DI3	Histone H3.2 (H3-clustered histone 13) (H3-clustered histone 14) (H3-clustered histone 15) (Histone H3/m) (Histone H3/o)	H32	K[+14]SAPATGGVK[+14]K[+14]PHR	320356	0	386342	0	687743	0	1776186	121671	1680358	2000728	1143413	244177	3401870	33047722	2612941	21513702	3293047	21726028	1294482	6648918	1128383	3803744	12652	463546	1160946	0	3942	771714	197288	15060	0	629074	63766	93299	279820	557911	325466	491258	2124335	687921	722902	0	0	89083768	281304	4653842
Q71DI3	Histone H3.2 (H3-clustered histone 13) (H3-clustered histone 14) (H3-clustered histone 15) (Histone H3/m) (Histone H3/o)	H32	SAPATGGVK[+28]KPHR	0	0	175517	0	0	0	0	0	0	718317	0	217149	1087861	0	725109	1499751	0	0	242674	2836128	0	133408	303730	4610908	741810	0	251347	4250653	140643	1257529	271051	4116122	615176	1051112	99270	210048	283694	0	0	3375155	1814743	377967	1667606	107311704	10229966	0
Q71DI3	Histone H3.2 (H3-clustered histone 13) (H3-clustered histone 14) (H3-clustered histone 15) (Histone H3/m) (Histone H3/o)	H32	SAPATGGVK[+28]KPHR	84443	1069071	83310	285644	34778	2215791	0	1233244	0	419535	83024	74360	203678	1273016	183565	0	222356	62444	68050	3365476	0	94527	146644	13446860	561563	16630649	42802	12378849	106390	731246	51615	8406131	524012	1115183	0	93143264	247957	25995690	2787022	10637588	9186229	1511129	1062621	246591280	8828020	3719707
Q71DI3	Histone H3.2 (H3-clustered histone 13) (H3-clustered histone 14) (H3-clustered histone 15) (Histone H3/m) (Histone H3/o)	H32	SAPATGGVKK[+28]PHR	0	0	0	0	435966	0	0	0	0	0	162287	0	1088043	0	953423	0	0	0	186964	2886043	1906963	397766	331384	4950946	741918	874146	251636	4250653	119224	1241637	271105	4116122	615265	1548286	0	163746	265673	0	0	3825469	269929	377979	1668218	109010536	10233136	0
Q71DI3	Histone H3.2 (H3-clustered histone 13) (H3-clustered histone 14) (H3-clustered histone 15) (Histone H3/m) (Histone H3/o)	H32	SAPATGGVKK[+28]PHR	77447	27288	289777	579946	405674	1749919	1409294	519021	256781	242480	0	67502	203700	282758	246075	148869	0	27706852	99596	3578844	7671326	133535	148178	14119895	555339	531165	42684	12378849	165027	496583	52957	8406131	522065	1109284	3563569	94209888	199763	26182360	2637140	4700110	23344708	1511062	1062384	244503024	8833836	189981
Q71DI3	Histone H3.2 (H3-clustered histone 13) (H3-clustered histone 14) (H3-clustered histone 15) (Histone H3/m) (Histone H3/o)	H32	SAPATGGVKK[+14]PHR[+14]	1577564	2873	62490980	1594739	1285650	86031	174486	1667709	88364	3257814	6795089	13058523	0	35220172	16785352	24485482	12643823	27507426	9591331	7462892	0	9722869	142841	12925386	628354	13040536	1507670	12378849	706782	11178772	3822523	8406131	550224	11742816	3508643	346590	3831956	13159585	271112	14005639	9250162	1511487	1062548	242695504	8810482	25636342
Q71DI3	Histone H3.2 (H3-clustered histone 13) (H3-clustered histone 14) (H3-clustered histone 15) (Histone H3/m) (Histone H3/o)	H32	EIAQDFK[+14]	128859528	0	215809072	0	0	0	130819640	0	138132800	0	232323008	216176736	214807088	1095068800	292567648	0	296862464	0	0	0	0	37170	151135120	223811152	65586984	370672192	115182744	212357232	90802144	294508736	181608640	151651216	50547392	342153312	110881472	315273184	82899944	277065376	174923744	263978992	27281366	280548192	356940672	59375	201860752	306673216
Q71DI3	Histone H3.2 (H3-clustered histone 13) (H3-clustered histone 14) (H3-clustered histone 15) (Histone H3/m) (Histone H3/o)	H32	LVR[+14]EIAQDFKTDLR	253979	460366	1923765	553350	146598	310974	2654441	430581	370424	237991	3288258	161939	1217675	404813	288502	4156607	638854	20545	1642169	123562	340604	24898	4524081	206155	389930	1121175	2075422	465138	1709986	162590	1762312	215846	166126	1286541	1461129	185523	667964	243520	2664495	25415	1300207	1503641	216100	1361085	1472167	407043
Q71DI3	Histone H3.2 (H3-clustered histone 13) (H3-clustered histone 14) (H3-clustered histone 15) (Histone H3/m) (Histone H3/o)	H32	LVR[+28]EIAQDFKTDLR	0	6843342	0	5884854	0	0	4117164	11944922	0	353136	10825360	0	275363	0	1174603	1644777	0	0	0	2377323	0	0	564859	93653	1350960	0	8987483	458330	0	0	1340213	498987	9009749	33070	0	0	0	824456	1738755	129511	2859268	76593	0	57626172	732418	43485724
Q71DI3	Histone H3.2 (H3-clustered histone 13) (H3-clustered histone 14) (H3-clustered histone 15) (Histone H3/m) (Histone H3/o)	H32	LVREIAQDFK[+14]TDLR	407532	0	0	0	0	0	0	0	0	0	130019	0	0	160777	0	0	683254	0	35209884	0	0	0	92026968	76574096	0	36469704	68274760	0	448080	42179636	76362600	0	28728432	42320168	48771336	140747872	19498338	56919160	87873160	144472368	11945481	30185492	214247680	2098587	65639092	286752288
Q71DI3	Histone H3.2 (H3-clustered histone 13) (H3-clustered histone 14) (H3-clustered histone 15) (Histone H3/m) (Histone H3/o)	H32	LVREIAQDFK[+14]TDLR	4981278	262621	1925248	335613	1929361	192819	798955	565108	1007348	84929	313308	249238	1223210	185004	0	238689	1517168	0	668829	0	0	55119	0	104126	256286	1365021	726254	465066	84454	934073	0	215891	0	1382201	1158254	62297	0	504714	0	117061	395804	780634	852614	3231084	181665	1749422
Q71DI3	Histone H3.2 (H3-clustered histone 13) (H3-clustered histone 14) (H3-clustered histone 15) (Histone H3/m) (Histone H3/o)	H32	EIAQDFK[+28]TDLR	17785790	1087410944	3890663	863931712	919193536	200966	23630396	1108634112	998735424	1061079	1463576064	17656742	8982600	268591	10797181	3734434816	14795316	3479499776	0	2914267392	0	1585781632	66804632	49665780	113822728	108172888	42219076	34009544	140758544	83151264	364923488	19246366	76447152	95733624	367504768	47748988	163000288	77948224	434047520	44028164	29067184	79042976	1245278592	162629	306389440	312712416
Q71DI3	Histone H3.2 (H3-clustered histone 13) (H3-clustered histone 14) (H3-clustered histone 15) (Histone H3/m) (Histone H3/o)	H32	EIAQDFK[+28]TDLR	281320	108011024	506348	86133832	139073984	0	393368	57410716	135951648	130801	331012992	405829	742562	0	0	887833280	454928	838849664	177373	826561856	455147	484224416	1133108	36828140	36496204	12892964	1990023	30762176	59320480	19568178	1678476	17328584	0	19902396	13295852	33507274	53435440	17794468	8409202	35078708	726714	19747400	83874464	146398	30102296	93162976
Q71DI3	Histone H3.2 (H3-clustered histone 13) (H3-clustered histone 14) (H3-clustered histone 15) (Histone H3/m) (Histone H3/o)	H32	EIAQDFK[+14]TDLR	101536232	38325848	0	1999690	4947312	3405496	11656322048	5250078	0	29515958	3480986	0	16248921088	2220201	0	15087982592	1072213	13171148800	359694	15506390016	0	61762	3343098624	349783840	1081084288	592533312	2485270528	246957840	1158401792	458893792	2831600640	137708576	818668928	494711840	3079651328	342563264	1080855936	461847104	3117533184	333611008	358846208	528769408	6832487424	61897508	2022540416	1776140032
Q71DI3	Histone H3.2 (H3-clustered histone 13) (H3-clustered histone 14) (H3-clustered histone 15) (Histone H3/m) (Histone H3/o)	H32	EIAQDFK[+14]TDLR	26167658	7673304	0	1336001	0	904793	1371577728	83257	0	9986118	457519	0	2892307456	0	0	3726294272	0	3195313408	0	4313569280	0	0	29001322	243235696	268822752	118714520	14056977	210625680	420288352	135883024	57878948	122408376	4708996	130323376	69761256	256013840	331425152	147624768	44876252	245853600	44905164	135553552	451835264	26585902	234126736	552269824
Q71DI3	Histone H3.2 (H3-clustered histone 13) (H3-clustered histone 14) (H3-clustered histone 15) (Histone H3/m) (Histone H3/o)	H32	R[+14]VTIMPKDIQLAR	10281114	1391016	8744319	1174071	52524960	479896	76687456	8651306	0	9451400	15839573	0	0	13735113	0	42075256	6608258	19411956	67557232	14919729	0	15991340	284988768	172901	107260832	157956	294763680	439624	7951205	804867	148858640	795467	459345536	275508	144115568	304981	39456040	2128488	109747752	311767	238875632	555578	123605584	46129376	6628392	340784832
Q71DI3	Histone H3.2 (H3-clustered histone 13) (H3-clustered histone 14) (H3-clustered histone 15) (Histone H3/m) (Histone H3/o)	H32	R[+14]VTIMPKDIQLAR	1028035	0	980886	41389	0	33846	16165788	1097252	0	3587829	2722050	0	0	3348955	0	0	1735417	6838058	492495	5772789	47160	6945729	0	22134	650990	64703	514960	66239	169237	210221	0	182729	1328670	192178	0	67003	6366124	1371569	0	39979	2271510	120998	0	11404536	267587	84998624
Q6NXT2	Histone H3.3C (Histone H3.5)	H3C	EIAQDFNTDLR[+14]	1019820864	0	1672920576	11467470	257776	12335642	1507567360	8194179	0	0	1421198336	1676665984	630088896	1063804800	698302	14171450	0	16078217	0	261767952	0	47497	1678107520	77431008	50160316	40300168	966141440	58043684	33669048	23163914	1247854336	22817724	383025184	30059216	865058176	58704872	46275224	22877212	817015360	65209264	206459472	31918858	4521965056	27740170	1328095232	64474564
Q6NXT2	Histone H3.3C (Histone H3.5)	H3C	R[+14]VTIMPKDIQLAR	10281114	1391016	8744319	1174071	52524960	479896	76687456	8651306	0	9451400	15839573	0	0	13735113	0	42075256	6608258	19411956	67557232	14919729	0	15991340	284988768	172901	107260832	157956	294763680	439624	7951205	804867	148858640	795467	459345536	275508	144115568	304981	39456040	2128488	109747752	311767	238875632	555578	123605584	46129376	6628392	340784832
Q6NXT2	Histone H3.3C (Histone H3.5)	H3C	R[+14]VTIMPKDIQLAR	1028035	0	980886	41389	0	33846	16165788	1097252	0	3587829	2722050	0	0	3348955	0	0	1735417	6838058	492495	5772789	47160	6945729	0	22134	650990	64703	514960	66239	169237	210221	0	182729	1328670	192178	0	67003	6366124	1371569	0	39979	2271510	120998	0	11404536	267587	84998624
Q9P0M6	Core histone macro-H2A.2 (Histone macroH2A2) (mH2A2)	H2AW	GK[+14]SETILSPPPEK	247001	0	4445	0	0	0	514816	0	0	0	612910	0	0	80864	156626	0	0	0	0	0	607589	0	0	0	5757800	0	0	0	3440272	0	0	0	0	0	0	0	2374939	1197217	0	0	301682	0	43336356	1931712	0	545330
Q9P0M6	Core histone macro-H2A.2 (Histone macroH2A2) (mH2A2)	H2AW	GK[+14]SETILSPPPEKR	200945	0	0	0	397682	0	0	0	0	188331	7200050	2269017	697514	9227324	6202731	5570610	10527976	434341	1271929	4615752	4721617	0	0	0	287277	0	0	0	695545	0	0	0	375745	0	412811	0	212635	0	234797	0	1474018	0	917705	0	473708	678200
Q9P0M6	Core histone macro-H2A.2 (Histone macroH2A2) (mH2A2)	H2AW	GK[+14]SETILSPPPEKR	659885	0	0	211775	327844	497678	885028	2197	0	449009	7816676	5816421	910225	7042392	12767897	454407	12899568	496522	3379438	1709283	4244988	98182	1141933	59401500	8568217	2897604	16079371	41019476	15249033	408766	1601855	48415000	666228	290191	0	71778576	1324911	1245803	7160862	36638348	1302408	192809	3533483	1034116	2930272	896341
Q9P0M6	Core histone macro-H2A.2 (Histone macroH2A2) (mH2A2)	H2AW	GK[+14]SETILSPPPEKR	326871	0	0	0	208186	0	0	0	0	0	2273427	1549197	166633	2669801	2445698	2158481	4029262	151816	1366185	3698084	882416	0	0	126490	149319	0	0	46852	581408	0	0	75923	60386	0	0	30579	352854	0	0	0	196777	0	973908	0	94348	0
P22492	Histone H1t (Testicular H1 histone)	H1T	K[+28]ALAAAGYDVEK	1032088	0	38899	1914683	0	0	888815	2725784	3604714	0	42731	720392	0	0	302011	3436247	0	369844	0	4431879	12633208	4972470	5482722	3482388	0	4889575	4759770	4399105	1347513	3918765	5250984	1523687	0	7788763	3998973	8692715	443036	2281750	303395	5247831	1604153	5717960	211231	11114346	3718462	1874999
P22492	Histone H1t (Testicular H1 histone)	H1T	K[+14]ALAAAGYDVEK	0	14613	0	1681670	0	0	0	0	0	7548	194671808	200317440	0	0	87579288	0	79338008	109022112	40718284	137038896	0	0	46133096	7503907	5031105	4337488	30360950	7535831	10204935	3387169	53279572	5132489	5314056	4463263	36728716	9606653	397412	4380790	23442034	9217290	1035607	2497494	61309944	1115716	7396339	13777622
P22492	Histone H1t (Testicular H1 histone)	H1T	K[+14]ALAAAGYDVEK	0	0	0	1249724	0	39344	0	30946	0	0	21572516	28427996	0	0	6053620	443334	6255252	13064931	3250128	26169696	0	0	2156492	2478740	0	835760	1239057	2192004	737915	907274	1447976	1801276	0	620064	0	3670860	0	890625	0	2763780	283705	580208	4877442	170150	0	3826771
Q8N5V2	Ephexin-1 (Eph-interacting exchange protein) (Neuronal guanine nucleotide exchange factor)	NGEF	STLQEIETR[+14]R	0	0	0	0	0	0	0	0	0	0	0	2842310	0	288719	75254	609722	4398087	0	1673448	878159	5082741	1346298	0	0	0	0	0	0	593847	137656	0	0	0	0	0	0	0	22789	1801245	0	0	0	441096	874206	421277	0
P04908	Histone H2A type 1-B/E (Histone H2A.2) (Histone H2A/a) (Histone H2A/m)	H2A1B	VTIAQGGVLPNIQAVLLPK[+14]K	0	0	0	0	33971308	0	0	0	0	26336310	0	138651376	105156152	29417044	29862926	0	159629520	0	0	0	41353112	0	7362853	2760158	7511480	2331029	662371	13491653	11732688	0	6618845	6047942	27572518	936490	4186756	8925174	12656608	0	6751260	1193198	15257412	1013427	30908248	91772872	12045954	1275294
P04908	Histone H2A type 1-B/E (Histone H2A.2) (Histone H2A/a) (Histone H2A/m)	H2A1B	VTIAQGGVLPNIQAVLLPK[+14]K	0	0	0	0	18420340	0	0	0	0	35866000	0	108430048	58861336	13843239	16850344	37777	62829832	0	0	0	11532405	0	6622705	1882042	10000177	0	0	8256219	15146871	0	7960776	5496246	27929802	969838	6901507	6650418	14469744	0	7447556	1940675	13587196	3631118	25220564	196124208	9184988	0
P04908	Histone H2A type 1-B/E (Histone H2A.2) (Histone H2A/a) (Histone H2A/m)	H2A1B	VTIAQGGVLPNIQAVLLPKK[+28]	391619	576791	2879547	0	2149163	67950	3363778	792097	2019146	5812894	1844214	5906470	0	1942107	1924266	8213402	11609917	3516274	0	16980018	0	524260		951659	2843401		0	469226	4312213		1771734	0	0	741672	551663	0	8313831	0	3065171	0	0	0	344569	0	720861	591488
P04908	Histone H2A type 1-B/E (Histone H2A.2) (Histone H2A/a) (Histone H2A/m)	H2A1B	VTIAQGGVLPNIQAVLLPKK[+14]	0	8113829	9740037	0	0	2102874	0	0	0	26186822	0	0	105156152	0	27726598	0	0	10899217	0	76890184	0	0	7363518	2732726	7511867	2331029	662437	13447692	11732688	0	5421855	6048222	27562720	938464	4308528	8923609	12656608	0	6751260	1192727	15257412	1023476	27815424	86686168	12049950	1275294
P04908	Histone H2A type 1-B/E (Histone H2A.2) (Histone H2A/a) (Histone H2A/m)	H2A1B	VTIAQGGVLPNIQAVLLPKK[+14]	0	7654371	5094854	0	0	1456778	0	0	0	35416452	0	0	58861336	0	15720377	37463	0	6649838	0	48620212	0	0	6623263	1881882	10000751	0	0	8229317	15146871	0	6687347	5473849	27923184	971882	7240283	6647184	14469744	0	7447556	1840152	13587196	3635417	22526130	203208784	9441976	0
P68431	Histone H3.1 (Histone H3/a) (Histone H3/b) (Histone H3/c) (Histone H3/d) (Histone H3/f) (Histone H3/h) (Histone H3/i) (Histone H3/j) (Histone H3/k) (Histone H3/l)	H31	K[+28]SAPATGGVK	10133	71874	510482	82314	69237	44970	99174	175179	300603	6093173	6412356096	68989	80760	716625	473351	145450	55090	166231	14619254	15757261	12076858	61259	2621134336	2533972480	1513927296	3391065088	2941268480	3039100160	1497966208	3283012608	1205428864	3114025728	1954453376	3195758848	1528529664	3508311808	1105079040	3528718848	2025090432	2862226688	878772288	1729545344	1200224640	30517514240	3248472832	11929141248
P68431	Histone H3.1 (Histone H3/a) (Histone H3/b) (Histone H3/c) (Histone H3/d) (Histone H3/f) (Histone H3/h) (Histone H3/i) (Histone H3/j) (Histone H3/k) (Histone H3/l)	H31	K[+42]SAPATGGVK	1647922	417324	11267538	35259192	8023924	35045140	10869724	43743352	13236760	42248780	926697600	73873	12049047	3820984320	4309412	2511250	13394494	10887096	1277187968	2131316	189715	2134777088	148392864	733681472	515716800	2154445056	1279306496	897748672	536384192	2228788736	92831040	978882432	924724032	1690999680	112889720	1032033920	252304960	2222041344	116442712	855703488	364367776	871576384	509357664	14520635392	1299011712	6254875648
P68431	Histone H3.1 (Histone H3/a) (Histone H3/b) (Histone H3/c) (Histone H3/d) (Histone H3/f) (Histone H3/h) (Histone H3/i) (Histone H3/j) (Histone H3/k) (Histone H3/l)	H31	K[+14]SAPATGGVK	5384625	1393738	507527872	918009	5841230	2335605	19210184	13504294	5271951	4469918	943794688	0	288924	15442711	4008733	16712804	33655	3969740	2415841	6319852	15291	7136399	381198336	685313984	297954880	849076288	413771904	805475008	280944384	883964672	194277296	856137856	388643104	796491840	210538288	980474368	227350144	879215296	258538816	756169280	199456624	463086976	211770144	8385864192	469746304	2889005056
P68431	Histone H3.1 (Histone H3/a) (Histone H3/b) (Histone H3/c) (Histone H3/d) (Histone H3/f) (Histone H3/h) (Histone H3/i) (Histone H3/j) (Histone H3/k) (Histone H3/l)	H31	KSAPATGGVK[+28]	43034	74641	5139580	140080	4368699	90434	260517	21404	3699551488	114974	50510	4872136704	0	0	0	0	12455228416	0	0	349530	92468	269132	2621134336	2533972480	1513927296	3391065088	2941268480	3039100160	1497966208	3283012608	1205428864	3114025728	1285548288	3195758848	810576192	3508311808	1105079040	3528718848	2025090432	2862226688	878772288	1729545344	1200224640	26929014784	3248472832	11929141248
P68431	Histone H3.1 (Histone H3/a) (Histone H3/b) (Histone H3/c) (Histone H3/d) (Histone H3/f) (Histone H3/h) (Histone H3/i) (Histone H3/j) (Histone H3/k) (Histone H3/l)	H31	KSAPATGGVK[+28]	35340	889101	57464	1889258	61069	1627340	650953	303488	8945900	1706996	370205	13789041	780942	1558097	145269	638755	15066493	552238	168083	273627	631953	2489136	3420683	20335830	15990575	22809418	4376355	23304210	18707570	23183642	2227867	22753306	5912027	20627484	1158610	28674602	12805577	24546622	5419634	21498920	7493592	13547542	5495554	11941135	18151252	28953196
P68431	Histone H3.1 (Histone H3/a) (Histone H3/b) (Histone H3/c) (Histone H3/d) (Histone H3/f) (Histone H3/h) (Histone H3/i) (Histone H3/j) (Histone H3/k) (Histone H3/l)	H31	KSAPATGGVK[+14]	5388532	142183	8053530	144425	74984	123673	2198210	44069	2115684	194293584	85911	380875	747397376	5487614	716659392	74421	387779	14111675	5915290	6319852	369040	445096	381198336	685313984	241518880	849076288	413771904	767068672	280944384	883964672	194277296	568901440	388643104	796491840	210538288	980474368	227350144	879215296	258538816	153600208	199456624	463086976	169791408	6679679488	469746304	2165072896
P68431	Histone H3.1 (Histone H3/a) (Histone H3/b) (Histone H3/c) (Histone H3/d) (Histone H3/f) (Histone H3/h) (Histone H3/i) (Histone H3/j) (Histone H3/k) (Histone H3/l)	H31	KSAPATGGVK[+14]	0	26308	0	633892	0	0	1536716	786541	0	40105	0	72262	1918274	0	1779671	0	325332	36559	5098328	0	131112	132416	972790	4454559	540888	4354525	470133	2907570	2481047	4730209	402314	2750025	1862978	4543572	561501	6134348	2266738	4959629	351826	2602368	895842	2428489	909746	33450270	3013330	8264573
P68431	Histone H3.1 (Histone H3/a) (Histone H3/b) (Histone H3/c) (Histone H3/d) (Histone H3/f) (Histone H3/h) (Histone H3/i) (Histone H3/j) (Histone H3/k) (Histone H3/l)	H31	K[+28]SAPATGGVK[+28]	181672080	581701	20297586	1126779	42534640	122376	1521955	641343	76603872	1492310	158677648	335009	643245440	3257330	5797521	3843682	675846336	933435	491769	517575840	417857952	356951	78828752	117866096	67185664	432578688	107987056	152337344	73798896	320580864	36611568	163557520	184474368	234277808	40875188	164486384	56746256	231811232	90744856	135107664	71811288	229994640	70930000	3055262208	335519552	1301403648
P68431	Histone H3.1 (Histone H3/a) (Histone H3/b) (Histone H3/c) (Histone H3/d) (Histone H3/f) (Histone H3/h) (Histone H3/i) (Histone H3/j) (Histone H3/k) (Histone H3/l)	H31	K[+28]SAPATGGVK[+14]	4995649	129277	30699	112557	295288	141939	1269159296	605558	1287640704	4144854528	932628672	786517376	64438	157306	57623	2937067008	345573	27132	8963371	4006365952	31446	75639	148392864	733681472	515716800	2154445056	1279306496	897748672	536384192	2228788736	92831040	978882432	924724032	1690999680	112889720	1032033920	252304960	2222041344	116442712	855703488	364367776	871576384	509357664	14520635392	1299011712	6254875648
P68431	Histone H3.1 (Histone H3/a) (Histone H3/b) (Histone H3/c) (Histone H3/d) (Histone H3/f) (Histone H3/h) (Histone H3/i) (Histone H3/j) (Histone H3/k) (Histone H3/l)	H31	K[+42]SAPATGGVK[+28]	13482589	62436284	15563749	0	15785204	0	16909784	55005752	19609232	88578816	0	0	38726748	0	50692996	123907016	68578112	124723224	27242420	127051072	24795002	0	16268631	9995145	5251699	46366792	25114110	15769305	6069790	29291480	2223362	14827455	9804483	43815636	815158	16730361	4260584	48387040	7338012	575221	367035	18652450	6882616	266289040	16904322	119767840
P68431	Histone H3.1 (Histone H3/a) (Histone H3/b) (Histone H3/c) (Histone H3/d) (Histone H3/f) (Histone H3/h) (Histone H3/i) (Histone H3/j) (Histone H3/k) (Histone H3/l)	H31	K[+42]SAPATGGVK[+14]	181851120	390289632	222770544	453606176	42191344	317396608	0	100097	140797984	467697280	12429584	241192960	0	572773760	772056960	352918176	685064192	444393696	232693408	0	0	0	77502520	118338712	68293408	446110624	105390872	149530432	74491296	322325536	35393872	166499760	183344416	230973552	41906504	164778160	56838752	232417760	89672392	135150400	71960384	228403248	72073128	2997378048	338010048	1309046912
P68431	Histone H3.1 (Histone H3/a) (Histone H3/b) (Histone H3/c) (Histone H3/d) (Histone H3/f) (Histone H3/h) (Histone H3/i) (Histone H3/j) (Histone H3/k) (Histone H3/l)	H31	K[+14]SAPATGGVK[+28]	870891200	906146304	1034744512	1096857856	981598464	992161152	1270155776	1139134080	1286739200	4147999488	1843854336	1591027840	3587583232	3797570048	1810995840	2932942592	4806260224	3260764160	1288633984	2806834176	1605485568	2133197440	150104128	397719584	519176192	2161470976	1294479616	894647488	529847008	2213863424	92193752	507560160	934978944	605456640	111273968	571690432	323288896	2218268672	114864992	451225184	360937088	321517216	509933888	14584279040	1310958592	6327246848
P68431	Histone H3.1 (Histone H3/a) (Histone H3/b) (Histone H3/c) (Histone H3/d) (Histone H3/f) (Histone H3/h) (Histone H3/i) (Histone H3/j) (Histone H3/k) (Histone H3/l)	H31	K[+14]SAPATGGVK[+14]	2298650368	4855815680	0	49768	0	39603	0	6490071040	3704126464	8701023232	0	0	7529805312	16429221888	52509	11412555776	12468908032	13132226560	7193037824	14513525760	0	105796	3087553280	2542663680	1484776576	3378660864	2903006720	3026352640	1509015424	3301628160	1204877312	3111782656	1961947904	3202819072	1474392448	3315737088	1099794688	3543958528	2059600512	2875054336	867758272	1712493056	1209791616	30508152832	3252126976	11901887488
P68431	Histone H3.1 (Histone H3/a) (Histone H3/b) (Histone H3/c) (Histone H3/d) (Histone H3/f) (Histone H3/h) (Histone H3/i) (Histone H3/j) (Histone H3/k) (Histone H3/l)	H31	SAPATGGVK[+28]	595490	654589	600653	3809101	508722	855964	86577	2620497	629695	1171261	764739	631916	95055304	2093947	62966	880851840	147815	1736396	0	651503808	97905	860253	33116794	531643808	2429652	255638896	18986962	590246592	4108351	13716918	31319444	602064448	27203886	274207392	19200430	738057472	7223472	13756543	24431514	612211904	37809084	12895968	72633312	1281091840	17592544	22280004
P68431	Histone H3.1 (Histone H3/a) (Histone H3/b) (Histone H3/c) (Histone H3/d) (Histone H3/f) (Histone H3/h) (Histone H3/i) (Histone H3/j) (Histone H3/k) (Histone H3/l)	H31	SAPATGGVK[+14]	671608	0	2921985	298760	3126955	16532687	3735740	26034620	1998611	9944084	3020041	5049845	578950	8380878	9128476	16536355	214984	19993510	74023	31492556	121330	4076319	13530657	1329286656	18003052	48016248	10781170	1347018112	10273566	38150096	314268	1357883392	14796499	22039952	9148408	1679009152	11341654	27487714	7800363	1447514624	87142576	53564500	10964929	2236758784	65124920	72440592
P68431	Histone H3.1 (Histone H3/a) (Histone H3/b) (Histone H3/c) (Histone H3/d) (Histone H3/f) (Histone H3/h) (Histone H3/i) (Histone H3/j) (Histone H3/k) (Histone H3/l)	H31	K[+28]SAPATGGVKKPHR	0	92879	0	380912	217444	620920	0	199523	0	34165	0	0	0	0	795013	29382110	4573166	5415611	0	605517	366193	0	3551557	330531	0	198748	764776	185210	187613	0	1447026	114684	0	0	2185684	218178	9644	0	2512857	247256	0	0	60830	16661155	21042	155697
P68431	Histone H3.1 (Histone H3/a) (Histone H3/b) (Histone H3/c) (Histone H3/d) (Histone H3/f) (Histone H3/h) (Histone H3/i) (Histone H3/j) (Histone H3/k) (Histone H3/l)	H31	K[+28]SAPATGGVKKPHR	0	0	0	0	0	0	0	0	0	0	0	0	0	0	2120595	0	0	0	0	792549	2471435	0	0	1413360	0	0	0	1030784	0	0	0	0	202216	0	0	1151471	0	0	0	1043857	77022	144479	144626	39584604	54383	0
P68431	Histone H3.1 (Histone H3/a) (Histone H3/b) (Histone H3/c) (Histone H3/d) (Histone H3/f) (Histone H3/h) (Histone H3/i) (Histone H3/j) (Histone H3/k) (Histone H3/l)	H31	K[+28]SAPATGGVKKPHR	1011528	239575	1840988	963754	2737311	2579802	3260213	1200184	2220963	35190	1181602	5101039	0	652107	1698065	54735100	2388132	4570679	0	5033496	2364980	0	6778090	1334160	257322	663572	5287557	795172	2366166	177011	2066245	366178	99408	225626	5844995	760718	39453	92121	4675048	941328	110261	111922	75122	25246956	81008	1358944
P68431	Histone H3.1 (Histone H3/a) (Histone H3/b) (Histone H3/c) (Histone H3/d) (Histone H3/f) (Histone H3/h) (Histone H3/i) (Histone H3/j) (Histone H3/k) (Histone H3/l)	H31	KSAPATGGVK[+28]KPHR	48837	1763153	0	52632	558597	7352201	12876510	671246	13573442	6242722	58612	11764948	2422244	54045880	1452479	54679412	11460172	5889640	6933489	2660809	2855926	192650	19511554	1545433	962553	423613	5741062	1263780	485562	311563	6992266	1470619	509032	207066	993364	1313204	1963968	681307	6658137	1069326	242299	1273497	4873274	36418712	609006	126159
P68431	Histone H3.1 (Histone H3/a) (Histone H3/b) (Histone H3/c) (Histone H3/d) (Histone H3/f) (Histone H3/h) (Histone H3/i) (Histone H3/j) (Histone H3/k) (Histone H3/l)	H31	KSAPATGGVK[+42]KPHR	0	0	0	0	0	19406	883879	0	0	0	0	1685642	251779	0	0	0	0	0	0	0	1162709	0	24415	1088511	31101	15856	10136	759733	277781	0	0	610104	64338	85288	161249	557707	325310	30757	2124413	760017	51399	89493	23863	91000768	210147	0
P68431	Histone H3.1 (Histone H3/a) (Histone H3/b) (Histone H3/c) (Histone H3/d) (Histone H3/f) (Histone H3/h) (Histone H3/i) (Histone H3/j) (Histone H3/k) (Histone H3/l)	H31	KSAPATGGVK[+42]KPHR	0	0	0	0	0	0	0	0	0	0	0	0	1249014	0	0	0	0	0	0	0	7251707	0	0	4368814	301978	0	0	4257660	0	62875	0	3181959	0	320532	0	2804232	0	70233	0	3219168	267516	924558	158811	149157040	345423	0
P68431	Histone H3.1 (Histone H3/a) (Histone H3/b) (Histone H3/c) (Histone H3/d) (Histone H3/f) (Histone H3/h) (Histone H3/i) (Histone H3/j) (Histone H3/k) (Histone H3/l)	H31	KSAPATGGVKK[+42]PHR	0	0	405763	0	732740	0	131283	0	1691993	0	0	265836	0	0	261408	0	3280658	0	0	0	1128396	253251	5882	463521	361249	15890	26296	771714	729809	15056	0	629074	63930	93063	279639	558421	326921	5084	1064499	688829	723593	7607	0	88792288	0	0
P68431	Histone H3.1 (Histone H3/a) (Histone H3/b) (Histone H3/c) (Histone H3/d) (Histone H3/f) (Histone H3/h) (Histone H3/i) (Histone H3/j) (Histone H3/k) (Histone H3/l)	H31	K[+28]SAPATGGVK[+28]KPHR	0	0	0	0	0	0	0	40333	2919675	1565089	2606174	2558601	0	0	0	203349	0	432336	0	1001112	687656	0	799700	2853809	195495	14373	595158	2420631	702491	349068	702780	1614694	667442	202241	472943	1658812	737365	280775	387983	2155601	691592	0	1514683	137803968	10533730	99284
P68431	Histone H3.1 (Histone H3/a) (Histone H3/b) (Histone H3/c) (Histone H3/d) (Histone H3/f) (Histone H3/h) (Histone H3/i) (Histone H3/j) (Histone H3/k) (Histone H3/l)	H31	K[+28]SAPATGGVK[+28]KPHR	0	25960	56901	558708	47733	0	766407	950823	0	1958014	0	0	147409	0	1056737	349449	1007390	999675	0	1257905	2624318	40891	3656671	8784334	107983	44610	1893127	7333265	40411	3246158	1412648	7298042	566100	2750048	1742068	5774060	64463	3220246	4731494	4832327	2826268	641279	873479	170372496	389712	5278606
P68431	Histone H3.1 (Histone H3/a) (Histone H3/b) (Histone H3/c) (Histone H3/d) (Histone H3/f) (Histone H3/h) (Histone H3/i) (Histone H3/j) (Histone H3/k) (Histone H3/l)	H31	K[+14]SAPATGGVK[+28]KPHR	51518	0	0	0	0	0	0	0	0	0	1182682	1667706	3392033	33132738	2597603	0	0	21664304	934308	9497284	865586	282684	17753	1089335	1191333	32160	12399	759733	278815	40733	0	610104	64316	126878	279663	558303	398824	30537	1062299	687349	720065	88389	49	90204280	208258	0
P68431	Histone H3.1 (Histone H3/a) (Histone H3/b) (Histone H3/c) (Histone H3/d) (Histone H3/f) (Histone H3/h) (Histone H3/i) (Histone H3/j) (Histone H3/k) (Histone H3/l)	H31	K[+14]SAPATGGVK[+28]KPHR	0	0	0	0	0	0	0	0	0	0	853641	0	0	25584860	0	0	0	17518206	0	10378394	0	23534	0	4402764	0	0	0	4257660	0	0	0	3181959	0	387247	0	2816877	0	70129	0	2855858	0	900626	34465	153931328	345176	0
P68431	Histone H3.1 (Histone H3/a) (Histone H3/b) (Histone H3/c) (Histone H3/d) (Histone H3/f) (Histone H3/h) (Histone H3/i) (Histone H3/j) (Histone H3/k) (Histone H3/l)	H31	K[+14]SAPATGGVK[+42]KPHR	547490	87025	94788	0	121253	2578401	0	0	0	84175	564223	0	145483	350899	0	77029	0	5466292	250850	0	451654	2849411	3266973	8776658	108031	2249554	749654	7333265	250021	341541	1026247	7298042	568228	3093156	1027501	5773577	1880802	2928352	3976672	4999021	2609952	515533	1480278	178448736	6441548	5334820
P68431	Histone H3.1 (Histone H3/a) (Histone H3/b) (Histone H3/c) (Histone H3/d) (Histone H3/f) (Histone H3/h) (Histone H3/i) (Histone H3/j) (Histone H3/k) (Histone H3/l)	H31	K[+14]SAPATGGVKK[+28]PHR	0	0	2323231	0	1229727	0	0	0	0	1717805	2222479	0	0	25520558	11537199	13872202	3197155	17268138	0	0	6577947	0	0	4395618	293711	0	19383	4257660	167366	62944	0	3181959	213549	347682	0	2809314	0	70162	0	2857656	269655	900798	167868	157461968	346726	0
P68431	Histone H3.1 (Histone H3/a) (Histone H3/b) (Histone H3/c) (Histone H3/d) (Histone H3/f) (Histone H3/h) (Histone H3/i) (Histone H3/j) (Histone H3/k) (Histone H3/l)	H31	KSAPATGGVK[+28]K[+14]PHR	598495	50066	2336216	0	1226030	0	0	0	1307882	1827068	2193165	0	1249192	25464932	9083226	0	0	113182	0	26351872	6572819	2603489	0	4418231	318778	208588	19232	4257660	167154	63019	0	3181959	518692	346452	0	2794817	7800	70178	0	3026218	273209	920331	187613	151386672	349075	0
P68431	Histone H3.1 (Histone H3/a) (Histone H3/b) (Histone H3/c) (Histone H3/d) (Histone H3/f) (Histone H3/h) (Histone H3/i) (Histone H3/j) (Histone H3/k) (Histone H3/l)	H31	K[+28]SAPATGGVKK[+14]PHR[+14]	4756104	11864518	9140898	8877563	20890760	8370946	1366217	9763096	2015990	1829449	2616708	1697475	5411906	25466080	8461430	61967528	2725271	4600075	3744408	15516935	2779123	3012387	956913	1710072	1618555	387341	748113	2184668	702092	358869	702933	1554911	672620	202311	2901342	1704094	737237	281030	509886	2170398	0	264047	1526181	139878816	4938811	193361
P68431	Histone H3.1 (Histone H3/a) (Histone H3/b) (Histone H3/c) (Histone H3/d) (Histone H3/f) (Histone H3/h) (Histone H3/i) (Histone H3/j) (Histone H3/k) (Histone H3/l)	H31	K[+14]SAPATGGVK[+14]K[+28]PHR	316884	11804337	9426707	8991224	2261550	11958893	1363903	9673625	2010336	1424039	2617586	1706072	5374016	25534316	8527028	61918932	2867602	4530641	3701914	4203437	2781057	254038	957969	2866544	1614074	387757	749181	2340828	697332	357946	703579	1565076	661406	200556	327818	1658839	737485	279383	508626	2170247	0	262026	1532329	139830864	594714	191900
P68431	Histone H3.1 (Histone H3/a) (Histone H3/b) (Histone H3/c) (Histone H3/d) (Histone H3/f) (Histone H3/h) (Histone H3/i) (Histone H3/j) (Histone H3/k) (Histone H3/l)	H31	K[+14]SAPATGGVK[+14]K[+14]PHR	320356	0	386342	0	687743	0	1776186	121671	1680358	2000728	1143413	244177	3401870	33047722	2612941	21513702	3293047	21726028	1294482	6648918	1128383	3803744	12652	463546	1160946	0	3942	771714	197288	15060	0	629074	63766	93299	279820	557911	325466	491258	2124335	687921	722902	0	0	89083768	281304	4653842
P68431	Histone H3.1 (Histone H3/a) (Histone H3/b) (Histone H3/c) (Histone H3/d) (Histone H3/f) (Histone H3/h) (Histone H3/i) (Histone H3/j) (Histone H3/k) (Histone H3/l)	H31	SAPATGGVK[+28]KPHR	0	0	175517	0	0	0	0	0	0	718317	0	217149	1087861	0	725109	1499751	0	0	242674	2836128	0	133408	303730	4610908	741810	0	251347	4250653	140643	1257529	271051	4116122	615176	1051112	99270	210048	283694	0	0	3375155	1814743	377967	1667606	107311704	10229966	0
P68431	Histone H3.1 (Histone H3/a) (Histone H3/b) (Histone H3/c) (Histone H3/d) (Histone H3/f) (Histone H3/h) (Histone H3/i) (Histone H3/j) (Histone H3/k) (Histone H3/l)	H31	SAPATGGVK[+28]KPHR	84443	1069071	83310	285644	34778	2215791	0	1233244	0	419535	83024	74360	203678	1273016	183565	0	222356	62444	68050	3365476	0	94527	146644	13446860	561563	16630649	42802	12378849	106390	731246	51615	8406131	524012	1115183	0	93143264	247957	25995690	2787022	10637588	9186229	1511129	1062621	246591280	8828020	3719707
P68431	Histone H3.1 (Histone H3/a) (Histone H3/b) (Histone H3/c) (Histone H3/d) (Histone H3/f) (Histone H3/h) (Histone H3/i) (Histone H3/j) (Histone H3/k) (Histone H3/l)	H31	SAPATGGVKK[+28]PHR	0	0	0	0	435966	0	0	0	0	0	162287	0	1088043	0	953423	0	0	0	186964	2886043	1906963	397766	331384	4950946	741918	874146	251636	4250653	119224	1241637	271105	4116122	615265	1548286	0	163746	265673	0	0	3825469	269929	377979	1668218	109010536	10233136	0
P68431	Histone H3.1 (Histone H3/a) (Histone H3/b) (Histone H3/c) (Histone H3/d) (Histone H3/f) (Histone H3/h) (Histone H3/i) (Histone H3/j) (Histone H3/k) (Histone H3/l)	H31	SAPATGGVKK[+28]PHR	77447	27288	289777	579946	405674	1749919	1409294	519021	256781	242480	0	67502	203700	282758	246075	148869	0	27706852	99596	3578844	7671326	133535	148178	14119895	555339	531165	42684	12378849	165027	496583	52957	8406131	522065	1109284	3563569	94209888	199763	26182360	2637140	4700110	23344708	1511062	1062384	244503024	8833836	189981
P68431	Histone H3.1 (Histone H3/a) (Histone H3/b) (Histone H3/c) (Histone H3/d) (Histone H3/f) (Histone H3/h) (Histone H3/i) (Histone H3/j) (Histone H3/k) (Histone H3/l)	H31	SAPATGGVKK[+14]PHR[+14]	1577564	2873	62490980	1594739	1285650	86031	174486	1667709	88364	3257814	6795089	13058523	0	35220172	16785352	24485482	12643823	27507426	9591331	7462892	0	9722869	142841	12925386	628354	13040536	1507670	12378849	706782	11178772	3822523	8406131	550224	11742816	3508643	346590	3831956	13159585	271112	14005639	9250162	1511487	1062548	242695504	8810482	25636342
P68431	Histone H3.1 (Histone H3/a) (Histone H3/b) (Histone H3/c) (Histone H3/d) (Histone H3/f) (Histone H3/h) (Histone H3/i) (Histone H3/j) (Histone H3/k) (Histone H3/l)	H31	EIAQDFK[+14]	128859528	0	215809072	0	0	0	130819640	0	138132800	0	232323008	216176736	214807088	1095068800	292567648	0	296862464	0	0	0	0	37170	151135120	223811152	65586984	370672192	115182744	212357232	90802144	294508736	181608640	151651216	50547392	342153312	110881472	315273184	82899944	277065376	174923744	263978992	27281366	280548192	356940672	59375	201860752	306673216
P68431	Histone H3.1 (Histone H3/a) (Histone H3/b) (Histone H3/c) (Histone H3/d) (Histone H3/f) (Histone H3/h) (Histone H3/i) (Histone H3/j) (Histone H3/k) (Histone H3/l)	H31	LVR[+14]EIAQDFKTDLR	253979	460366	1923765	553350	146598	310974	2654441	430581	370424	237991	3288258	161939	1217675	404813	288502	4156607	638854	20545	1642169	123562	340604	24898	4524081	206155	389930	1121175	2075422	465138	1709986	162590	1762312	215846	166126	1286541	1461129	185523	667964	243520	2664495	25415	1300207	1503641	216100	1361085	1472167	407043
P68431	Histone H3.1 (Histone H3/a) (Histone H3/b) (Histone H3/c) (Histone H3/d) (Histone H3/f) (Histone H3/h) (Histone H3/i) (Histone H3/j) (Histone H3/k) (Histone H3/l)	H31	LVR[+28]EIAQDFKTDLR	0	6843342	0	5884854	0	0	4117164	11944922	0	353136	10825360	0	275363	0	1174603	1644777	0	0	0	2377323	0	0	564859	93653	1350960	0	8987483	458330	0	0	1340213	498987	9009749	33070	0	0	0	824456	1738755	129511	2859268	76593	0	57626172	732418	43485724
P68431	Histone H3.1 (Histone H3/a) (Histone H3/b) (Histone H3/c) (Histone H3/d) (Histone H3/f) (Histone H3/h) (Histone H3/i) (Histone H3/j) (Histone H3/k) (Histone H3/l)	H31	LVREIAQDFK[+14]TDLR	407532	0	0	0	0	0	0	0	0	0	130019	0	0	160777	0	0	683254	0	35209884	0	0	0	92026968	76574096	0	36469704	68274760	0	448080	42179636	76362600	0	28728432	42320168	48771336	140747872	19498338	56919160	87873160	144472368	11945481	30185492	214247680	2098587	65639092	286752288
P68431	Histone H3.1 (Histone H3/a) (Histone H3/b) (Histone H3/c) (Histone H3/d) (Histone H3/f) (Histone H3/h) (Histone H3/i) (Histone H3/j) (Histone H3/k) (Histone H3/l)	H31	LVREIAQDFK[+14]TDLR	4981278	262621	1925248	335613	1929361	192819	798955	565108	1007348	84929	313308	249238	1223210	185004	0	238689	1517168	0	668829	0	0	55119	0	104126	256286	1365021	726254	465066	84454	934073	0	215891	0	1382201	1158254	62297	0	504714	0	117061	395804	780634	852614	3231084	181665	1749422
P68431	Histone H3.1 (Histone H3/a) (Histone H3/b) (Histone H3/c) (Histone H3/d) (Histone H3/f) (Histone H3/h) (Histone H3/i) (Histone H3/j) (Histone H3/k) (Histone H3/l)	H31	EIAQDFK[+28]TDLR	17785790	1087410944	3890663	863931712	919193536	200966	23630396	1108634112	998735424	1061079	1463576064	17656742	8982600	268591	10797181	3734434816	14795316	3479499776	0	2914267392	0	1585781632	66804632	49665780	113822728	108172888	42219076	34009544	140758544	83151264	364923488	19246366	76447152	95733624	367504768	47748988	163000288	77948224	434047520	44028164	29067184	79042976	1245278592	162629	306389440	312712416
P68431	Histone H3.1 (Histone H3/a) (Histone H3/b) (Histone H3/c) (Histone H3/d) (Histone H3/f) (Histone H3/h) (Histone H3/i) (Histone H3/j) (Histone H3/k) (Histone H3/l)	H31	EIAQDFK[+28]TDLR	281320	108011024	506348	86133832	139073984	0	393368	57410716	135951648	130801	331012992	405829	742562	0	0	887833280	454928	838849664	177373	826561856	455147	484224416	1133108	36828140	36496204	12892964	1990023	30762176	59320480	19568178	1678476	17328584	0	19902396	13295852	33507274	53435440	17794468	8409202	35078708	726714	19747400	83874464	146398	30102296	93162976
P68431	Histone H3.1 (Histone H3/a) (Histone H3/b) (Histone H3/c) (Histone H3/d) (Histone H3/f) (Histone H3/h) (Histone H3/i) (Histone H3/j) (Histone H3/k) (Histone H3/l)	H31	EIAQDFK[+14]TDLR	101536232	38325848	0	1999690	4947312	3405496	11656322048	5250078	0	29515958	3480986	0	16248921088	2220201	0	15087982592	1072213	13171148800	359694	15506390016	0	61762	3343098624	349783840	1081084288	592533312	2485270528	246957840	1158401792	458893792	2831600640	137708576	818668928	494711840	3079651328	342563264	1080855936	461847104	3117533184	333611008	358846208	528769408	6832487424	61897508	2022540416	1776140032
P68431	Histone H3.1 (Histone H3/a) (Histone H3/b) (Histone H3/c) (Histone H3/d) (Histone H3/f) (Histone H3/h) (Histone H3/i) (Histone H3/j) (Histone H3/k) (Histone H3/l)	H31	EIAQDFK[+14]TDLR	26167658	7673304	0	1336001	0	904793	1371577728	83257	0	9986118	457519	0	2892307456	0	0	3726294272	0	3195313408	0	4313569280	0	0	29001322	243235696	268822752	118714520	14056977	210625680	420288352	135883024	57878948	122408376	4708996	130323376	69761256	256013840	331425152	147624768	44876252	245853600	44905164	135553552	451835264	26585902	234126736	552269824
P68431	Histone H3.1 (Histone H3/a) (Histone H3/b) (Histone H3/c) (Histone H3/d) (Histone H3/f) (Histone H3/h) (Histone H3/i) (Histone H3/j) (Histone H3/k) (Histone H3/l)	H31	R[+14]VTIMPKDIQLAR	10281114	1391016	8744319	1174071	52524960	479896	76687456	8651306	0	9451400	15839573	0	0	13735113	0	42075256	6608258	19411956	67557232	14919729	0	15991340	284988768	172901	107260832	157956	294763680	439624	7951205	804867	148858640	795467	459345536	275508	144115568	304981	39456040	2128488	109747752	311767	238875632	555578	123605584	46129376	6628392	340784832
P68431	Histone H3.1 (Histone H3/a) (Histone H3/b) (Histone H3/c) (Histone H3/d) (Histone H3/f) (Histone H3/h) (Histone H3/i) (Histone H3/j) (Histone H3/k) (Histone H3/l)	H31	R[+14]VTIMPKDIQLAR	1028035	0	980886	41389	0	33846	16165788	1097252	0	3587829	2722050	0	0	3348955	0	0	1735417	6838058	492495	5772789	47160	6945729	0	22134	650990	64703	514960	66239	169237	210221	0	182729	1328670	192178	0	67003	6366124	1371569	0	39979	2271510	120998	0	11404536	267587	84998624
P62805	Histone H4	H4	K[+28]VLRDNIQGITKPAIR	0	0	0	0	0	0	0	0	516557	3019091	8564710	648294	1920034	0	2322592	1191774	3512326	805034	226829	9258356	23000562	603031	26390	0	0	419542	75918	0	0	0	0	0	448835	0	18421	0	0	0	0	0	102327	0	914525	95429048	2311711	22516932
P62805	Histone H4	H4	K[+28]VLRDNIQGITKPAIR	0	2935777	0	0	0	353165	0	0	324349	17380198	14161591	6257479	5869291	4121089	7230276	4320927	6982591	8277839	0	63334188	0	10165561	80214	4353597	282828	1697283	87060	4600407	439729	695200	93559	4370274	572613	1472688	3913	1167269	0	536999	239968	2738620	141135	1056536	927014	306651552	15557767	81606392
P62805	Histone H4	H4	KVLR[+28]DNIQGITKPAIR	0	48873	0	0	0	0	0	0	0	0	4728227	24128196	0	0	0	1327278	0	0	0	9261974	23037160	552026	214897	0	0	420562	75981	0	0	0	0	0	655770	0	0	0	0	0	0	0	102853	0	914229	95425256	134526	22430564
P62805	Histone H4	H4	KVLR[+28]DNIQGITKPAIR	0	123764	0	0	0	0	403094	0	0	0	14119357	26269184	0	7658424	0	4405226	0	0	0	58708152	0	8398153	190389	5592849	735185	1849030	87140	6103819	0	228667	0	4233608	197585	1109535	183656	2529054	0	742509	0	2739608	141861	1143935	926686	259834544	1167309	83350936
P62805	Histone H4	H4	KVLR[+28]DNIQGITKPAIR	70303208	7059665	10285236	6666653	42335268	8072847	55345852	6231759	83455488	4968347	10477531	38457256	58663296	22503132	2389508	11568782	184754	0	10083337	119601888	50153032	22856810	55921	10050256	345741	2823890	80564	6557020	10985746	742484	20920246	8056617	0	2082431	2383144	6500984	13561370	2425630	35804112	4519328	145973	1990191	33964	435104032	2212668	99946440
P62805	Histone H4	H4	ISGLIYEETR[+14]GVLK	222278	0	2065778	525896	0	0	371887	173056	1770373	3180551	2208322	5311471	10844476	721223	1323071	2917105	6676841	415699	2131235	36895	295697	218056	1147600	1272488	9000984	72946	0	559785	10322368	0	998748	205680	4400597	0	1079670	378350	6005654	1965068	1944386	17070	1043556	0	2262677	125461	5800127	26748556
P62805	Histone H4	H4	ISGLIYEETRGVLK[+14]	1124265	14024	2122604	551212	952170	193381	0	452045	1788650	932192	3905362	5311744	11063199	0	1326673	2910125	6122548	5120659	0	1788990	2214926	191546	1184135	1215265	9162450	72930	0	559777	10321438	0	998824	205867	4405754	0	1072793	377708	6004844	1964441	1948026	17669	1043235	0	2261928	63067	8577397	26760040
P62805	Histone H4	H4	DAVTYTEHAK[+42]R[+14]K	0	3309	4436552	1755	0	0	0	0	0	0	58556	2985609	0	0	11277463	1907671	0	128638	0	0	3690621	0	1211951	0	1147831	0	122931	0	0	0	40413	92365	0	0	0	0	184691	0	0	0	0	0	4224507	16089417	4593067	244805
P62805	Histone H4	H4	DAVTYTEHAKR[+28]K[+28]	2060609	0	4452753	0	0	0	0	0	1687411	0	0	0	0	0	11179409	0	16147698	332280	4196660	0	3673079	0	1211642	0	880036	0	124147	0	0	0	40479	0	0	0	0	0	152458	0	0	0	0	0	4228126	16088852	4574089	245426
P62805	Histone H4	H4	K[+14]TVTAMDVVYALK	109680	0	1096344	31086	0	0	315881	0	497695	0	28232634	0	4579723	110467	10631473	479342	0	350766	1792796	108118	12593058	0	1550818	105207	237285	0	0	785468	0	0	0	22366	2504662	0	0	344286	2269593	0	226632	435892	229427	70963	38029700	2418029	15442995	2977926
P62805	Histone H4	H4	KTVTAMDVVYALK[+28]	0	58807	2432053	0	0	0	546722	68584	535363	136354	87726248	0	1244924	203798	96630224	1029873	107245976	60468	25605978	53251608	49658600	171453	0	2527945	3120469	158881	0	2094565	0	0	515772	1548779	1346948	0	0	1221136	4303498	0	2428678	1247003	4123112	174373	77582512	47754932	26744968	18190026
P62805	Histone H4	H4	KTVTAMDVVYALK[+28]	0	0	478626	0	0	0	25368	0	452599	0	37985080	0	0	0	33158606	0	36052192	0	6925909	22283278	21264820	0	0	1848202	752105	65289	0	1444646	376666	0	0	1106511	0	499915	0	884142	1370110	62232	0	975030	794758	0	23712754	19333124	8302458	9265167
P62805	Histone H4	H4	TVTAMDVVYALK[+28]	0	3466744	0	0	0	21446386	0	0	0	11246570	36018044	0	0	57508436	17610534	52074832	42547964	46231140	0	55077604	0	14041433	840116	567873	1130339	7743666	2599973	2775529	1700635	6425901	3446035	843260	2168609	9087896	2554100	3324793	1354078	7930256	1541642	2399036	647729	5353497	9622158	3141361	3419818	5307815
P62805	Histone H4	H4	KTVTAMDVVYALK[+28]R[+28]	130954	186667	0	0	0	0	620884	0	7446544	0	18005068	231604	73990	1712909	1512497	0	7150752	0	4264165	0	0	0	24878530	1853299	747490	0	23734318	1477321	2025827	117428	21939896	1304363	2049231	0	10060731	1056790	2635872	0	12565847	269894	1816186	411711	17670920	45910092	25481036	3690598
P62805	Histone H4	H4	KTVTAMDVVYALK[+28]R[+28]	0	147819	0	0	0	0	0	0	0	0	45471128	0	0	5279906	1104339	0	460687	0	362587	0	0	0	0	3205605	412992	383916	0	4253360	10096404	215284	0	2630080	6497957	621633	0	3029630	6744656	0	0	757275	5281611	0	46619256	73306784	55249368	13456117
P62805	Histone H4	H4	KTVTAMDVVYALK[+42]R[+14]	7198507	0	0	0	1210396	257431	0	0	7424900	0	18001876	26936898	3108902	0	0	9056518	9333128	0	3986897	0	6182015	53028	29494970	1853332	747629	0	21288952	1477261	2025816	177809	21625082	1304223	2049324	0	8832123	1056768	2635016	0	12555354	269757	1815892	0	17676826	45883588	25890982	3686472
P62805	Histone H4	H4	KTVTAMDVVYALK[+42]R[+14]	0	0	0	0	0	0	0	0	0	0	46268728	69654200	4602923	0	0	3860068	7859280	0	362567	0	0	0	0	3205715	413106	383952	0	4253209	10100536	255030	0	2629705	6497998	622125	0	3029563	6746821	0	0	757292	5278839	168313	47856544	73293560	55605104	13434837
P62805	Histone H4	H4	TVTAMDVVYALK[+28]R[+28]	271225	800961	3020686	0	0	0	604723	174165	459977	13923402	30227108	44022492	0	4545726	0	0	5316353	5119993	0	6092164	0	616306	2296673	1060024	2870395	455486	1549830	2370764	2027015	133989	3907016	0	7784633	211847	3560012	560436	3806276	0	3466013	0	3036758	0	35462456	2498811	19148042	16683738
Q14980	Nuclear mitotic apparatus protein 1 (Nuclear matrix protein-22) (NMP-22) (Nuclear mitotic apparatus protein) (NuMA protein) (SP-H antigen)	NUMA1	TQPDGTSVPGEPASPISQR[+14]	720198	394279	0	0	3782055	2025808	2123522	289818	1245082	1052312	884764	1445017	0	1238595	0	1274437	2340712	2043720	773342	865099	0	486577	1285383	0	0	260825	397960	0	0	177015	620122	0	0	71941	926087	0	502187	105290	265074	0	650892	328025	755471	70900984	2292291	0
P16403	Histone H1.2 (Histone H1c) (Histone H1d) (Histone H1s-1)	H12	K[+14]ASGPPVSELITK	0	4222363648	0	3493212672	0	583044	0	1020551	13276550144	1942835	0	0	1733035	41215754240	15046349824	36615323648	14358501376	7520362	7302944768	4131379	6223761920	2624125	2639688192	587201536	3019675136	721506752	2157644032	415059744	1670612096	697070144	2745829632	343681888	523657632	704039232	3390003712	467504000	2372353536	727248064	2753300736	454617056	1129606272	360107232	4739689984	13436000256	3978729728	10869523456
P16403	Histone H1.2 (Histone H1c) (Histone H1d) (Histone H1s-1)	H12	K[+14]ASGPPVSELITK	0	1148157312	0	852259520	0	91695	0	0	565350976	96053	0	0	0	10060332032	2167005952	7843282432	1856426752	318195	1074190080	1008534	709368512	431937	274207392	346215360	601792512	286768576	194500736	301845888	601544512	323258336	105709408	261930176	14415295	245050544	141569216	331924960	728187520	314994624	323618016	315817536	41517404	223949520	1053234880	8111057408	1013554176	4564786176
P16403	Histone H1.2 (Histone H1c) (Histone H1d) (Histone H1s-1)	H12	SGVSLAALK[+14]K	0	1296509	264595	1369972	0	259176	652573	0	1445536	177920	230782	524102	316355	0	487342	471634	321878	980083	8134722	0	11768118	0	1188746	1542072	5297264	3810885	337290	3798679	2553377	37853	0	2761999	5649602	2065099	232110	949112	3556072	2341839	0	5046307	5818536	0	266808	458517472	35309504	74461792
P16403	Histone H1.2 (Histone H1c) (Histone H1d) (Histone H1s-1)	H12	SGVSLAALKK[+14]	0	1296509	189214	1373349	0	853536	0	0	0	1174379	0	512521	0	4979603	495304	473342	336520	0	7967486	0	2613452	0	1188720	1536781	5291547	0	337418	3798773	2568817	2345271	0	2763352	5640744	2064575	153551	966262	3564453	2414664	0	5046394	5817011	0	267062	458704000	35213264	74301552
P16403	Histone H1.2 (Histone H1c) (Histone H1d) (Histone H1s-1)	H12	K[+28]ALAAAGYDVEK	1032088	0	38899	1914683	0	0	888815	2725784	3604714	0	42731	720392	0	0	302011	3436247	0	369844	0	4431879	12633208	4972470	5482722	3482388	0	4889575	4759770	4399105	1347513	3918765	5250984	1523687	0	7788763	3998973	8692715	443036	2281750	303395	5247831	1604153	5717960	211231	11114346	3718462	1874999
P16403	Histone H1.2 (Histone H1c) (Histone H1d) (Histone H1s-1)	H12	K[+14]ALAAAGYDVEK	0	14613	0	1681670	0	0	0	0	0	7548	194671808	200317440	0	0	87579288	0	79338008	109022112	40718284	137038896	0	0	46133096	7503907	5031105	4337488	30360950	7535831	10204935	3387169	53279572	5132489	5314056	4463263	36728716	9606653	397412	4380790	23442034	9217290	1035607	2497494	61309944	1115716	7396339	13777622
P16403	Histone H1.2 (Histone H1c) (Histone H1d) (Histone H1s-1)	H12	K[+14]ALAAAGYDVEK	0	0	0	1249724	0	39344	0	30946	0	0	21572516	28427996	0	0	6053620	443334	6255252	13064931	3250128	26169696	0	0	2156492	2478740	0	835760	1239057	2192004	737915	907274	1447976	1801276	0	620064	0	3670860	0	890625	0	2763780	283705	580208	4877442	170150	0	3826771
P26373	Large ribosomal subunit protein eL13 (60S ribosomal protein L13) (Breast basic conserved protein 1)	RL13	LATQLTGPVMPVR[+14]	0	5029057	0	64724	0	0	0	0	0	52322	2596185	1362759	4328551	106092	6775933	17426	25403282	47741	2745596	247655	10678690	43277	757269	1030470	309826	67622	322966	968321	414923	221235	2342313	991769	1681896	94297	0	699920	752294	150357	488761	296416	363129	0	256015	55191816	816247	14413604
Q86W28	NACHT, LRR and PYD domains-containing protein 8 (Nucleotide-binding oligomerization domain protein 16) (PYRIN and NACHT-containing protein 4)	NALP8	ALAAALR[+28]HPQCK	7193339	10489	8857060	837520	7104703	2172751	9468876	71805	9356187	103387	38915544	39276592	82951544	27036038	72030632	20520710	114462200	19285768	39048304	36437836	35275936	10724117	5865108	706659	1321626	1088459	7904712	253018	9167762	0	2468459	234547	11028006	173194	8761437	51671	602286	0	9081774	628414	10723812	0	64142532	431163	4820326	196123
Q86W28	NACHT, LRR and PYD domains-containing protein 8 (Nucleotide-binding oligomerization domain protein 16) (PYRIN and NACHT-containing protein 4)	NALP8	ALAAALRHPQCK[+28]	7207576	1474774	8926908	1226346	7139868	2160506	9442508	76862	9360363	9209052	39441112	39040916	82319336	27026314	72099376	20501524	89401648	19246794	38942648	36350908	0	10723270	5864542	706634	1322392	1102057	7904608	253027	9168042	0	2473116	276349	11026047	174316	8761179	338648	604396	0	3129455	628395	10721946	0	64090488	431202	4821371	195496
O60934	Nibrin (Cell cycle regulatory protein p95) (Nijmegen breakage syndrome protein 1)	NBN	TSSNNNSMVSNTLAK[+42]MR	0	0	0	413048	0	373262	144566	354856	0	0	13440584	24407792	25944268	8134534	0	23996768	8182773	0	0	7829120	0	1523032	0	1682064	0	0		1459495	270748	0	0	993686	0	51672	0	716693	0	620870	0	0	0		6274409	0	577494	0
O60934	Nibrin (Cell cycle regulatory protein p95) (Nijmegen breakage syndrome protein 1)	NBN	TSSNNNSMVSNTLAK[+14]MR[+28]	0	0	0	347147	0	125674	278592	0	0	645877	13443118	23125406	24839684	7797587	0	23995960	8222693	0	1249042	7768700	0	1533573	0	965681	0	0		1467296	271607	0	0	997411	0	51649	0	713048	0	614262	0	0	0		6398712	0	571942	0
Q75T13	GPI inositol-deacylase (EC 3.1.-.-) (Post-GPI attachment to proteins factor 1) (hPGAP1)	PGAP1	LHIAQPENNTHVALFK[+28]	278236	0	0	0	0	0	2297646	0	572653	0	330773	359670	7124337	264318	0	3202593	250937	0	0	994885	1138738	0	1282322	22591	0	0	0	0	0	0	0	0	0	0	0	0	0	0	0	28046	0	0	0	0	528623	162915
Q9Y462	Zinc finger protein 711 (Zinc finger protein 6)	ZN711	YR[+14]EASPLSSNK[+28]	2573923	0	3585280	2284897	3583917	1251650	2210880	701831	5772288	153244	4440077	4049317	3910252	7029509	8565633	5043435	7965765	0	4207136	10663035	0	208146	147688	1276615	1130762	0	0	596489	1829259	604567	0	1084238	202478	1318386	0	1264390	177177	838568	4629127	819889	2314278	1121455	6966671	4766061	2042638	283129
Q96BV0	Zinc finger protein 775	ZN775	QHLLKHQRVHR[+28]	61145716	0	251916464	11970695	117309088	0	687879488	147595024	181928720	8309394	131634776	169005744	43271424	55914356	23397734	57721436	19293966	44245848	257156	48005556	21459910	22347712	54923764	4789346	13775475	9785290	17204408	3185908	8654407	21287704	0	646748	71012408	15581566	15276584	1675612	203339488	80687088	164087680	3219196	57477352	28064032	59388428	203690208	296536576	2129222144
Q96BV0	Zinc finger protein 775	ZN775	QHLLKHQR[+14]VHR[+14]	14842509	18959688	255427264	40612840	33396694	357620	684647936	147356720	185471584	8353013	130918312	169001104	15774357	55900096	23751036	57735184	230021184	44247012	865566	48046384	21450502	22333256	54838468	4785130	13775021	9631180	16931014	707581	8995182	21623206	16559113	646815	71033240	15580814	15211170	152261	204549744	80653736	164089328	3218906	57814732	28062566	59397496	201662848	287290656	2129192704
[truncated: 44 more columns]

## Sheet: Caption
			List of identified and quantified peptides.
			The table includes peptides identified with a search in Proteome Discoverer (Thermo Scientific) and then imported into Skyline to perform extracted ion chromatography. Columns A-D include the description of the identified peptide, including protein UniProt accession number, description, gene symbol and modified sequence. Values in parenthesis describe presence of monomethylation [+14], dimethylat…

## Sheet: Sample description
	Description
NP1_C1_ELU	FeNPs, repetition 1, cycle 1, eluate
NP2_C1_ELU	FeNPs, repetition 2, cycle 1, eluate
NP3_C1_ELU	FeNPs, repetition 3, cycle 1, eluate
NP4_C1_ELU	FeNPs, repetition 4, cycle 1, eluate
NP5_C1_ELU	FeNPs, repetition 5, cycle 1, eluate
NP1_C2_ELU	FeNPs, repetition 1, cycle 2, eluate
NP2_C2_ELU	FeNPs, repetition 2, cycle 2, eluate
NP3_C2_ELU	FeNPs, repetition 3, cycle 2, eluate
NP4_C2_ELU	FeNPs, repetition 4, cycle 2, eluate
NP5_C2_ELU	FeNPs, repetition 5, cycle 2, eluate
NP1_C3_ELU	FeNPs, repetition 1, cycle 3, eluate
NP2_C3_ELU	FeNPs, repetition 2, cycle 3, eluate
NP3_C3_ELU	FeNPs, repetition 3, cycle 3, eluate
NP4_C3_ELU	FeNPs, repetition 4, cycle 3, eluate
NP5_C3_ELU	FeNPs, repetition 5, cycle 3, eluate
NP1_C1_SUP	FeNPs, repetition 1, cycle 1, supernatant
NP2_C1_SUP	FeNPs, repetition 2, cycle 1, supernatant
NP3_C1_SUP	FeNPs, repetition 3, cycle 1, supernatant
NP4_C1_SUP	FeNPs, repetition 4, cycle 1, supernatant
NP5_C1_SUP	FeNPs, repetition 5, cycle 1, supernatant
NP1_C2_SUP	FeNPs, repetition 1, cycle 2, supernatant
NP2_C2_SUP	FeNPs, repetition 2, cycle 2, supernatant
NP3_C2_SUP	FeNPs, repetition 3, cycle 2, supernatant
NP4_C2_SUP	FeNPs, repetition 4, cycle 2, supernatant
NP5_C2_SUP	FeNPs, repetition 5, cycle 2, supernatant
NP1_C3_SUP	FeNPs, repetition 1, cycle 3, supernatant
NP2_C3_SUP	FeNPs, repetition 2, cycle 3, supernatant
NP3_C3_SUP	FeNPs, repetition 3, cycle 3, supernatant
NP4_C3_SUP	FeNPs, repetition 4, cycle 3, supernatant
NP5_C3_SUP	FeNPs, repetition 5, cycle 3, supernatant
Me_NP1_C1_ELU	FeNPs@2, repetition 1, cycle 1, eluate
Me_NP2_C1_ELU	FeNPs@2, repetition 1, cycle 1, eluate
Me_NP3_C1_ELU	FeNPs@2, repetition 1, cycle 1, eluate
Me_NP4_C1_ELU	FeNPs@2, repetition 1, cycle 1, eluate
Me_NP5_C1_ELU	FeNPs@2, repetition 1, cycle 1, eluate
Me_NP1_C2_ELU	FeNPs@2, repetition 1, cycle 2, eluate
Me_NP2_C2_ELU	FeNPs@2, repetition 2, cycle 2, eluate
Me_NP3_C2_ELU	FeNPs@2, repetition 3, cycle 2, eluate
Me_NP4_C2_ELU	FeNPs@2, repetition 4, cycle 2, eluate
Me_NP5_C2_ELU	FeNPs@2, repetition 5, cycle 2, eluate
Me_NP1_C3_ELU	FeNPs@2, repetition 1, cycle 3, eluate
Me_NP2_C3_ELU	FeNPs@2, repetition 2, cycle 3, eluate
Me_NP3_C3_ELU	FeNPs@2, repetition 3, cycle 3, eluate
Me_NP4_C3_ELU	FeNPs@2, repetition 4, cycle 3, eluate
Me_NP5_C3_ELU	FeNPs@2, repetition 5, cycle 3, eluate
Me_NP1_C1_SUP	FeNPs@2, repetition 1, cycle 1, supernatant
Me_NP2_C1_SUP	FeNPs@2, repetition 2, cycle 1, supernatant
Me_NP3_C1_SUP	FeNPs@2, repetition 3, cycle 1, supernatant
Me_NP4_C1_SUP	FeNPs@2, repetition 4, cycle 1, supernatant
Me_NP5_C1_SUP	FeNPs@2, repetition 5, cycle 1, supernatant
Me_NP1_C2_SUP	FeNPs@2, repetition 1, cycle 2, supernatant
Me_NP2_C2_SUP	FeNPs@2, repetition 2, cycle 2, supernatant
Me_NP3_C2_SUP	FeNPs@2, repetition 3, cycle 2, supernatant
Me_NP4_C2_SUP	FeNPs@2, repetition 4, cycle 2, supernatant
Me_NP5_C2_SUP	FeNPs@2, repetition 5, cycle 2, supernatant
Me_NP1_C3_SUP	FeNPs@2, repetition 1, cycle 3, supernatant
Me_NP2_C3_SUP	FeNPs@2, repetition 2, cycle 3, supernatant
Me_NP3_C3_SUP	FeNPs@2, repetition 3, cycle 3, supernatant
Me_NP4_C3_SUP	FeNPs@2, repetition 4, cycle 3, supernatant
Me_NP5_C3_SUP	FeNPs@2, repetition 5, cycle 3, supernatant
PO_NP1_C1_ELU	FeNPs@1, repetition 1, cycle 1, eluate
PO_NP2_C1_ELU	FeNPs@1, repetition 2, cycle 1, eluate
PO_NP3_C1_ELU	FeNPs@1, repetition 3, cycle 1, eluate
PO_NP4_C1_ELU	FeNPs@1, repetition 4, cycle 1, eluate
PO_NP5_C1_ELU	FeNPs@1, repetition 5, cycle 1, eluate
PO_NP1_C2_ELU	FeNPs@1, repetition 1, cycle 2, eluate
PO_NP2_C2_ELU	FeNPs@1, repetition 2, cycle 2, eluate
PO_NP3_C2_ELU	FeNPs@1, repetition 3, cycle 2, eluate
PO_NP4_C2_ELU	FeNPs@1, repetition 4, cycle 2, eluate
PO_NP5_C2_ELU	FeNPs@1, repetition 5, cycle 2, eluate
PO_NP1_C3_ELU	FeNPs@1, repetition 1, cycle 3, eluate
PO_NP2_C3_ELU	FeNPs@1, repetition 2, cycle 3, eluate
PO_NP3_C3_ELU	FeNPs@1, repetition 3, cycle 3, eluate
PO_NP4_C3_ELU	FeNPs@1, repetition 4, cycle 3, eluate
PO_NP5_C3_ELU	FeNPs@1, repetition 5, cycle 3, eluate
PO_NP1_C1_SUP	FeNPs@1, repetition 1, cycle 1, supernatant
PO_NP2_C1_SUP	FeNPs@1, repetition 2, cycle 1, supernatant
PO_NP3_C1_SUP	FeNPs@1, repetition 3, cycle 1, supernatant
PO_NP4_C1_SUP	FeNPs@1, repetition 4, cycle 1, supernatant
PO_NP5_C1_SUP	FeNPs@1, repetition 5, cycle 1, supernatant
PO_NP1_C2_SUP	FeNPs@1, repetition 1, cycle 2, supernatant
PO_NP2_C2_SUP	FeNPs@1, repetition 2, cycle 2, supernatant
PO_NP3_C2_SUP	FeNPs@1, repetition 3, cycle 2, supernatant
PO_NP4_C2_SUP	FeNPs@1, repetition 4, cycle 2, supernatant
PO_NP5_C2_SUP	FeNPs@1, repetition 5, cycle 2, supernatant
PO_NP1_C3_SUP	FeNPs@1, repetition 1, cycle 3, supernatant
PO_NP2_C3_SUP	FeNPs@1, repetition 2, cycle 3, supernatant
PO_NP3_C3_SUP	FeNPs@1, repetition 3, cycle 3, supernatant
PO_NP4_C3_SUP	FeNPs@1, repetition 4, cycle 3, supernatant
PO_NP5_C3_SUP	FeNPs@1, repetition 5, cycle 3, supernatant
